# Supplementary material for: Improving the Modeling of Extracellular Ligand Binding Pockets in RosettaGPCR for Conformational Selection
Source: Int J Mol Sci. 2023 Apr 24;24(9):7788. doi: 10.3390/ijms24097788 (PMC10178219; doi:10.3390/ijms24097788)
Supplement: Supplementary file 1 [file ijms-24-07788-s001.zip]

Archive with 5 entries (5 files):
- Protocol_Capture_RosettaGPCRPocketSize.pdf
- S1_all_inactive_distance.ods
- S2_all_calculated_volumes.ods
- S4_List_of_benchmarked_parameters.ods
- Supplementary_RosettaPocketSize.pdf
