# Supplementary material for: Improving the Modeling of Extracellular Ligand Binding Pockets in RosettaGPCR for Conformational Selection
Source: Int J Mol Sci. 2023 Apr 24;24(9):7788. doi: 10.3390/ijms24097788 (PMC10178219; doi:10.3390/ijms24097788)
Supplement: Supplementary file 1 [file ijms-24-07788-s001.zip › S1_all_inactive_distance.ods]

## Sheet: inactive
	PDB	./2RH1	./3ODU	./3PBL	./3RZE	./3V2Y	./4BUO	./4BVN	./4DJH	./4DKL	./4IAR	./4N6H	./4U15	./4Z35	./4ZUD	./5DHG	./5DSG	./5LWE	./5NM4	./5U09	./5UEN	./5UIW	./5VBL	./5WIU	./5WQC	./5X33	./5YWY	./5ZBQ	./5ZKC	./5ZTY	./6A94	./6BQH	./6C1R	./6CM4	./6D27	./6GPX	./6HLP	./1U19	./6IGK	./6KUW	./6KUX	./6LFL	./6ME2	./6ME6	./6OL9	./6QZH	./6TOS	./6WJC
	Receptor	ADRB2	CXCR4	D3R	H1R	S1P1	NTS1	ADRB1	KOR	MOR	5HT1B	DOR	M3R	LPAR1	AGTR1	NOP	M4R	CCR9	AA2AR	CB1	AA1R	CCR5	APJ	D4R	OX2R	BLT1	PE2R4	NPY1R	M2R	CNR2	5HT2A	5HT2C	C5AR1	D2R	PD2R2	CCR2	NK1R	OPSD	EDNRB	ADA2C	ADA2A	CXCR2	MT1R	MT2R	M5R	CCR7	OX1R	M1R
Res1	Res2
2.60x59	3.40x40	22.380233644893	23.259359879412	22.040842928527	21.9748332644414	21.6567290928247	23.2497164928951	22.5368958599005	22.8596700763594	24.1619744847146	21.1168546426782	24.093454484569	21.5087621680096	21.0981015259667	23.843251896501	24.2929722759485	21.4786326846008	25.0933006597378	20.5593137531387	23.6483016092065	22.0770630519551	22.4991962967569	23.452903807418	22.591313042849	22.3105209934685	23.6910707651638	22.9313390145451	23.0946427121097	21.7354368026042	21.9928210787066	21.8742838511344	21.3596641827534	24.865935675136	20.9245443916946	24.0484354168831	22.6525186899824	22.3538538288144	23.268320394906	21.8606672359285	22.1287934375103	22.0774501471524	24.019949313019	23.5889800966468	24.1904653324404	21.377446503266	24.8902108870134	22.1019762464808	21.899024544486
2.60x59	5.38x39	23.7572661095506	23.1244895943673	21.4698713084173	25.4094193754993	23.1112221442311	22.901415261944	23.746421604107	23.5201126697982	23.9305718694727	25.6289343321177	24.818647303993	24.9657414270035	22.870122736881	27.9145324875771	25.8644804509969	25.4902555106849	31.1854353825628	19.818021747894	25.020317304143	21.7944209604201	22.9687396476167	24.2695331846329	22.533288730232	24.1695176824032	24.6117442291277	25.3601113167904	24.2514662855671	24.7756354913451	24.512062622309	21.6240472391271	22.0129463952466	25.2556358462819	18.6329143453191	24.5596506693397	23.1191980397245	25.6822513226547	24.6488356317291	20.8326867686336	23.0002496290801	23.9009428684309	26.3579319750241	25.242940656746	26.1318984384985	25.4044711615888	27.1422538857774	23.6820017312726	24.2141655441603
2.60x59	7.32x31	18.025069126081	20.5012484497896	17.9697474940523	17.6677480738208	22.8985646056691	16.4891511606874	17.5947188099157	17.5710853677284	20.0805707339209	18.2640259252992	19.9019558084124	17.034069948195	23.1644554004621	19.6298237893263	19.2429541650964	17.6073247826011	22.6239209245436	17.7100685769423	23.7366949257895	20.3964293198589	20.8805916343383	21.5234084196718	18.542873806398	16.6586955971949	19.6161206409422	21.7571524101846	14.930034192861	17.1171534432569	19.7766597280734	17.7901278522668	18.0398515514956	20.1770790998103	18.2009110486261	21.4069325219659	21.5845771095938	16.4879470219915	19.06791826603	15.3157732419881	17.5235247881241	18.0231197632374	22.0515725969827	21.5450067068915	21.6180807890062	17.4107708617396	19.837960026172	15.2732823911561	18.7791836617037
3.40x40	5.38x39	18.6708854369577	17.7516978624581	17.9266468420617	19.178446391718	17.120289775585	17.5675005051942	18.9215856629406	17.160348947501	17.3526875440089	18.672201610951	16.7583210674578	19.650160126574	17.7816105569771	19.0410235281615	17.9246706803779	19.2967423675604	22.3405744330803	17.5859678152782	17.8491941834919	17.3927315853491	16.6880616909214	17.5148938335349	17.8383103459941	18.2108404528731	17.8083747152849	17.8040793359275	17.9724917860602	19.2526804627304	18.5470822772748	17.9617738823313	18.0805219780846	17.9657835064324	17.6800500282098	16.078543870637	16.6831237182969	18.3737770749511	17.9431131635511	17.0065313923798	18.0181176597335	18.778692686127	18.829840174574	17.7814501939521	17.8691058813809	19.1444940387569	18.7193692735626	17.9658717016459	19.3833602092104
3.40x40	7.32x31	24.7944578686448	24.3126947498627	25.3449737423419	24.9323153156701	24.1003116577359	26.0565442643494	25.0616661257786	25.2814158820269	26.1524911624113	24.0510466508217	25.62782936575	25.0320434843023	24.8150106588734	25.6273620374786	26.3467475222275	25.1802104836318	25.3711223638214	26.9642438239977	25.2051738537944	26.9062230348297	24.6611604147088	25.1781912575149	25.3417626458777	25.8884281484991	23.8433745304644	26.1647473903342	26.568475473764	25.5324852100221	25.3212410635814	24.4638957854222	23.5250400637278	25.8553426200466	25.7212058232113	26.0125137193621	24.7733225466428	27.7497359987442	26.954398175437	25.1356208994327	24.7958079924813	25.3819624733786	25.5848786004546	26.0365760037682	26.3647826844827	24.5889917036059	25.2267755767557	26.0158720976253	26.0118536632821
5.38x39	7.32x31	19.0659898772658	17.8912632030273	21.0627513160081	21.4376563317915	16.9743103541793	21.5611089000543	19.3718911054135	21.1992792566163	22.5280379305434	22.1655763741889	22.0010658605441	19.1088748491375	18.3836958199378	22.1915095926347	22.2823737963441	19.2588345961016	25.0620702656425	21.0345472259329	20.0233037234119	22.6811769094992	17.7743333489614	19.8087246686908	20.303514621858	22.3078191224512	16.371463312728	27.8563406606108	23.4899913580231	19.3877648531232	19.5328545276926	17.4376714615226	18.3897701181934	16.6395825969283	19.0608475677237	18.5889396416256	16.5205710857706	24.8936082559359	23.5283841561634	18.2491451854601	19.8943365307818	20.9651253275529	24.176079252021	22.5184723504948	22.5374515196373	18.6209948445297	22.9108956612351	22.7506259474327	19.8260292040539
2.65x64	4.57x57	23.0917629686432	22.6311077501743	22.9385348703879	24.8213106221247	15.7368018987341	20.5155766674983	23.4109561316918	23.2798691147523	23.9338428590145	21.1369372663118	23.5977930112119	23.8510162047658	20.1241034085994	21.9853415029196	23.1813250699782	23.7234758625291	NA	19.1705030972064	22.3119733999483	21.7324437880327	22.6522723584191	22.2174819680359	23.0755440022549	22.4763026541289	23.4072445623145	26.0122521900738	22.060665198493	23.5042167706137	25.4234753328494	24.0501442199418	22.9620271970922	22.9986053707611	24.0353793812372	24.4860665889807	22.5966204552805	20.3678064847445	22.4231399005581	23.9637788338985	23.1875713907257	23.2535673822319	23.3624446922834	25.1630870323973	26.2332820287512	22.7022663626344	24.7681830177347	22.8306828851	22.9241646303633
2.65x64	5.46x461	25.4397848654426	24.2287484200072	24.6710786144425	27.125413121278	25.3877232141837	22.5337134090234	24.9898295712476	25.7543873738049	26.529337289122	22.7529184721433	25.9212553901234	25.759661682561	27.9000230465855	26.6144205460123	25.644566695501	25.3176877893697	NA	24.7844761292225	31.1908986404688	28.2897710489145	24.7209467456244	23.9617577610659	24.8142668035951	22.5679207947919	25.4894190989124	32.4480326059994	24.9876810048472	25.1880505200383	32.9476485352142	25.2001974000205	25.3914470048479	25.7080984516553	24.9288824659269	27.6590802811663	25.1820331585835	23.7552984195105	28.3586506202252	25.0329677225853	23.8127365500062	24.4930067978597	27.9853666225762	28.6648348329447	29.3129479581976	25.1617436001562	29.5188897148927	23.3438683383881	24.1496291689955
2.65x64	6.48x48	19.5937739601129	20.4372062914675	19.6333423288038	20.8785872366882	25.876929879721	18.2788692483972	19.2451713944044	20.5854660136709	21.4598749530374	17.7576576721143	20.91341189285	19.462616756233	23.3168921170897	20.8024361554122	19.8308713373871	19.2042100592552	NA	18.3681949031471	23.970832734805	21.4664960112264	20.3677648503708	19.4646841998528	19.0575805389876	17.5966833806829	20.9874086299381	23.5674587938539	18.4400126355705	19.3468926962445	26.1854797359147	19.5305864223274	19.7124007923946	20.6009421871913	19.8705456392118	21.8645250119915	20.1095315211469	19.9590937920538	21.3138239412828	19.8670921375022	19.5620169461127	19.6448195970337	20.8103421644143	21.913888655371	22.7915556730996	19.3199458073774	21.7217378908779	17.3631023437633	19.106052575035
4.57x57	5.46x461	8.13971995832781	12.8195786982256	9.43900026485856	10.4539832599828	12.1788653001829	9.82514193281705	7.75191053869948	12.4906964977939	12.0589396300006	10.1206759655667	12.7833678660985	11.1556058553536	13.2709263429498	12.2334578104475	11.4331051337771	10.4704273074216	9.43545621578522	9.48942432395137	12.0242666720262	10.4354773249718	12.4762117247184	10.2590522954121	9.58882046969282	10.7857391958085	9.69607064743239	11.927154396586	10.6837354422505	10.9354105089841	11.2127398079149	9.33739492578096	9.55321799186013	10.9076962278934	8.73288423145526	11.3754378816818	12.4548474900337	11.0714785823755	10.1605178017658	11.4673817848714	7.0644264452254	7.4943953725434	9.34254938440253	10.7589460915092	10.6541268999388	11.3411937202395	8.85564520517844	10.8401194642864	11.3961711552609
4.57x57	6.48x48	16.6452530470402	20.5515869216954	17.2258083409749	18.3935844793776	16.4314788744045	16.5843012816338	16.8597976559625	18.2843193201169	18.4915457709733	17.677037562895	18.8333857285407	18.3543057891057	16.9121620734902	17.7718404505555	18.1446252647995	18.1428203706039	16.3308612142777	14.9284680057935	17.0306103531259	16.0073052697823	17.4592017572397	17.3441656472717	17.3911412793985	17.70281093499	16.3041441051041	16.4832451295247	17.210852535537	18.4526252603796	17.7652436797247	18.0387578563492	18.5206127328445	16.076288439811	18.1088752273574	16.6808984470262	16.6263029564603	17.5952766957499	15.7406135839744	17.789153830354	15.9295861842045	16.1177112829334	16.3170655143626	17.2212624682397	17.653248482928	18.2342359861882	15.4754043242818	17.3004768142384	19.1220862094072
5.46x461	6.48x48	12.0157177896287	10.7062248715409	10.7010546676484	11.891523283415	13.5499690774555	9.68192527341541	11.9992605605512	10.2553729332482	10.3866075308543	10.5983555799945	10.202246713347	11.3656380815157	12.8457009929392	10.778120476224	11.1138031744313	11.4704923608361	13.0802054265214	12.7218755299681	14.5140302466269	13.1071132214535	8.19309715553282	9.98815578572942	11.092612181087	9.53355720599609	9.48817395498207	13.0771410484096	11.2449746109095	11.4531476896092	14.8189568121376	11.54934669148	12.7058083568107	8.96440433046167	11.7272097704441	9.45780069572202	8.11807427903933	9.82539108636394	12.4035547324144	9.44803201730392	10.5920421543723	10.8542858355582	12.7511717892906	11.2052387747874	11.2366451398983	11.5330521979223	12.5475439429396	9.80859694349809	11.5294962595943
1.39x39	2.57x56	12.1172865361846	9.71817776128838	11.7177391163995	12.1849798522607	12.3537243776927	11.4832781033989	11.7519593685479	12.1305199393925	10.7012957159402	12.1128773212643	9.50449583092128	11.278732996219	11.2778306867943	10.4735678734613	9.82149749274519	11.1236333093104	9.7534056616138	10.0757332735638	12.1244599467358	10.1211078939017	10.1677133122448	9.67153317731993	11.4922085779888	11.6125615606549	10.1628490591959	10.1923096989838	11.7692882112726	11.2085366573875	11.7324494458745	11.7126594759687	12.9184958102714	10.0668260141914	11.508740417613	11.1579079580359	9.5662901900371	12.4333346291331	10.395599982685	9.96249752823056	11.6164134310036	11.355313029591	9.84878170130702	10.8807584754005	10.3283670054854	11.1583082050999	9.34271678902877	11.4579187464391	10.63350972163
1.39x39	2.60x59	10.5106411317293	9.35921476407076	10.8446692434578	11.5985458140234	11.2210507529375	12.0090103255847	10.5962854812429	12.3052601354055	10.694458798836	10.6835031707769	9.85700131885961	10.6380319608469	10.256689231911	9.70382584344958	9.93153774598879	10.7794850990203	10.2434096862324	10.6325944623126	11.2690706804066	10.7216279547464	9.50525807119407	9.35430665522571	10.1787683439599	10.9712984190569	10.3928299322177	10.0226653640636	10.9507489241604	10.6611320224449	8.87769795611453	10.8090751685794	11.6711920556557	10.4703653231394	10.7613015941381	9.93946205787819	9.41817068225035	7.2278125321566	9.61782511797756	10.8517754307763	10.8863268828379	10.7634873066307	9.66804768296061	10.563167186029	10.4977264681454	10.847958609803	9.33387797220427	10.9058312383789	9.86868734938948
1.39x39	2.61x60	9.66879066895132	7.10305265361309	8.4648602469267	9.5348212883095	10.6916747986459	10.1931063469386	9.46333588117848	10.710275486653	9.31604046792413	8.9877077166539	8.4495813505759	9.3583978863906	9.05959403063956	7.80266832564348	8.74731444501682	9.63259554844903	8.8416385359276	8.58160229793947	11.1854030772252	8.65109686687185	8.01848900978233	7.74497372493929	8.5697972554781	9.61259907621243	8.48022364091891	7.03889913267693	10.3851712552081	9.45822250742707	10.5500999521332	8.85800547527489	10.2169376038028	8.48332658807852	8.08744125171862	7.95143609670605	7.67685176358121	10.3590923830228	7.07901024155213	8.99394229467812	10.0237690017278	9.92289332805709	8.01149755039594	8.44099081861839	8.51134166862076	9.86472026972889	7.44210857217227	9.26596012294463	9.20478755865664
1.39x39	2.64x63	11.7209474872981	10.8196766125425	11.5639590538881	12.1590389011632	20.9250563201154	13.9467530629892	11.5182355419569	14.2101927150901	12.6223575452449	11.1947366650583	12.041036417186	11.7806392865583	14.5395912253406	10.8069339777756	11.9442835699761	12.3043125366678	12.7325336834426	12.8073722909893	13.4080722328007	12.7054295086786	11.1464659870293	11.0110352374334	10.6674334307742	12.6120618457094	12.0724659452823	9.94662802159606	12.9217191193742	12.0540162601516	11.0102364188967	11.6152126110545	12.1972414094335	12.0455593892521	10.6054471852912	10.6163792792082	11.0180543654495	10.0611115688079	10.1199969367584	12.4252789908316	13.086739891967	12.6583623348362	11.0562496806105	11.6927114477353	12.0139818961076	12.5142719724321	11.3299133712487	12.2923116214974	12.2411867888698
1.39x39	2.65x64	10.4046953823743	9.59070982774476	9.23972440065179	10.0553358969256	24.5721105320646	12.5689871111399	9.69876322012245	12.8869612011521	11.365276327481	9.29539073950095	10.9412897777182	10.1907423183986	15.1641772938726	9.60705662521045	10.617527772509	10.5745420704634	NA	11.4408209495648	12.8856860896112	11.1415318067131	9.84419509152475	9.79247573395002	8.88650679401079	11.2106050238156	10.3335315357336	8.43913093866898	12.3733019036957	10.813384345338	13.007850667962	9.60668652554043	10.0404441136834	10.5247074068593	8.95427361654757	9.10092357950555	9.74488281099368	12.8150174795043	8.28986471542208	10.8886028947703	12.1012976576894	11.2063990648201	10.2576054710639	10.3481864111544	10.8208099974078	11.5146366855407	10.1305205196969	10.3415653553995	11.1817713265833
1.39x39	3.28x28	17.4762010459939	13.8245062479642	16.5964676362171	17.708745127761	16.7970933795106	17.3361972762195	17.153235438249	18.4354671489496	15.5946709808191	17.1437693929894	14.4610883062099	17.2472801623908	14.5123228326826	14.0615660934335	15.0289249781879	17.3730096701752	11.6046696635449	15.695743945414	17.0986573449496	16.4349448128066	15.3308869280287	13.9467710958487	16.8886288371792	17.1541146084547	14.415402387724	16.0593615377449	16.1297011131639	17.3904610059653	17.24335321218	17.1258445923114	18.3006258636146	13.9162516864276	16.7165225151645	15.5400758685407	14.7189620218275	16.2357269316776	12.0172719449965	17.4382952435151	17.1906946049309	17.2059033183382	14.6673843953174	15.0710436267698	14.7396727575615	17.388863648899	14.6487131516731	16.8895258074346	16.2541599290766
1.39x39	3.29x29	18.6484472543963	15.3921776886833	17.5471601690986	19.4487517851403	16.8619558177573	18.4240906424171	18.7089865305419	20.3280871210254	16.9977049627295	18.3545457584763	16.3139468247264	18.4552588169335	15.8737578726652	15.0142477334031	16.8623153214498	18.7210978844725	14.1235869027666	15.6809737580292	17.8086783900434	16.41316575192	16.1353453325301	15.0539617044817	18.0840614354188	17.883812373205	15.1891657769609	18.5167646742081	17.7012907438977	18.7721436442405	17.3214894856072	17.9459115399581	19.5110735224897	12.9523044281703	17.9140443786433	16.2695982740816	15.8469857701709	18.5530821967672	14.604074636895	17.9228360758001	18.7009095768094	18.6114371825499	16.3656246138056	16.1460983212664	15.4939686975287	18.5876815660265	15.7666461557301	17.6084619998454	17.9539318256476
1.39x39	3.32x32	16.6604861273614	13.3482033622507	15.3596120719242	16.5613615684218	15.4017337335769	16.3479183384307	16.85697630063	17.7446097731114	14.9928511964869	16.2373752189201	14.113434557187	16.249402635174	14.0567493041599	13.0124591834134	14.717965348512	16.5965944398241	13.1205012861552	13.8472501602304	16.3439062956198	14.4610684252582	13.952752559979	13.3150943669206	16.1055410651117	15.8718886714846	13.3988040511084	16.3115133877884	15.7601562492254	16.9925004045903	15.0978493170385	15.8393125166467	17.408834711146	12.0565827248022	15.4377863050374	14.8489625563539	13.5004161787702	15.8911238746666	12.8224868102876	16.0684726405468	16.0268378353311	16.1231823471671	14.1794173716694	14.0451266281227	13.4337420326579	16.5874763903374	14.7189224469728	15.8042383239434	15.6949299456863
1.39x39	3.33x33	19.9404101763229	16.8085715335956	18.6118373891457	19.8721154133122	18.9729510883257	19.5655549882951	20.2864909730589	21.1179763471787	18.4148308164914	19.4631657496924	17.581561108161	19.3768386224379	17.6454140784511	16.4867162588552	18.2355852661767	19.6080817011762	16.8350285417043	17.0751439818234	19.6683184080389	17.9326123306115	17.0170567079034	16.8291436205174	19.3980488194045	18.9428070781497	16.5849820620946	20.026292667391	19.1159114090854	20.1481376310566	18.0418488243306	18.8549985149827	20.7193876598706	15.5375639660791	18.5275429023926	18.4540839111564	16.830056981484	19.2578250329574	16.47460169473	18.8423180368022	19.2039517547821	19.2168556481023	17.7465309567814	17.4405128938343	16.8119430167961	19.6172650744185	18.2341895624675	18.9451897852727	18.9108215051594
1.39x39	3.36x36	18.9890765704918	15.9452077440214	17.4781427216967	18.3284176621988	18.4841671979021	18.3928139772032	19.7215589140413	19.7430036721873	17.5567404719669	17.5689980647731	16.9814927494611	18.5513126489745	17.2145299093527	16.8166212123601	17.7931252454424	18.5419923417091	16.8265581150751	16.7564735251783	19.5637384208643	17.0633046623449	16.1802702078797	16.3968385672361	17.9619072762332	18.2673069991173	16.1663905680891	18.6628293139063	18.4097799280708	19.2175440938742	17.0477047428679	17.8180954650041	18.9525910893471	16.4832562923714	16.9454332196023	18.8047032414766	15.8585833856622	18.06516717332	16.6177295079683	17.7416134835589	17.9176481157545	18.3119758901108	17.9663201296203	15.8288672052045	15.5216377035415	18.5301636258291	18.0348900190714	18.1765682404573	17.9553012227587
1.39x39	3.37x37	22.8075559628821	19.6473741248036	21.2755099116331	22.1705736957797	22.2638306676996	22.1852367578081	23.4367112667285	23.4053736137666	21.2095630553767	21.3566319910233	20.6335406801644	22.148107142598	20.9917527615014	20.3817073622403	21.3900676950775	22.2663385629519	20.4541638792692	20.4786406531293	23.2197120567849	20.854646556583	19.9745038736886	20.0923750213856	21.7482712186509	22.0635350068841	19.8969486102769	22.3783973733599	22.2223730730991	23.0086595872076	20.8656269256402	21.6042050073591	22.7460597466902	20.0820356786856	20.7421597959325	22.5113687944558	19.7082839435604	21.8578473551263	20.1804123347369	21.5153825204201	21.7752780464452	22.0900463331338	21.7049240956977	19.7069621453942	19.3167503995884	22.2684427834548	21.6273220025041	21.9573587892533	21.7585121044616
1.39x39	3.40x40	23.7728800737311	20.1489579135001	22.0045960199227	22.8516932851813	23.3738250827715	22.3783479282989	24.5337388304351	23.1744744708483	21.753196960447	21.469736980224	21.3680375795252	23.0405150550069	22.0170766906054	21.4359362986551	22.1872783819918	22.9132619458688	21.8448102761274	21.979943789737	24.7155467873968	22.3623650582849	20.6520373087015	20.6694532099908	22.8429247251748	22.371827596332	20.2523673184149	23.4674284488096	22.4859852797248	23.6759535605221	22.5073400027635	22.2095788793935	23.6295340199505	21.2194257462354	21.9002939249682	23.6501770395065	20.4965739576155	21.9050756446993	22.379258209333	21.5093850679186	23.0655946812563	22.9701475397961	22.3581540159289	20.7019807023386	20.9829105226134	23.1493153462473	23.0888599545322	22.3154626436469	22.8051403415984
1.39x39	4.57x57	25.3467615485687	22.1763469714919	23.8083644335347	26.0552143149888	23.5401782066322	24.4594393435336	25.8908127914131	25.776401785354	23.7633745499245	24.8903247066003	23.0923145873254	26.0161378571071	21.7614136259573	21.2304378664219	23.0914695937699	26.203218943481	21.1766447295127	21.3360859812666	24.7554324341143	22.2720161188878	22.3494515816384	21.878917797734	24.5871482689636	25.3601773653104	21.8205056311718	24.901079073004	24.5987788518048	26.3339246410405	23.3676235205893	25.0483068290054	25.7111711324086	21.5050007905138	24.2839367072145	24.0768575399698	21.7992679005512	23.9223745058888	21.4629650794106	24.0487717981605	25.2176825660091	25.0369683468267	23.1589305884361	23.1361849275113	23.760968183136	25.8953759964979	22.7886121999564	25.0074901379567	25.3769953698226
1.39x39	4.60x61	26.3138490152999	21.0549799809926	24.8138505677777	26.3483630041792	26.9704213352332	24.288784757579	26.9785485525074	27.0009058181388	23.760572383678	29.4883892235571	23.2543778244011	25.3396000955027	25.3009169201434	20.3831546380829	23.1150960845937	25.6942543771949	20.1556727994875	25.5082079731211	27.7082510094015	25.7035563492681	21.9786123538316	21.3578000037457	24.9092371019267	24.6943320014938	21.1249467928324	26.7075725778289	23.6726899400976	25.8959363800578	26.5695841329894	25.3823352156574	26.7450990837574	21.8800330209988	25.2499418415172	23.3687756204727	21.301587945503	24.0758699531294	23.7678142873929	23.5826169031344	28.3971770956199	31.4926576998512	22.7953916834083	24.8257940859905	24.722858855723	25.7174600806534	22.1119214226173	24.3565437613796	25.1984700726056
1.39x39	5.38x39	29.8250558423618	24.4783803794287	27.254828214465	30.2675015486908	27.894852374587	27.8446089216566	30.5113329928405	29.3999576020102	26.5972452896912	30.5626842243936	26.4374324207174	29.9545946559121	26.8190278720165	29.5760723558758	28.0484568024695	30.3483881120563	32.5714110532534	25.4955722626498	28.7753020488057	26.2705476722508	25.0767500685396	26.0131323373407	27.9319209149675	29.4829412033467	25.4318970979359	30.7725924322277	29.2077000292731	29.966091803904	27.4589070612798	26.5433291242828	29.5643739152379	25.2823787646653	24.8750374673085	26.9158664545654	25.0009580816416	28.1859708897884	28.5655261110311	25.2651809809469	29.3798859425968	30.1398412238685	29.8523680467731	27.4614514911357	27.6803772553771	30.5281057551889	29.9870607762748	29.0751337916096	29.019121713105
1.39x39	5.39x40	27.5613629561384	22.7861370574303	24.9528395778917	26.804188273477	25.0941345537159	25.1492049973752	28.1808482129265	26.8654035145575	24.9710275519451	27.6575091611663	24.3892373599504	26.3343998792454	24.1744108718289	26.0856348207208	26.2357778043648	26.6775813933722	30.8988765167926	22.3570195017135	25.9614560647125	23.2360522034187	24.1733840618148	23.7398563180151	25.290679033984	26.8091689352729	25.4807261670463	28.1898964524526	26.4823926789103	26.3435464772684	24.7112830302273	24.3465541093601	26.8320972158346	23.5473929130169	23.8507761508929	25.4677440500724	24.495893227233	25.2923492186867	26.8545612140657	23.2642913281277	26.9221928527377	27.4165095699653	27.3305442682725	25.2411875711108	24.9924213512817	27.0410828555367	26.8110136138118	26.2854887342807	25.5308506908798
1.39x39	5.42x43	27.9732811268181	21.4436118459554	25.0704298726607	27.3603594640129	25.7535231958658	24.5613122206449	28.4954728334169	26.5018126549864	24.3562391801362	26.5836476992906	23.8069563153293	27.4823195891468	24.4219000489315	24.5654619537268	25.240205030863	27.7444961568957	27.7885090280137	23.3297160291333	26.7045586745035	24.4919249753873	22.16062555525	22.8299770039306	25.9011957639025	25.7361184719064	22.1636448942858	27.6359051416812	25.5430905138748	27.2398973566348	25.275965382157	24.8236016323176	28.5524430303258	22.5439758250403	23.1884475547631	24.9967904739789	22.9154746186938	24.8048539201504	26.2548600262885	22.6154209777311	26.3449338013972	26.7751049484404	26.9995939599098	24.5295706648119	24.3653731758822	27.6504599961737	26.6782649735698	25.4518348650937	26.195790463355
1.39x39	5.43x44	26.3243895655721	22.7020373535064	24.6326235711911	25.649142890163	25.2661981508893	24.1140637180878	27.1949254825234	26.5557329968502	25.1402101423198	25.2873346361375	24.3090747870008	25.5303039739052	23.7124028727584	24.4610810268066	24.9862697095825	25.6023339951654	27.9617777689474	23.195158374109	25.9044679543896	24.432951950184	23.6876077517338	22.5467380567567	25.0456264844783	25.1869288917883	22.5575587553263	27.3737058141568	25.321223054979	25.5937950488004	24.7810961420192	24.1003829637622	26.8342503155948	23.17344393913	23.8339581689656	25.4641358188335	24.4236456123978	23.6099366581107	26.8009221110021	23.1051800685474	25.472120563471	25.7190128893004	26.5394772555904	24.659554781058	24.1075673803891	26.068920384243	25.7094367305081	24.7126337123343	24.6585950329697
1.39x39	5.46x461	26.5292128793901	21.0958864473622	23.7760283268674	26.0758917201311	28.9513506766092	23.292265948164	26.8713279537875	25.4794889666178	23.732252168726	24.5627944257163	23.1280559710495	26.1255648168609	27.0601773275786	23.7508039863917	23.8215127353407	25.9749778633207	24.3650321978035	25.4220381755673	29.919827238806	26.5405756719782	21.7534522547572	21.8505546382695	25.0922128557846	23.4268826351267	21.3676456353993	29.6619696412764	24.6517867506597	26.3086076408464	28.0382858784199	24.1904247792386	26.7323543482425	21.570611535142	23.8164759147948	24.5833748293435	22.0892775119514	22.7027907095141	26.1076608297258	22.3296092666218	24.4525134290935	24.9110865680323	25.9844304728813	24.3564772904458	24.2176439192585	26.506609836039	25.5019169083424	23.7859895947173	25.3365144208907
1.39x39	5.47x47	25.475224140329	22.7088060892685	24.0615322870344	24.930140212201	25.8702672000117	22.9215132790137	26.1182677067221	25.5619805570695	24.1428987489075	24.1621928019789	23.3576198487774	24.7268961861371	24.0129567941976	24.7395015713737	23.8499422640811	24.5130543588513	24.5219551830599	23.3756759474459	26.9603892219678	24.5095453446203	23.6320033217669	22.1101971949596	24.9052592437822	23.5929862883019	21.8368189533183	26.4641231481415	23.8779784948391	24.8655975395726	25.0433304893738	23.4634798356936	25.7349661550195	22.0844763804805	23.4081597738908	24.6807164806859	24.1377330335721	22.7590382266035	25.9216734606391	22.1304815356557	24.2775092009044	24.2215653086253	25.2118402541346	23.6270492867814	23.3565402831841	25.0677557431853	25.1875336823596	23.3525815703532	24.134805178414
1.39x39	6.48x48	18.5372289730693	15.3583261457751	16.9735799406018	17.2761420751278	17.9658935764409	16.2649228710129	19.5918300829708	17.294656457993	16.4227949204756	17.8921798839605	16.0001789052498	17.6005037996076	16.9469074759969	16.9601232601653	16.0428838430003	17.3521053477669	15.7971448686147	15.5612660153344	17.9696477984406	16.5613372648467	16.1819020513659	15.9435018110828	17.9755614933164	16.580154733898	14.9445999946469	18.9685821557648	15.9264350687779	17.8140282923319	17.0480405325656	16.2263772296838	18.6106880313437	14.9163832412552	16.9631395678984	17.6917611898872	16.1757609094596	16.0782351643456	17.65550899861	15.2823522076937	17.8076347109884	18.2370312551139	16.7738844934619	16.4521819221646	16.2964474963104	17.6875468055918	16.1342274993258	16.2876139750425	17.3634495132736
1.39x39	6.51x51	19.1760185127153	15.5102020941057	17.1504101700222	17.4950437838835	18.3270748893543	15.9045739647436	19.9443208457947	17.5055458069721	16.7043760434205	17.8281519232926	16.0011598954576	18.0356007108164	16.9441142878582	16.3617468810638	16.4060103011061	18.121845849692	15.7199850508835	15.8960243457287	18.5591841415511	16.5822364293843	16.8256576394505	15.8410058077131	17.9796382054812	16.4940938823568	15.1649234089724	19.3902218141	15.8018713765174	18.1270649858161	16.2680814480381	16.4182992420043	18.6239852341007	15.0172062981102	17.3712588490299	17.5707342191498	17.2094561506167	15.7892896926999	17.2090748443953	14.7511928331237	18.4323448589701	19.0239724558253	17.1002712551585	17.5190900734028	17.3911051115218	18.4113996480441	15.9568549532795	16.1107624586796	17.7189950617974
1.39x39	6.52x52	22.359226708453	18.9449095273638	20.3900334722629	20.9910985181815	21.6948473145123	19.5190411905913	23.1437629395049	21.0103582311202	19.7817699410341	21.2352864120077	19.1172213723648	21.4903579774745	19.9987531111317	19.6985789081345	19.540701266843	21.5288347339098	18.5693577971884	19.2416954034721	21.5723977341417	20.0188132015862	19.9895148765547	19.1765065900961	21.2733343413768	19.8920308163847	18.5559268159799	22.9500883440565	19.2691748655722	21.6412754707295	19.6384813567648	19.8068500776878	21.9832113441144	18.6257188317659	20.7328170300131	21.0691122024636	20.1607703721857	19.3268415422697	20.4174787131027	18.4620564943345	21.5119752928456	21.9968778239095	20.2860076653835	20.871300606335	20.3278038902386	21.9122167066685	18.6021581812434	19.5735757080815	21.0980803392157
1.39x39	6.55x55	24.242799611431	19.9342025172817	20.226111588736	22.4632072732279	22.5123074339349	20.2982811341256	23.7322876057071	21.9525526078404	20.7959580207309	21.9301395116401	19.6983518346079	23.3781966370377	21.3607711705359	19.6443187461413	20.1042760128287	23.5692966802151	19.2002878624254	20.7917662789865	22.6309420926306	21.3210169551079	20.9790219266771	20.3475838860539	21.7504170304847	21.1757075442593	20.7491405846122	24.4042003556765	19.8961887305082	23.5037921621172	20.7953828769754	20.8995277697847	23.2035434578428	19.603209456617	22.5550542894492	21.4579156490093	21.5623964577224	20.4219759328034	21.19890813226	19.8075687301597	22.6828417311412	23.0553181283625	21.2746093031106	22.416408521438	22.2834206754708	23.9790719169863	19.5684394114605	20.8548465350383	22.788460610581
1.39x39	6.58x58	27.394948786227	22.9810806969559	23.3690516067726	24.7281472415545	25.4377484066495	22.7796712443354	26.3389664565639	25.1794579171197	24.0079384371087	24.5961708605222	22.3016632115186	25.9577455877817	23.9592922683455	22.2044294905318	23.2888484902109	26.4607610245813	22.5011569702538	23.8135062727016	25.5046107400211	24.2665246996763	23.9117398363231	24.0066268767605	25.380236602522	24.4012735733199	24.2407677271162	26.2614136710117	23.6564548907904	25.9393386769979	23.6237316273276	24.1846365695249	26.6929618064388	23.027562202717	25.3211848656417	24.2314304365219	24.8241426438054	26.1359734083122	24.6889838997072	23.2822810308612	26.7675999858037	27.138903644031	24.3996539319721	25.4091350895697	26.1704137720442	26.7963565806996	22.8229614861876	24.0160984341754	25.7182169871863
1.39x39	6.59x59	30.1566488357045	25.5106388983106	30.2971243684941	27.5277390644419	28.2805112223948	26.2147228480486	21.3697169377603	27.4497143518835	25.9815299587996	27.6293068316959	24.3810539763973	28.9480302784145	27.1205182288245	24.8701977475049	25.4757558082189	29.8248110304156	24.2129316894919	26.2301628092545	27.9571176447072	26.7120495095378	25.9083492720011	26.2389984755516	26.9557037748971	26.0627018169644	26.6376700369984	28.8710223061117	25.4853662520278	29.2539690640433	26.8336544659873	26.4110682290588	29.5315281182671	25.2374771124215	28.3914669927427	27.1752005144396	26.5994480017913	28.7836988241609	26.5396304797184	25.9429075856967	28.4476431536955	29.4395653160844	26.0995111256897	27.6923360155838	27.9950440256843	29.6766775431483	25.8548048145794	25.9498163577317	28.4241940255128
1.39x39	7.32x31	19.0856019554008	17.8000553089028	17.092658014481	16.0870253620736	21.2639839399864	15.8202061617414	19.3025312847823	17.5789148129229	16.6500616815674	17.4172290276037	16.7685134105561	17.3869494449141	20.3862114185054	17.6405449462311	16.9159085774309	18.2316971508414	18.2982995384817	15.5442508986442	19.5723015509163	16.385613232345	18.939242434691	19.1695663748557	18.3814059309945	16.8291519097072	17.5409344391911	18.2533471451129	15.4363558847288	17.4519189202792	17.2179061154369	17.301457770951	19.3998849481125	18.1462751274194	17.0268349084614	19.2911877809532	20.3705790295711	15.1262855652007	17.8105443768572	15.408031606925	18.8350635252446	18.9308319151589	19.6154300997964	18.6519670544423	18.5670329347475	18.4095216667897	17.9197079775313	15.5307272205779	18.3846857193698
1.39x39	7.35x34	17.4677528320045	14.4593113943922	15.1374214448829	14.7091912762055	16.3135724475052	13.0832935455871	18.0658813513208	15.3797132938166	14.9974915569238	15.3636137025115	14.7847411204931	15.6090231917311	14.2445337235025	13.9905131785793	14.6916922442583	16.3483968021332	15.1765804119373	13.5138353179251	16.462148128358	14.5718871118328	16.3857124654377	14.9289832540599	16.4026491153106	14.5198832984291	14.7825446050401	18.0370323778608	13.4902136751054	15.8000631011398	13.9873644765553	14.4520883612023	16.5431601878238	13.3247116666741	15.6587016383862	16.0020351518174	16.9120623816257	13.1527199088249	16.0949735631967	13.0235001439705	17.0490737871592	17.65258544803	16.266992500152	16.3267723080834	16.2540646608779	16.5079679548998	15.1440505149712	13.8540262017942	16.0574565233726
1.39x39	7.36x35	13.9698510371442	11.2611612633867	11.4960892915809	11.1325706375482	12.5495105083824	9.92546009009154	14.3890079574653	11.6848194680106	11.3792395615876	11.7254871114167	11.1957378050756	11.9631505465743	10.6663790013294	10.2932918446919	11.2468563607792	12.8383641091846	12.1617157095535	9.95305129093586	13.0896785292841	11.0936398895944	13.0791911064867	11.5158330571435	12.79778094046	11.0637771579149	11.8397277418022	14.5798830242221	9.85490390617788	12.1010099578506	10.7387262745635	11.330220209687	13.3940200462744	9.79470821413277	12.0495095750823	12.6548522314565	13.8998861146414	9.63604550632676	12.7212057211571	9.50500557601099	13.4883672473728	14.009821412138	13.3152939509423	12.9485547069934	12.8043599605759	12.9312649419923	12.0749991304348	10.3026424280376	12.5088880401097
1.39x39	7.39x38	13.6141697506679	10.2552080915016	11.2495049224399	11.7708382879046	12.1026160808314	9.33140637846193	14.4908884820773	11.4117795281893	10.791868281257	12.124166198135	10.3680475500453	12.2942748057785	9.93326758926789	10.2375359340029	10.5812186916253	12.9084108239551	10.4455358407312	9.1919635551932	11.9063880753149	9.94620319518961	11.874250123692	10.4094814952523	12.0734078867567	10.1028591992564	10.5021423052632	13.3653973379021	9.88749250315771	12.4867839334234	10.2404017011053	10.6868592205568	13.1805407324586	9.33460449081802	11.736548640891	12.0341648650831	11.8941285515165	9.52973158068998	12.0707148918364	8.8159937046257	13.0605779734283	13.7894579298825	11.1438456557869	11.2872381475718	10.761761426458	12.8727477253304	10.8036818261184	9.84766967358268	12.7160173010263
1.39x39	7.40x39	10.0523844932434	6.71092013065273	8.23114530305473	8.28386274632795	8.98243307795833	6.76324456159912	11.131994250807	8.30191128596301	7.60230787327112	8.74881992042355	7.20220424592361	8.82082195716476	7.57518481622726	7.31825839937345	7.27970116144886	9.21135961734206	7.93899653608691	6.6031297124924	9.00499050526984	7.55029012687592	8.52218129354217	7.36157394855204	9.04613823683897	6.95201611045314	6.89906645858699	10.6747125956627	6.83409481935976	9.1760574322527	7.44362049005724	7.32892393192889	9.7900374871601	5.89629858470549	8.33827925893586	8.46935469796844	8.67915946391124	6.68569973899516	8.56338770580896	6.02840766703779	9.49519889207172	10.3530838400933	8.41907102951389	8.03386936662527	8.32393758986695	9.25963206612444	8.48151319046313	6.74210656990825	9.12018086443465
1.39x39	7.42x41	13.7487020841969	10.5110235943033	11.884307888977	12.6091774910182	12.9001168211765	10.1913191982196	14.7168490173678	12.1730077220053	11.1712574493653	13.1850426241253	10.939804614343	12.8928897071215	11.6458159010007	11.927451110778	10.9599331202339	12.9097149465044	10.9235874601708	9.83945084849759	12.4568021979961	10.9645641044229	11.2503139956181	10.8344093978398	13.0095057938417	10.879700041821	11.5701133097304	13.4402084805259	11.1855518415499	13.292059923127	11.0238007057457	11.6276899683471	14.0378303523016	10.102011383878	12.2909967455858	12.335258246182	11.4581361049693	10.9290920940397	11.8005857905445	10.8146170066258	12.9351346726658	13.4466785861788	11.2308141289935	11.0170981206487	10.6750791566152	13.2987321200181	11.3796714803196	10.7575483266402	12.509502987729
1.39x39	7.43x42	10.7975255035587	8.09070590245375	8.95515628004336	9.86584633977237	9.74936085084555	7.28828614970625	11.5655157688708	9.04890811092697	8.21318975794423	10.3723687747785	7.93335042715246	10.0948906878678	8.3947340636854	9.37818943080166	7.88514806455782	10.2727065566967	7.58674172487768	7.81429389004534	9.43820464919044	7.81049307022291	7.94534385662446	7.76860399299643	9.9841303577227	8.14000651105391	9.27313657831049	9.77322572132661	8.29663956068961	10.4047017737175	8.28110463646004	8.96262422508051	11.3747171393402	7.41634465218547	9.43504223625946	9.2243238234572	8.14220467686731	8.22360054963762	8.77253424045754	8.43146725072214	9.85546645268503	10.1427872402018	7.85369072474846	7.55181620539059	7.11677237236094	10.4884232370743	7.92537355586474	7.93210924029668	9.49297708835326
2.57x56	2.60x59	5.90724690528507	5.7722818711494	5.67025898879407	5.64008679011237	5.09039389438578	5.56062523462964	5.68410371122836	5.12092852908533	5.919878799435	5.94080676339502	5.62108441495055	5.3819630247708	5.54704290590942	5.72739277507663	5.59247360297749	5.40066375550265	5.4191157950352	4.91318857769575	5.00823611663827	5.29744721540479	5.5407707947541	5.55635285056663	5.95731239738189	5.35990027892311	5.57633759738415	5.86915394243497	5.47674456223768	5.44699678722138	5.49141921546698	5.37705848954612	5.68580249393171	5.80235486677607	5.47870696423892	5.55709654405968	5.66759516902892	7.38058981382925	5.21421470597443	6.08094639016	5.62323376714858	5.78913024555503	5.48723290921754	5.49516096215571	5.17655078213283	5.40140500240446	5.67827130383887	5.27225198563195	5.64348589083024
2.57x56	2.61x60	6.25937409011476	7.14250194259687	6.52283228360196	6.20050522135092	5.91165171504547	5.93477623841034	6.06618438559198	6.15129522946185	6.92980576928387	6.16641184158178	6.36026760443301	6.05827277365422	6.45439423958593	7.4075059905477	6.38973825755015	6.02084886041827	6.2913418282589	6.00000891666004	5.73723147519777	6.32671589373191	6.58949846346442	6.71644682849496	6.10373762542264	6.14051243789963	6.9620027291003	6.78356189623121	5.93378639655996	6.04653925812113	5.98615026540431	6.16521573020766	6.2590211694801	6.34357911592502	6.50118250782117	6.82518234188655	6.54630284970074	8.11664518135418	6.19224942973069	6.26420186456343	6.32547563429028	6.62083574784936	6.21308120017757	6.53949439941652	6.30133858795097	5.9689737811453	6.94139560895358	6.12595225250736	6.0898284869116
2.57x56	2.64x63	10.8153371191101	11.2310338348702	11.1281921712379	11.3179563968059	15.4960301367802	10.6649167366651	10.9262363602478	10.3970988742052	11.4388840364784	10.9308606248548	10.9853694066244	10.7883476955463	15.9043661300914	11.3913143227636	11.0086905215834	10.6084319764987	11.4450589338806	10.2857580177642	9.97821897935699	10.5839490739516	10.8056443583897	11.1207144105044	10.7178946626658	10.6171074215155	11.0501059270941	10.8806015458705	10.623343635598	10.4920702437603	10.6718432334813	10.4956777770661	11.0530026689583	11.1568046052622	10.7145836130015	11.1845492086181	11.0324551211414	12.8185149685913	10.2952840174519	10.8939981182301	10.6764204675537	11.1242179500404	10.5138346001827	10.8301059089928	10.4017835970568	10.5104409517394	11.358577639828	10.6343388605028	10.6653931479341
2.57x56	2.65x64	12.6789906932689	13.1226443981387	12.6989885030265	13.1601979468396	16.9722399818056	10.5933770347326	12.1662198319774	12.2371616398575	13.2674019310489	11.8806840712141	12.7478917864877	12.6122751714352	15.1267449241402	13.4408074534233	12.6208017574162	12.1682596126151	NA	12.0794808249361	11.7420155424867	12.222974187979	12.7100119984208	12.9555903377654	12.3663175197793	12.1511897771371	12.6301056606823	12.9325863615906	12.3391536581728	12.2158920673032	15.3755610304145	12.3736174985329	12.6508011604009	12.7219955195716	13.0293916204864	13.3706405231762	12.7563713100552	13.6147879528107	12.0846584560756	12.2896039806008	12.5305673454956	12.6565239303689	12.858555012131	13.0327897627484	12.6074526372301	12.2183681398131	13.0850822313045	12.0867087331498	12.0436536399882
2.57x56	3.28x28	6.32871693157468	6.4215124386705	5.95372186115542	6.38476608811944	7.61752847057364	6.45324259578082	6.3851248225857	6.63592653666389	5.84998299142827	6.24057112770939	6.05874392923154	6.8144376877333	6.71028799680014	5.61348920013212	6.24974343473394	7.07330439045288	6.02917656069218	7.84704740650903	6.78487715437796	8.2481645230924	5.91280677851052	5.77947281332823	6.38743438322461	5.91350809587676	6.25908020399164	7.34762587507012	5.07276029396225	7.1010978024528	7.81042649283636	6.51957030792674	6.67451309085539	5.23990620145056	6.64256433916902	6.11774729782131	5.81182682123272	8.45639905633597	4.11255565311887	7.98765497502239	6.11739078365932	6.63932564346711	5.83083184459987	4.76131042886304	4.88583994825864	7.10164241566696	6.58675124777002	5.76107750338424	6.3867583326755
2.57x56	3.29x29	7.98162915700798	9.66922773545023	7.86320659782	8.75343795317017	8.53279719669934	8.64217472630587	8.24278120539421	9.46433938529257	8.72060984106043	8.15407536143738	9.23653722993634	8.31324401181633	8.51496294765867	8.71314105245634	9.32131154934755	8.79049657300428	9.6688239719213	8.72862927383218	8.87698805902092	8.72258889321284	8.11602926313107	8.73768556312255	8.40716884569354	7.71785365240881	9.02193626667801	10.1959859258436	7.71559012649065	8.74389358352445	9.31362228136829	8.27688184040343	8.21661183213616	7.09139506726286	8.40824274150075	8.45630072785967	8.16092972644661	11.7004653326267	7.14586502811241	8.33099561877211	8.1962780577528	8.42607892201349	8.83736069197132	7.39910062102145	7.33294572460481	8.57214115609397	9.31344780411636	7.45485117222336	8.10748598518677
2.57x56	3.32x32	5.76663602111317	8.69050550888727	5.9334887713722	5.90744911108001	6.27771216288227	7.30537651322641	6.06558364875137	8.14157343515367	8.03451958738044	5.71323769853837	8.37614338463711	5.71709873974554	5.59514289361764	8.44813506047341	8.43964697128973	6.3236689508544	9.31688316981597	5.31256567018234	7.60766613357868	6.12911453637473	6.52181370479102	8.48664385961847	6.49614693491457	6.3659437634965	7.9843294646451	8.03448131493253	6.52488268093764	6.44328813572697	6.36489010117221	5.97441687531093	5.49926231416542	8.39518891985166	5.50034544369715	7.93672659224192	6.50451297177583	9.47030675321555	6.61013244950508	6.35256751243149	5.89710623950425	5.85053852222169	7.81145889062984	6.77958737682464	7.08924015674459	6.12131529983549	8.69068530094146	6.13091126995	5.65841682805358
2.57x56	3.33x33	9.59415910854099	12.324691071179	9.74189042229484	9.74427570422758	9.84721285440708	11.1086050429386	9.87897854031478	11.8649216179459	11.7461849976918	9.52434323195043	12.0732970641826	9.45592285290019	9.21199006729817	11.9636750624547	12.1556569135526	10.0059471315813	12.6228230598389	9.15794196312687	11.344463407319	9.93443033092487	10.3112399351387	12.1570761698691	10.2917606851306	10.1199625493378	11.6665069750976	11.6956201631209	10.283848695892	10.1508103124824	10.1427308452901	9.78133145333497	9.23856877443687	11.6962620524679	9.2462229045162	11.4639272066775	10.3253045475666	13.0879482349221	9.79237836278807	9.66061985588917	9.72171661796413	9.61228656460053	11.5427755760909	10.4710315155671	10.6961313099644	9.7978480800633	12.4363410213776	9.9340232534457	9.38356803140469
2.57x56	3.36x36	10.5680897990129	13.7615200105221	10.8682191273456	10.1875219754364	10.8752359514633	12.1544942305305	11.0784257455651	12.9552340773913	13.2603222434449	9.49438813194405	13.6622475822977	9.98829479941396	10.2373963975222	14.3930880981115	13.9047431116148	10.3224999878905	14.3381960511077	10.2316920399316	12.9004079780447	10.64117939892	11.5301142231983	13.6758960583941	10.8844963595014	11.7919177829563	13.6540737144634	11.8816892317549	12.1948331681905	10.5327540083304	10.5059493145551	10.7006733432995	9.33467969455835	14.2617419693388	9.51943911162837	13.4187018000997	11.4061104238036	13.4236448478049	12.3360776991716	10.2594038813179	10.5786854098229	10.7616000204431	13.6422855123326	12.093735981904	12.6373050133326	10.177352995745	14.0222039993719	11.5402941470311	10.1008479347033
2.57x56	3.37x37	13.5982262813942	16.4488244260798	13.7076418832708	13.4850434926996	13.5430495088809	15.3150471758986	14.0100627407589	16.0594796304239	15.9923485767413	12.8754335460986	16.4266790313806	13.4482198822	12.9758657899964	16.5695642368772	16.5418869842591	13.7980150384032	16.8150590245767	13.1031856431938	15.4396812467097	13.7522090589112	14.7692819392142	16.4205122331796	13.9509056695255	14.7915655358045	16.3643811065375	14.9049255617061	15.154610453588	14.0015701262394	13.7359940666848	13.8169720995593	12.6701618774189	16.609940066117	12.707252614157	16.1293740424109	14.6241918751089	16.2269832378049	14.5346291662361	13.7258220154569	13.7071087031511	13.7847140340306	16.4734327023848	14.9661770669734	15.3278948652449	13.588600884565	16.63968695619	14.4576541319814	13.4593501329002
2.57x56	3.40x40	16.8052745886522	19.0222883481457	17.055671959791	16.4801174146303	16.7130622268931	17.9628466563627	17.1161632382961	18.3840025293732	18.8893809850932	15.4528371828606	19.1833055285058	16.3698032364473	15.7450356938306	19.6132318856429	19.3692098186787	16.3606223292392	19.8852685674597	16.2592076682722	18.6921528990109	17.0683212414109	17.6579480404717	19.0182611718317	17.1364327092893	17.6245677393802	18.9560610623621	17.5949224778059	18.009996807329	16.538164982851	17.2961689977868	16.7657083954123	15.9483895111701	19.5679792262768	16.0029295443053	19.1182937000141	17.5014400550355	18.5492477745056	18.4117099966299	15.8834578414148	17.0967594882773	16.7641687536245	19.0221589205852	18.6038143938279	19.2667499334994	16.2966635542371	19.6766510616009	17.3920138281914	16.4957690636114
2.57x56	4.57x57	14.1058222021972	15.9589377466046	13.5596841777381	15.0322041298008	12.97879963633	14.8727430220521	14.7133901599869	15.0730557950271	15.2590801164421	14.0977502105832	15.8184840613758	15.635855876798	11.7971405857521	14.7168815990345	15.3068151161501	16.0598026451137	14.8915805742708	12.5065594789294	14.4608221757962	13.3621510618613	14.7618702744605	15.6719800280628	14.3102594665506	15.4213941652498	16.0512275854528	15.5038293979262	14.4637544918323	15.8050503637287	14.3364172302567	14.8359863507621	13.3099462433174	15.4800334947958	13.7505424620267	15.555942947954	14.5132322037512	15.8418802545657	12.9297539419743	14.4771091727596	15.1828346826276	14.8365026202269	15.8132365124917	15.0987334568168	16.4632586081857	15.503730325312	15.6696449544972	14.9867130819269	15.232493722303
2.57x56	4.60x61	15.3175905089541	15.4984380180714	14.6774187785182	15.5753511998927	16.6122567100319	14.5878154978736	16.1278226986782	15.3481339908147	14.3305676789163	18.9725595004997	15.0285764129541	15.2765719649403	16.1038727640279	14.0120762558587	14.6663081244054	15.783889064486	14.4273773777496	16.7351002685971	17.2148321223299	16.6677653571197	15.1340745009399	15.1896707995927	14.7417023779481	15.0077177811951	15.5162042394395	17.4725792600864	13.4005920018483	15.6989624179434	17.1409442855404	15.4358230425203	14.849240552971	16.5779721618779	15.0571637767542	15.8291114722211	14.711688312359	16.7636679757146	14.3193221557447	14.1572275887619	17.7015068850084	21.1101542154481	15.6733837125236	16.5766584389014	17.1106205907325	15.6531400364272	15.4355420377776	14.6300926176152	15.151937070883
2.57x56	5.38x39	21.0673129041176	22.2650847966047	19.5232278325076	22.7038887858446	20.4099859137629	20.481367581292	21.4871096241444	21.8452834497518	21.3979923123643	22.0826219910589	22.563095044785	23.0728374284569	20.4479745940765	26.5013249480097	23.7243575676982	23.5712285000167	28.1154762364076	19.317095692676	21.2097170419598	19.9844977419999	20.7005509588513	22.5726686503834	19.9063740043233	22.2361301039547	22.7849098527951	23.1604888981213	21.1829579143235	22.8619450616084	21.592393313387	19.2527578543958	19.6642443790754	22.6789037213001	17.5367157985753	22.0176345913906	20.6629106613759	23.5730742373582	21.748713180324	17.9519000387146	21.0854179232948	21.946446477733	23.7469602896876	21.9634518461921	22.6082565006681	23.5834542635298	24.4723009747755	21.7180248411314	22.1620638479362
2.57x56	5.39x40	20.0152109406821	22.0600614913014	18.640482209428	20.1755707973777	18.9408608304903	19.0845356244264	20.1435754770597	20.6482475285434	21.2963444046155	20.2924787544548	21.853142428493	20.0028578208215	19.1296396202333	23.7747794101228	23.2153621552626	20.43131628163	27.5170656139059	17.0993900476011	19.4896704435965	17.8098818918038	21.3151002108834	21.6753801812102	18.4418698075873	20.7681612330028	24.658353087747	21.4396530988727	19.6581704387769	19.774620325053	20.215592224815	18.5101004049141	18.046009891386	22.4853965719976	18.0061617509118	22.0933786687324	21.6063069727337	22.1578991107009	21.2854419028593	17.1581342225779	19.8325748454405	20.2049954466711	22.273020922183	21.1930058981731	21.1544021423438	20.7786957242268	22.019989782014	20.1390082675389	19.361749765969
2.57x56	5.42x43	18.9502482833339	20.0521311086877	17.8200284511557	19.6932412771489	18.6053978457866	18.1578046580527	19.1444565605817	20.0387660797765	20.059621656452	18.3540840686753	20.9533334340863	20.2348774644177	18.2691948645801	22.0823363120844	21.342292543211	20.6003618657537	24.145914519852	17.0833521593392	19.3622916773816	18.2339242073669	18.788415499983	20.1823456515837	18.228027978912	19.197089518987	20.2199772007784	20.3724296538238	18.6201933931955	19.7500657720424	19.6154820486268	17.8016086351768	18.7085624514552	20.8806252301027	15.8139847603316	20.4120581029939	19.4562525939606	20.7639251106336	20.3120640014746	15.9517177444939	18.2657300428973	18.4625459511954	21.7182208065025	20.2897662874662	20.5871980852179	20.4489551322311	21.4568354842926	18.7953825712594	19.1770559523614
2.57x56	5.43x44	18.6243729827342	22.6283597947355	19.0991983601407	19.5862926813626	19.913017476013	19.488985940782	19.0030218912677	21.7736145139019	22.3633670541804	18.6904663933247	22.907604545216	19.5699455543443	19.2620064115865	23.5777194189769	22.5536276682932	19.6724054960241	25.5788926656335	18.4225208101389	20.2241402536671	19.6155902281833	21.657246985709	21.4986856575001	18.9790328520713	20.3323683077009	22.2221106558311	21.3144305342648	20.1084417098889	19.3967411953658	20.8542383222212	18.8003132686666	18.3677975271942	23.0484037191299	18.0405543152088	22.4028282812684	22.2131463102371	21.5517573529399	22.2132249122004	17.8950490080357	18.9647344563535	18.7662806650652	22.611715459027	22.1193324718446	21.971858865376	20.1621781065439	21.7165056120915	19.7674075437322	18.9806369229275
2.57x56	5.46x461	17.6677072932512	20.0763045902377	17.1859181017483	18.5623520330803	22.0064445106428	17.8684198797767	17.6232635740376	19.7811512304011	20.0965068357663	17.0096721014839	20.6752495510937	18.9880186170121	21.0301093197349	22.0444641123344	20.2363879682121	18.9627559442187	21.4539230445157	18.9737061745986	22.9637591217118	20.2814894423462	19.4248651217969	19.7884484990613	18.0489858994903	17.9173137495552	19.9414540342474	22.6743215554512	18.745576678246	18.7904780673617	22.4313616394547	17.5402548157089	17.0967457429769	20.3981828112212	16.3006251720601	20.1325989877114	19.6225110778412	19.5349935244422	20.5410570565392	16.1331099605749	17.0526597925368	17.146487978592	21.3156378745746	20.7613549894991	21.1846789921396	19.3581484910102	20.6888013427555	18.023302388852	18.3366891777114
2.57x56	5.47x47	18.1978546537772	22.9198998470761	19.2255206951593	19.196447405705	19.7435916438727	19.3804252533323	18.2772168833223	21.6310963198817	22.1509830481629	18.4550772959638	22.4294324939353	19.149349257873	18.6829349675044	24.5002461620287	21.8114187754946	19.0548066901766	23.0743414640592	18.2072617106472	20.8223108707943	19.5591211459002	22.5860279155056	21.6867252022983	19.5242358621279	19.8951741384689	22.0501646932625	20.2207202888522	19.8000118686833	18.8498437394054	20.3576808600587	18.6878395219993	17.770269581523	22.5504968237953	17.6589813409494	21.9258741216855	22.8367460028788	21.6494046800368	21.8187508350043	17.5424132319359	18.6241892709455	18.0993896582178	22.0056645889189	21.8207096814013	22.0159924827385	19.4167591528556	21.7357702877078	19.4211078983667	18.6373655863698
2.57x56	6.48x48	15.5636026998892	19.3510436152679	16.3862218342118	15.7867654381764	16.8260542611748	15.9055524896182	15.7506038296949	16.5935826752392	17.7896998007274	16.2114913564422	17.8835249881001	15.5153996403573	16.1128777690393	20.2243342782896	17.3712312459422	15.4199070684619	17.9828874211012	14.3424811312409	16.8609381411593	15.4867444287042	17.8171324292098	18.6066502627421	16.5569557890332	16.1782736099993	18.133584753159	15.8143940130503	15.622727322718	15.2607172177457	17.9227186553826	15.9372439901007	15.7983790624228	17.847837656142	15.9796786575951	17.7123634221975	17.225116458242	18.7526752758106	17.460867246503	13.4388310503555	15.9776894762666	15.8422435595467	17.2641804323287	18.1264493213646	18.2539348634753	15.4343262243611	16.1425991091893	15.4860583429096	15.4768235113023
2.57x56	6.51x51	16.4636220498407	20.2922158967423	16.763040386517	16.6176931311178	17.7121913381716	15.2277326283331	16.3082483731393	16.4993378655024	18.3065684659906	16.2750009523809	18.1666794158977	16.3157203641151	16.9452858931326	20.4090415502541	17.7057424865494	16.4416323702971	18.1912520184841	15.3845159494864	18.1852695608286	15.9532155379409	18.6423306751061	18.7958487172035	16.5141048803742	15.6033849212278	18.4580039278358	16.005857521545	15.3329331179654	15.976097677468	18.0928826890576	16.3604740151378	16.2604986393407	17.9651999988867	16.9238926964218	18.422944960022	18.4161718334729	19.1097370206918	17.3366098762128	12.7139911514835	16.5017460894294	16.6902866961595	18.1128051389066	18.5106134420229	18.740336603167	16.3491880226512	16.356781865636	14.9120591804083	16.2449885503191
2.57x56	6.52x52	17.8667661875338	22.6666169950436	18.1535894797696	18.4336218090748	19.4066599393095	17.279569236529	17.8955543641431	18.5788880991302	19.7844366611739	17.9111862812043	19.8577364268942	18.4366458446215	18.0208835798914	22.4317867990938	19.4451116993449	18.5296295969455	19.3538666679297	17.1571361537991	19.2628950316405	17.9456342601759	20.2919092004671	20.8241489381919	18.1475442415772	17.6567862307952	20.6178962311871	18.5796562400923	17.2183105152625	18.2106658307707	19.6193945370391	17.9859314465501	17.8442872370964	20.6677790292039	18.5770622004665	20.5058152483631	19.9117044473847	21.0725421817113	19.0191607070344	15.2813880586811	17.9270475539058	17.903767145492	19.7757117191771	20.6739716068297	20.4925656275636	18.7126508277155	17.1479920107282	16.9835614050764	18.3191308472864
2.57x56	6.55x55	19.4096430673003	23.2546330222603	18.0897699819539	19.7669924115936	19.9787885018086	17.1456824011178	18.5653102855837	18.9778500889853	20.6381197302467	18.3968353256749	20.1693219023347	20.0427118424628	19.4071286387245	21.9730231647809	19.4202393651572	20.2592698782557	19.4984958394231	19.0210857734252	20.3679987480361	19.1052099962288	21.1223567103673	21.8816127833393	18.3880428811769	18.0961471589949	21.8690548035346	19.861959067524	16.8364238780093	19.8630028948294	20.5005680165209	18.9699167367704	19.1846800598811	21.028584189146	20.3938301944485	20.6773792826847	21.1900080462467	21.9808785311234	19.550183861028	16.3296897092382	18.666794529324	18.958287000676	20.7721825044938	21.2675421711114	21.3340016874472	20.5390602998287	18.356943590914	17.4452842338553	19.7546327730991
2.57x56	6.58x58	23.5521462716246	26.4254764384675	22.0510679333224	22.9160634490307	23.3489767227602	20.0597767185978	22.2627389824343	23.1422702646045	24.5428041185191	22.181092759375	23.4807603582167	23.5820892628283	23.0626089807723	24.5778256361298	22.6154244045961	23.8494080429683	22.7329514361862	22.7812850822775	23.9877905610333	22.9515077064667	24.4755239780479	25.8361041180748	22.3951408568913	21.8362279251706	25.7081380305926	22.7978024598863	20.4822958918184	23.1441537542421	23.7632160702208	22.9126294868136	23.4195314641433	24.7311410775969	23.9263937316095	23.8520540624911	25.0225127834916	28.2421076408968	23.3773193715618	20.6929698931787	22.9727102449842	23.4006567642876	24.4958951867451	24.233922608608	25.0490469678988	24.1870980896841	22.0907523185608	21.1908140004106	23.5235684792933
2.57x56	6.59x59	24.9786275043286	28.0485557916981	30.8781207167794	24.2238568770541	24.7469085948124	22.3829821516258	16.7823694691781	23.7786353266961	24.9811795758327	23.8616780005095	24.1410687418764	25.4188872101042	24.9578098798753	25.9598648686776	23.4597718019592	26.3522333209161	23.0298803079825	23.8317861269356	24.8612770790239	24.0395195459477	25.0337832937812	26.8187933546608	22.3132379989996	21.7758238879726	26.9723968160043	24.2320930585866	20.6907835037729	25.4431662730879	25.6498114223087	23.480661085242	24.7684789399753	25.6293638040432	25.8065333588221	25.5175199617831	25.416542369095	29.9119168559957	23.7885835013353	22.1967882586648	23.1562790188752	24.3235827130791	24.7273132790443	25.3141701226803	25.8887298452435	26.0262448309394	24.0205061770147	21.4382332061203	24.9740424240851
2.57x56	7.32x31	19.0773000448177	22.6690151087338	19.9858964272309	18.3696318144921	22.347128070515	17.7998863760418	18.5938652517437	19.1600647702454	21.4373428857216	18.9995827848929	21.1679732851305	18.2084717919984	22.9547879319326	22.1674922803641	20.7485273212342	18.7434089482143	22.1492628771253	19.2374789668501	21.9834741794831	20.6242111606723	22.0005384934097	23.2037024847329	20.0242165889205	18.9582890578238	20.7704249836155	22.1196115924308	17.1092745024446	18.2457412565234	21.0510066505144	18.6639630571859	18.7374420346001	20.9927441036183	20.1914670343687	22.4639038014322	22.2489005121601	22.1875562647174	20.357775320501	15.7638615510287	19.2557568275049	19.6370456280979	22.6050211015164	22.2759567695756	21.6467069320024	18.4385429467732	20.425024528749	17.735062390643	19.8602041782052
2.57x56	7.35x34	16.8825213164385	19.7538564589297	17.4868735341684	16.3899117142223	19.0730874270528	14.7479280578663	16.5859389242816	16.3345669364082	19.1574827417383	15.9909595396899	18.8750919732859	15.4812808578619	17.4783673722691	18.8747141700212	18.3258446462912	16.1306564652527	19.0001786570548	16.1435398224801	18.6582243528156	17.4268747915396	19.3416130402818	19.4450930314051	17.1233038284088	15.8547371154491	18.8967404067474	17.1159064615345	14.9157842569541	15.5016761029251	18.2138637581376	15.6455985503911	16.0269763523879	16.5838731603929	17.7767919771819	18.5843438678905	18.7445019672436	19.6743130248555	17.7519656658073	12.376461408658	17.0023517785041	17.5447930452314	18.8910948862156	19.2459471837579	19.0900932161161	15.6783145777855	17.1788095338414	15.0475267735266	16.3769036450728
2.57x56	7.36x35	13.9360693525829	16.8898625808501	15.4326187343561	13.6949634902763	16.2756787876881	14.2935748502605	13.7340532618743	14.1033099661037	16.2884583371171	13.6603170168192	15.9465988223194	12.9585417775304	15.8296451634268	16.0116324277071	15.6374172739618	13.4079015882427	17.4056256135768	14.1877897855868	16.3108488129833	15.6448834127967	16.9962070474562	16.780389536599	15.0628469088682	14.1042399653438	16.5194524122321	15.2309586041063	13.5508390146146	12.9876294218768	15.7322965901358	13.9195786574163	14.2812366761426	13.6598458629664	15.3129899431822	16.2422943268493	16.7238115870755	17.722632902591	15.8669137515775	10.7919165119083	14.1962050562818	14.5854546038168	17.3500540056796	17.1510942508051	16.8006188278885	13.1358269248647	15.8606171695808	13.4553264174453	13.9964120045103
2.57x56	7.39x38	11.7226899216861	15.2061715760411	12.6073988197407	11.0058423575844	13.0395058955468	10.9146005423927	11.7268347818156	11.7491331595144	13.7542518880527	11.2140242999558	13.5372736176824	10.7243271583815	12.4620065800015	14.6946467123235	13.3398562960776	10.928657465581	14.4652904913797	10.9443878312129	13.3395460942267	11.9000912181378	14.453391920238	14.3640396476757	12.1789499547375	10.8074329051815	14.130888082495	11.6375527066476	11.2921357147353	10.4473097494044	13.8388108231885	11.1606548194987	11.4212652539025	12.4685753396288	12.4797913444096	13.5851674262778	13.902765983789	15.0561952033042	13.2277978892936	7.46182323564422	11.9005872964321	12.3611865935273	13.8597880575426	13.8082970709643	13.7770890974835	10.547022992295	12.8950839469931	10.1695837672935	11.3251861353357
2.57x56	7.40x39	10.9772428687717	13.4535677795892	12.9258556776718	10.5223246480994	12.980969378286	12.3425798356746	11.0986433855674	12.1922477419055	13.2329689412467	10.7940478505517	12.6418294957652	9.88507511352342	13.0193599689078	13.9741180043679	12.4582595092573	9.54341542635549	14.3996202727711	11.4614153140003	12.8707257371137	12.2850741145506	13.4584500593493	13.6710981636444	12.2891917960458	11.5034892967308	12.7316454945934	11.7975640706037	12.0684267823109	9.88898963494249	13.6365604900943	11.1200810248847	10.9274237585993	11.8230181002991	11.8939223555562	12.3306551731852	13.1383111928436	14.9025528350011	12.2131605246144	8.93220275184123	11.3702194789723	11.8062162016456	13.6345767077676	13.4196970159538	14.3137060190574	9.57350500078211	13.222125131763	11.0060591948254	10.1876125760651
2.57x56	7.42x41	11.7613537486124	15.6616486360792	12.8179378216623	11.5635328079268	13.0027536314428	11.0008219238382	11.8827844380011	11.9611133679102	13.6770349491401	12.0018853518937	13.4825993042885	11.0430324186792	12.6214524124603	15.6951949971958	13.4191824266607	10.9704560525076	14.4842114386666	10.1446335567136	11.8737486077481	11.0248893418483	13.8504886917394	14.6279215543426	12.6573553714826	11.3298326995592	14.7921252360842	11.3114123344523	12.4190803604776	10.7494195657254	12.5694017359618	12.2797763008941	12.0968660817585	13.7006550938267	12.4498204404722	13.1878934633246	13.5597850646682	14.8585736192947	13.3400395051889	9.23977207511095	12.1597879093346	12.1523774217229	15.7313952019521	13.8139272475281	13.7364409509887	10.9958647681754	12.8631564555516	10.5866148508388	10.8695959446522
2.57x56	7.43x42	8.55397603457012	12.2439685151506	10.2666079110873	8.81220029277592	10.055648213815	9.79658363920811	8.82297308167717	9.52032121306839	10.4972904122921	9.11501689521199	10.2404592670446	8.35635063888537	10.1508086869963	12.3911475255523	10.2087227898499	8.16081944414898	11.060441672917	8.66573101359602	10.174423521753	8.42336625108988	10.4486920234066	11.0613068848125	9.87333302385775	9.39104754540195	11.9024775992228	8.79619326754477	10.2371717285586	7.90508829805208	11.427354024445	9.71492856381353	8.95930443728753	10.5921383110305	9.39901143738	9.87649107730068	10.0247564060181	11.4776599531438	10.1960663983715	7.48390065407071	9.22879201195909	9.15304730677166	10.5345221533774	10.761622043168	10.8113100038802	7.93245245809895	10.23162210991	9.07082857295848	8.1732659934692
2.60x59	2.61x60	3.80911407022683	3.81290204437512	3.83102022965163	3.85634516090041	3.85515058071666	3.80253152518161	3.78832548760003	3.79831936519298	3.79348770921958	3.91881895473624	3.77317505557323	3.80199145185783	3.86043598574047	3.82718917745125	3.80371318582251	3.79068357951438	3.80581213409175	3.81503826979494	3.83666573993618	3.82752465700745	3.79732603288156	3.85253825419034	3.78544713343087	3.79885166859671	3.79168287176024	3.81106494303102	3.83800286607501	3.80756733361342	3.83632454310112	3.80607002037535	3.80662921756244	3.80381939634363	3.81325556447506	3.80349076507358	3.83615667041898	3.7980564766733	3.79917280470368	3.81401678024625	3.82439040894101	3.81110626983819	3.86723712745935	3.87575605527489	3.85162744823536	3.81387886540724	3.80277346156723	3.83492816099598	3.81252645892458
2.60x59	2.64x63	5.92191480857332	5.91033746921443	6.27051305715888	7.11382302281973	12.5100561949178	5.91335488534216	6.61191757359391	5.76329818766997	6.45974496400593	6.99466918445755	6.34713644094721	6.6356209958074	11.0143660280563	6.07625295720973	6.4173051976667	6.37524117190871	6.95281568862572	6.1469821864066	5.8135690414753	5.96230400097144	6.04717744075697	6.46474407846126	5.92426915323739	6.166291348939	6.06388192497183	5.79191729913334	6.01598346074854	6.16377449295478	6.06925918049312	6.14162763443047	6.35764311675325	6.25923661479577	5.99792514124676	6.4743941029258	6.26014864040783	6.26639864675078	5.75143477751421	6.20683832558896	5.67235912121226	6.19977370554765	6.27424521356951	6.15080433764561	6.29545566261887	6.0991328072112	6.27727974523997	6.36489669986874	6.07372850891444
2.60x59	2.65x64	8.56888516669467	8.49669829992804	8.45158139048545	9.44631785406356	15.8576685549926	7.48252430667619	8.87748151223082	8.3118923236529	9.00036560368522	9.20936659059677	8.84210953336363	9.15628074056273	11.1450622699023	8.81688476730869	8.8240447641657	8.73105142580205	NA	8.57336392555454	8.44332967495644	8.34400437439962	8.56443588334924	9.03248326873623	8.51266667971911	8.56624036552792	8.34709542296001	8.64294128176282	8.7064246393109	8.79260058230783	10.3755480819087	8.55677334045959	8.74744179746284	8.72664746623811	8.9004208889243	9.07568653050556	8.81937219987908	8.55829802005048	8.31669315293044	8.68589943529166	8.24433587379844	8.57795097910917	9.17455568406448	8.92579335409464	8.90654253905521	8.75992283071033	8.72125415293007	8.62838484306304	8.39276402623117
2.60x59	3.28x28	8.06246203091835	8.06288620780425	7.23991995812108	7.68423275285178	7.74020710317237	8.21798886589657	7.60631185266552	8.60850590985451	8.57585366013204	7.98365235966597	8.4898548868635	7.63408573438889	6.39303887052159	7.66105273444844	8.59009720550356	7.73037812787964	8.97991681475948	5.47854223311274	9.49094900418288	6.90632384123421	8.28021624113766	7.99782076568361	8.42396397190776	8.05487312128503	8.41460670501005	8.15997610290618	7.60392885290229	7.7269472626646	10.0949949479928	8.04186912353092	7.43905498030496	8.01238859516936	6.97875325541747	8.00813548836432	8.08613183172275	10.6427708328236	6.01767936998974	8.33299951998078	7.77977904570561	7.78660272519408	8.28348145407473	7.91668901751231	8.20728737159849	7.52989196469644	9.29427463549469	7.6806601929782	7.58957054120982
2.60x59	3.29x29	10.2085884430709	11.0013575071443	9.54605892502241	10.5746002761334	10.0305604030882	11.0105364537792	10.1099897626061	11.1950853949401	11.2816384005161	10.6440147500837	11.392850301834	9.97297016941292	9.70020974000047	10.0619466804391	11.5431583199747	10.2012097811975	12.7110297379874	7.2038404341018	12.3842781784002	8.95577478502	10.413927501188	10.5131307420768	10.8641790762119	9.88988543917471	11.2118386092558	11.626142481494	10.7085834730836	10.1790569798975	11.8512428462166	10.5614851701832	9.7962806207254	9.2659193823387	9.52637087247815	10.5578584002628	10.5299301517152	13.800588139641	9.83583428083252	10.1610564903459	9.99272245186466	10.1637275150409	11.3189058216773	10.6799012167716	10.7946657660161	9.83466420372348	11.8734162312285	9.37117009769858	10.1184812101422
2.60x59	3.32x32	10.6018953494175	11.8367881623353	10.1781283151668	10.4435610784828	10.1985390130155	11.7919338956763	10.5495102255982	11.5371138071877	12.4267051948616	10.6518652826629	12.3520255828751	9.90968344600371	9.6813908608216	11.743292298159	12.5062004621708	10.3238074371813	13.919999137931	8.40091185526904	12.3969528917392	10.1415632917218	10.9307194182268	12.0901831665198	11.1615207745181	10.7255337862505	12.1024328959098	11.9202678661178	11.4443567315948	10.495397181622	10.6202460894275	10.5238146600936	9.79537084545552	12.9838754230006	9.27605444140988	12.0687395779344	11.0609839526147	13.0259773529667	11.1109614345474	10.7049177951071	10.1512122428802	10.2202889391641	12.2125458033942	11.7341190125207	12.0190829933069	10.0337674380065	13.2359115288672	10.4353040204874	10.3569157571161
2.60x59	3.33x33	14.2341141276863	15.4017010748813	13.7826049787404	14.1227665136828	13.8632868036408	15.3997572383463	14.1149068009676	15.2230284109306	16.0332380697101	14.3927341738809	15.9636276578978	13.480426514024	13.2877135730719	15.0565508998575	16.1133930008549	13.8297116021991	17.178407085641	11.8415307709772	16.0836730568611	13.4535662558297	14.5011235426777	15.7250024483305	14.8190325257758	14.0817629933187	15.4574887999312	15.4731701664526	14.8908625337823	14.0416978318151	14.4309749497392	14.1309762224696	13.5089763120675	16.0598198620034	12.92623108257	15.5659261529791	14.7177854652118	16.7307753257283	14.2097903221687	14.174294232871	13.7289232644079	13.7653323243574	15.7001596488698	15.3161617580907	15.4722726514239	13.5389448259456	16.8180009216316	13.8301136293235	13.7938238353257
2.60x59	3.36x36	16.0271201405617	17.4218808112098	15.7401480933313	15.5729761766979	15.6181511389793	17.2731790646655	16.3189003918769	17.0102880927984	18.1073722279076	15.1897228743648	18.1408053569846	15.062994688972	15.3532959979283	18.0966035763621	18.4720753571438	15.3210423601007	19.3436458300911	14.3105623229837	17.8598859178887	15.4529797773763	16.2156219430523	17.7052524974935	16.1867325300692	16.3526515892683	18.1166047039725	16.8725121721693	17.2052413816255	15.5674789545385	15.1801569820605	15.7736341405524	14.6612538686157	19.2032726898308	14.3680343471193	18.0679314255949	16.3745947125417	17.2134020170331	17.0449198883421	15.9900865851314	15.4797360119609	15.9148636814771	18.4289687448864	17.0339079485595	17.4851330563997	15.1547768706768	18.9858839141084	16.1112403619337	15.4415616438235
2.60x59	3.37x37	19.0639287136728	20.4366420676196	18.6343576492457	18.7750496404137	18.3518792498207	20.3872702684788	19.1842293824902	20.2248626447746	21.0859605425032	18.5557360942648	21.1040753884173	18.2662643690493	18.1660565340968	20.6620332736156	21.2900399717802	18.5587782464256	21.9300384404588	16.8992917603076	20.4381604358122	18.309942244584	19.5525928203909	20.7646140585372	19.3271548345844	19.4601702973021	20.9653103482872	19.8198954084021	20.3085909161616	18.8272468513057	18.6268336010176	18.8614089081383	17.9137340049472	21.7474596907317	17.4770958972021	20.9667946286503	19.6501921364652	20.6267522649592	19.4112687375143	19.1842634208353	18.6117877432556	18.8629214068235	21.2958214211145	20.087934537926	20.3096994315524	18.2985424009674	21.6481659962224	19.119027747247	18.6617659132248
2.60x59	4.57x57	18.4803383627032	18.6525729592461	17.3019613339066	18.7959700467946	16.7372411705155	18.6693293934196	18.5779182095304	18.2564417672229	19.357071963497	18.2888519049174	19.5326760583388	18.7799543396676	15.4798579127846	17.854501953289	19.0612163830119	19.2311556595021	18.967595630443	14.4996826861832	18.676341531467	16.2934307621201	18.6039820737389	19.0842293268552	18.6324531127815	18.9652721836519	19.6263108606788	18.6975479140983	18.6359488355168	18.9722975677697	18.7427582281798	18.8424356440456	17.0439318527152	19.6468417054752	17.1284823028779	19.4215002767551	18.3406174923311	20.1991634975313	17.0604880938384	17.9626153162617	19.1863470467935	18.7383874172779	19.5442767581714	19.6633695484777	20.8567797610273	18.5113586211277	19.561471621532	18.4838617177255	18.8854594860702
2.60x59	4.60x61	17.7774899521839	16.4920771584419	16.4687746660157	17.4453189710019	18.1089976254899	16.6959330976139	18.0081960784527	16.8389473542737	16.8204283239161	21.1057045132353	17.2484928906847	16.6716093104415	17.5200508275518	15.4166294954507	16.7165974109566	17.1956304624169	17.2163697102496	16.0664964755855	19.7220613020039	17.0595389445319	17.4758687909929	17.0559164514839	17.3412658707489	17.1819958677681	17.5422085553673	18.3669559263368	16.0642863831544	17.1237913150097	20.0659709458576	17.9764218074677	16.8275508913211	19.2026571859209	16.7259825122472	18.3079650425709	16.9350079421298	19.5781028192213	16.521718675731	15.9117170035166	19.4190729438869	22.3527333004266	17.8734292176963	19.9261868153443	20.4325926157206	16.8630665360723	17.8621070705558	16.7208462405466	17.077397049902
2.60x59	5.39x40	22.5962303272028	22.8073620350974	20.4845778086833	22.8750099890688	21.6725722746517	21.5166532945995	22.4917956152905	22.2850746689348	23.7398601512309	23.5792044183005	23.9858153916018	22.0243302054796	21.556795425109	24.8737523506205	25.2498557817664	22.440788176889	30.465596662465	17.9175435258297	23.4606454088544	20.045906664454	23.4858653236367	23.1144476680711	21.0109298461539	22.602886939504	26.7449607589916	23.6758428149876	22.5291877794118	21.8260927561485	22.8479454218536	20.907696692845	20.4481297188765	24.9230425309592	19.2351468671284	24.5344994854185	23.978777658588	23.4339079754103	24.0842202697119	20.3688502621036	21.6202041849748	22.2216530888231	24.8115296989122	24.2753917579099	24.5851147241578	22.7212600882962	24.8130747993875	21.958655901489	21.4623540414373
2.60x59	5.42x43	22.7872575357369	22.0277115016517	21.0443306617245	23.5338252521769	22.3198122975978	21.758285341451	22.6077399578109	22.7523337044796	23.724908134701	22.7401610592361	24.1736374176498	23.3590194571604	21.8196939941879	24.4425920270335	24.4835879315104	23.6463417889533	27.7165966886268	19.055643022475	23.8955348548636	21.4409815773439	22.0299236948293	22.8011314850821	22.1210110754459	22.0591256626368	23.0800984616617	23.7692162681061	22.5197364327383	22.8929328833158	23.2990217176602	21.3562394161519	22.251484692038	24.4084341570696	18.5387125766597	23.9450611609158	22.9167351514128	23.2857431489742	24.0322615456806	20.3443129645609	21.3892241561025	21.6940082511278	25.4133541666581	24.3160246339734	24.7361937856251	23.425172656781	25.2217397893167	21.706737870993	22.4957621342332
2.60x59	5.43x44	22.5326426989823	24.6032742739661	22.1684933858844	23.4732842610488	23.5314965312451	23.0413355949693	22.6781618743672	24.4311038637226	25.8316494440444	23.0096232259461	25.9792283565159	22.8679640764105	22.7747753007576	25.7540532926373	25.6545457180594	22.9498754027119	29.2211221892658	20.6319249950168	24.7691329279004	23.0185360742164	24.7807475674161	24.0178312093328	22.6628240737998	23.0940224733588	25.0389472821842	24.7418099782534	23.7594318745209	22.7569756558291	24.1931937742829	22.3290976306702	22.0371849835681	26.463170671709	20.7462273678855	25.8360479369427	25.6378119581215	23.157748271367	25.822758373187	22.4473848365461	22.0572843523404	22.1461318292834	26.0568106452037	25.9375455083938	25.9480899875116	23.368076728734	25.5902092410359	22.5851202786259	22.3972464602236
2.60x59	5.46x461	22.5468486711558	23.0880413201293	21.3616191333897	23.3266096550699	26.2367587556085	22.4222063588756	22.189077853755	23.3871674428521	24.5846850295057	22.2335193345543	24.7550155322108	23.1539548457709	25.3022597607407	25.2311346950548	24.3204380511536	23.0824756904453	25.593605256001	21.8635877202256	27.7849689220629	24.2428491931126	23.348324779307	23.343263546471	22.8339066083752	21.7292122958933	23.7073579717353	26.891946266494	23.3264497513016	23.00705031072	26.6227772029892	22.029280265138	21.6972922965056	24.7262731926993	20.2073560121061	24.5090220531134	23.8338933873591	22.4159475820229	24.9124557199807	21.5001055811361	21.2560746140956	21.6036798948698	25.6568262456602	25.4132224442317	25.8406821504387	23.3780344982208	25.3314103831587	21.9062939357619	22.7185580748427
2.60x59	5.47x47	23.0020369532787	25.8253995322434	23.2166235917284	23.9522663228347	24.1273870321674	23.770134496885	22.9126517452695	25.0978505254932	26.3700785929811	23.4715156093508	26.2942742436448	23.3340356346689	23.1879142227152	27.429408415057	25.8005622419357	23.2253309341331	27.1959912119415	21.4073507235248	25.7172060885315	23.7532888459683	26.2345490146105	24.9886659307775	24.0593307679162	23.4137455568305	25.6846342781049	24.6424467332284	24.0119448816625	23.1376806313857	24.4560079530573	22.9773521538057	22.3402279979413	26.6602209480717	21.4723503138338	26.0452505843196	26.8103162793728	23.5533832177036	26.0204778395786	22.952725045188	22.6371366563883	22.471505712791	26.181939748613	26.1741727854005	26.4619759088395	23.5306851578954	26.3088163739838	23.0035773957009	23.0133852572802
2.60x59	6.48x48	19.389183041067	21.4457388541407	19.4457282455556	19.917409570524	20.3214430589956	19.728708143211	19.7788900093003	19.7349803394886	21.3857665282309	20.2673864373283	21.2803277700321	19.2107247650889	19.868026248221	22.0445749562109	20.6071780212624	19.157269612343	21.9723670094963	17.4163373015109	20.9738933438692	19.4914090306473	20.7133527223383	21.1020623873592	20.12829684797	18.9275945117175	21.0801576132628	20.2543835749203	18.7852031663222	19.1598341328937	20.2563339476816	19.2938186474321	19.4922038004942	21.2694057039683	18.9361843041305	20.9924558830071	20.5540788652764	18.4822703150885	20.8470003117955	18.5926322235449	19.1824902710779	19.4701723156217	20.8373376658344	21.451983288265	21.858685916587	19.1996809869331	20.0041158514942	18.3831564754261	19.28127653969
2.60x59	6.51x51	19.0641175248161	20.9587693818125	18.4698566859627	19.6093027413011	20.2774112253019	17.8400612106573	19.0997769096919	18.3821694312723	20.5948722258721	19.292415426794	20.3008226680595	18.7060511332563	19.5430332087934	20.8569581914526	19.7252921397885	18.8208260711373	21.2369239297974	16.8813695238271	21.7787069864122	18.5876566839395	20.4115140055803	19.9855619385595	18.9485284652925	16.9960263002856	20.1706968149343	19.0531027132066	17.238552868498	18.5114574520755	19.4350916900333	18.5141098084677	18.5965003696932	20.2296044696875	18.5246585393631	20.5898315437499	20.5256088338446	17.4948125740175	19.6962134685832	16.4478667917758	18.3598608382526	18.9505192277151	20.5020739194843	21.0318975368368	21.5847156571496	18.7649851851793	18.954003956948	16.392243287604	18.6574276361989
2.60x59	6.52x52	21.0969903540766	23.7389076833792	20.3863349820413	21.8988138948209	22.5042185378653	20.0781622665024	21.1447898310671	20.8291289784283	22.6498050101982	21.5157167902908	22.4889431943789	21.293078358941	21.1412108451716	23.2947752725799	22.0061061071694	21.3683208044058	22.8595071469181	18.8699555113413	23.2973044363506	20.8364402429974	22.6036082517814	22.4789931714034	21.1142138143953	19.6866625663163	22.7874400931741	21.9277442068262	19.7879284918862	21.1650410819351	21.7245566813226	20.6803015451903	20.7599414498211	23.3468407712907	20.5592928380331	23.0547708945459	22.6046535253253	20.3717734623179	21.8664714345959	19.2514166231994	20.4209564908209	20.6692240057531	22.5939595688759	23.7363547327723	23.8900497697263	21.5527365547858	20.1571736858122	19.095996674696	21.2779238178916
2.60x59	6.55x55	21.664685688927	23.2953095064221	18.8859482420132	22.2788403199089	22.2612292113441	18.6614981713688	20.6489454694423	19.9903292869327	22.2223142584205	21.0523726691316	21.5703922541988	21.9880233308954	21.5035692153652	21.7604303955597	20.8494969723492	22.201089365164	22.2029997072468	19.492209982452	23.8720719251597	20.8746663206864	22.4649178498387	22.3993064847999	20.2107806380654	19.0133536494749	23.2914800946612	22.0868624752363	18.2885816289837	21.8207944401665	21.9859960884196	20.6284402948938	20.9764969668436	22.732044892618	21.2476970516807	22.3409590214923	22.7275789735731	20.4605005559493	21.5000352092735	18.8083810308065	20.0044144628129	20.4704110608458	22.605056093715	23.7173336191065	24.2013279387723	22.4547127792809	20.0567567418065	18.3534470604298	21.6643066124905
2.60x59	6.58x58	24.8366959557828	25.5687334649176	21.799776650232	24.3347810962006	24.894980859603	20.3566588859764	23.2483198532711	23.199722886276	25.1172745535816	23.7194124927242	23.8076406432893	24.5668355308534	24.2147386110195	23.4080071983926	23.1050278943783	24.8845034710359	24.6046111328751	22.4022568952327	26.9886624529635	23.8004997636604	24.8556384951182	25.5996604079039	23.2925009606096	21.71118672482	26.2494821663209	23.8795797492334	21.0597489538693	24.1809404903945	24.6216903765765	23.7299920353969	24.4329436212668	25.4038042229899	23.7689591484356	24.5830990113126	25.7435002476353	26.1447081834929	24.4902233146209	22.0638293593836	23.4700728162483	24.0177835780074	25.3396777011863	25.8275401267717	27.3277819443877	25.211977907336	22.8823402867801	21.0543419512461	24.5715701370507
2.60x59	6.59x59	26.7085190529164	27.7351764732082	30.3695934447598	26.0766922173806	26.7012595021284	22.8665918098872	20.8115899921174	24.0810328059243	25.8878223495141	25.4810107334854	24.6712574061396	26.7782470113337	26.295073359852	25.2530688036128	24.409614663079	27.6963062158115	25.3716073397016	23.6631407044796	28.0858162957746	25.0930328776734	25.843269936291	27.0113147773299	23.705476687888	22.1348883213808	27.9727748176687	25.5264489108846	21.9933517454707	26.7617552114954	27.0622009637058	24.708612283979	26.0392500084008	26.7380494613949	26.0365380571227	26.6844270127728	26.4703803712754	28.6228416828239	25.3716993912509	24.0104239029635	24.2146087310945	25.3012127970182	25.8916827765211	27.4635117018928	28.6894198791122	27.4640810514388	24.9189452023957	21.7868959239264	26.3728110371269
2.60x59	7.35x34	17.3057363322108	18.7731448883771	16.7762964625688	17.0919954657143	19.5226672870282	14.7870338134462	17.1115063334588	16.1110098379959	19.1594230602072	16.7275963007241	18.9659580564758	15.708052616413	17.7846122532936	17.4322215164907	18.1967793578974	16.3869731494257	20.3615990776756	15.77186640826	21.0299963147881	18.3090598884814	19.2923032839524	18.6461157885496	17.0338354166054	14.9519709068738	18.7575796679636	17.9638730233767	14.3463409620711	15.8661992298093	17.5879520126705	16.040378736177	16.4796128898709	16.5488601118023	17.0946974527191	18.8070970380865	19.1288921006942	15.0181930004911	18.1473677981133	13.791927131478	16.7737820422229	17.4734109434878	19.4484315820068	19.6905687322637	20.1778338034587	16.0483495724638	17.7359225302774	14.1410676046754	16.669853568643
2.60x59	7.36x35	13.7542252780736	15.3409163350825	14.2750901223075	13.8383587899722	16.3331342368818	14.0772176583301	13.8158393157998	13.6454523193627	15.932008975644	13.653069691465	15.6888626101448	12.6906612514873	15.6028175981135	14.2549093648469	15.0248910145798	13.1421601725135	18.1802344044294	13.7452805355147	18.0259507932314	16.3401531816565	16.3275647602452	15.4456548582441	14.3511367494007	12.6201056255485	15.68540305507	15.6450300095589	12.4391906891084	12.9001853475057	14.2790007003291	13.374866728308	13.7524072438246	13.2648918201394	14.1941382619728	15.7346571935966	16.3346891308038	12.3063932571652	15.670048468336	11.5946315594761	13.3986595598216	14.119106593549	17.1880612344732	16.9937831573785	17.3934157944896	12.9744048418415	15.9135792956833	12.0689349157248	13.6603697607349
2.60x59	7.39x38	13.6357556812961	15.5886397097373	13.4575925781694	13.4175595769126	14.6530600217156	12.7840440393484	13.8777995734194	13.0330491827507	15.1880039504867	13.4922720844193	15.015550106473	12.532236871365	13.9428493859756	14.8468828378215	14.6774350279604	12.7179184224463	16.6742785451125	12.0551818318929	16.0946101847793	13.9759018313667	15.4343174452258	14.8991438009035	13.5530042794946	11.391662082418	15.0930032465378	13.8295014009906	12.3253492445448	12.4426724219518	14.0656283898019	12.8587132326683	13.2447896925546	14.2751245528717	13.3001149619092	14.9207205590079	15.2351621258193	11.685043003772	14.700069591672	10.8959469069925	13.4374024275527	14.3211657695873	15.2647060240281	15.3130482269207	15.7328309594936	12.4970250059764	14.7463306283292	10.8781458438467	13.0929725425512
2.60x59	7.40x39	12.3730248928869	13.4952716163848	13.5029467154396	12.6301684470161	14.2406551815568	14.058014795838	12.9832385020071	13.5061375677875	14.4608090368416	12.6009603602265	14.0469548657351	11.5947646806651	14.2981018670312	14.208886726271	13.6383721535966	11.2073824330215	16.1805371975099	12.947965206935	15.1456198288482	14.5044517648893	13.9302254468476	13.9393499848451	13.2793647438422	11.9394373820545	13.2865568903309	13.833430304881	12.7767275152912	11.8671711035107	13.2721043922959	12.3849372222874	12.5248181623527	13.2499229809082	12.6280252217043	13.2637182192626	13.9735739880676	11.0348095135349	13.1920709898029	12.0940736313287	12.4598589478373	13.2000050757566	14.868509911891	14.4165875990125	15.6955159838726	11.4024335121938	14.7632822231372	11.6606523831216	11.702982226766
2.60x59	7.42x41	15.1895118420573	17.3792013050082	15.4047312537415	15.501553599559	16.0042215055903	14.5876008308426	15.5904964962634	15.0712416873992	16.734949656333	15.7901536724631	16.6309114001608	14.6636499208076	15.8536002851087	17.474363107135	16.4481500479537	14.5468438844995	17.8791607465228	13.4029055058968	15.5844741650144	14.8686095516696	16.2286258814479	16.6886729849919	15.7640383785374	13.8953900988781	14.0552962259783	15.2473870876291	15.0989024104403	14.5875321079338	14.3778585679509	15.3511532465805	15.5239669221498	16.8358766923496	15.1278519625226	16.0596702954949	16.3717075468627	13.6016872482792	16.0862085340207	14.4180150159445	15.1211694653555	15.5719472770749	17.9296450048516	16.6219589098277	16.835220046082	14.6798895772414	16.2983322152912	13.4225811601197	14.5322430821948
2.60x59	7.43x42	11.9736578371022	14.5884327808027	12.982154636269	12.6604572192319	12.8077700244812	13.2838204594913	12.5857955251148	12.6530613291804	13.7353334506302	12.8094789121182	13.6335346113911	12.0992074947081	13.0238918146612	14.7294517549025	13.3859244731173	12.066996436562	14.3584055521496	11.9450762241185	13.2248948956126	12.2261640754572	12.6804379261917	13.3925960515503	13.0479275749063	12.0918979899766	10.4143190847986	12.5686081966143	12.8994417708674	11.880172178887	12.5152742279185	12.7598326399683	12.4880466847302	14.0142328366557	12.2708302082622	12.6252498589137	12.7692395231666	10.406433298686	12.998680125305	12.6150563217134	12.3141345615516	12.5454491350449	13.3500154307027	13.3205587345276	13.5974498344359	11.8712820706106	13.5191058136254	11.8925853370913	11.8977839953497
2.61x60	2.64x63	5.0790645792311	4.93591136468231	5.31329521107194	5.41669216404255	11.454726448065	5.45698414877669	5.09473964006013	5.27839672627967	4.91357344506012	5.06779567464988	5.05380539791551	5.0080320486195	9.83054591566511	4.70877956587479	4.98254152014813	4.92766252902936	5.55241587059183	5.18906744993743	4.9581537894664	5.10700088114345	4.85364007730281	4.85331010754516	5.02955872815896	5.12450983021791	4.76125981227658	4.59945366320827	5.32115560757248	4.8637217231252	5.17353235227151	4.95693584788022	5.23121802260238	5.28531370875939	4.80241543392489	4.85616813959323	4.97328171331567	4.99459597965641	4.93771586869881	4.91727749877918	5.34279365126523	4.99271839782698	4.69393289257525	4.95092001551227	4.69608070629115	5.00458359906197	5.09605622025503	5.09116489617062	5.14939802307027
2.61x60	2.65x64	6.43729454041059	6.03963624732483	6.2218852448434	6.98876162134609	14.251632397729	4.82852793302472	6.19599144608835	6.16650208789391	6.37207548605633	5.98016462984089	6.4220981773872	6.61618062026726	9.04516605707159	6.10918914423183	6.31133504101945	6.21485904908551	NA	6.10981456347081	6.0167768780303	5.92511890176054	6.16328767785506	6.27676644459549	6.28431046336828	6.01104117437237	5.75180397788381	6.23165997146828	6.40718487324972	6.18761682717991	9.92426672354184	6.22889869880704	6.43991925415218	6.41076485296411	6.58204026119561	6.59738539119856	6.24213857584081	5.7379478910147	5.91625396682732	6.09576254458784	6.26666290780029	6.0912048069327	6.65988190585987	6.53011102508985	6.31979699041037	6.26608522125258	6.17810440183718	5.96662609855855	5.95662941603723
2.61x60	3.28x28	8.94253733567828	8.69234318236458	9.01721913895853	9.0925052103367	6.27469250242592	8.81695848918435	8.75928661478776	9.77572738981607	8.96895696276886	8.76576585359203	8.44497140314874	9.06651057463675	5.76186167831197	8.45026756972819	8.51085577365755	8.93010895790192	7.18954310092095	7.57640640409422	7.7762374577941	8.37450858259755	9.13836013735506	8.26656676014899	9.06661838835186	9.17920546670571	8.76252275318016	10.10808023316	7.33177918379979	9.06080851800765	7.35826263461695	9.02775819348303	8.87822082401649	7.89975170495883	9.23196680020027	8.70398632811427	9.09857868021154	8.12801193404635	6.12444617904346	10.48700591208	8.97911821951354	9.02033220009108	8.47946495953607	8.95929405701141	9.27504587589733	8.78114963999589	9.97970565698207	9.29311621578037	8.78831092986587
2.61x60	3.29x29	9.64946008852309	10.5047254604773	9.95729928243598	10.7981693355865	7.51074017657381	10.3827796374574	9.90608595763231	11.3166004170864	10.4817118830848	10.0316141273476	10.2810369126854	10.0122619322509	7.91455778928931	9.43937529712639	10.377163485269	10.0336514290661	10.5273766437798	7.3733239451417	10.2411607740529	9.00036227048668	9.8707862402141	9.39575015632069	10.243696256723	9.54285837681772	10.3617565113257	12.9016219522973	9.14295805524667	10.1502081752051	8.64778046668624	10.2232714920421	9.80705236041901	7.4523140030463	10.5375340568845	9.90402281903672	10.1996275912408	11.2681176777668	9.34930746098341	11.0355190634605	9.78186107036897	10.006876935388	10.3526078840068	10.4361570034185	10.5832902728783	9.61586959146181	11.4187727449144	9.47785824962581	9.93966669461305
2.61x60	3.32x32	9.65624994498382	10.754740071243	9.77398363002517	10.076296442642	8.55279018800298	10.8979571021362	9.92466795414335	10.8662271741392	11.3132411359433	9.68039348373815	10.8103775142222	9.82868704354758	8.50939322161105	10.5774749822441	10.9963951365891	10.0474194696947	12.429766771746	8.58411329142387	11.4336533531501	10.2962176064806	10.1747572944027	10.4991069143999	9.9603442711585	9.94406843299059	11.3439155938327	12.4366753595967	10.1522696477192	10.3879635636635	8.74617773658871	10.1228994858193	9.45911052900853	11.0558540601801	9.65619252086453	11.0647153149098	10.3507961046482	12.3632853643358	10.1732436321952	11.4887806576677	9.33902425310053	9.84554340806032	10.8738815516815	11.174548134041	11.723414604969	9.74557053229825	12.8220744811438	9.99815192923172	9.99039548766714
2.61x60	3.33x33	12.916696675234	14.2460939909857	13.1707963312778	13.5523598683034	12.1544216234258	14.3156197560567	13.2149585697421	14.4663507492387	14.7796605509058	13.1477917917801	14.3210813139232	12.9407863748692	12.0170306648523	13.7493584577609	14.4865903510799	13.0577862212551	15.6616156893215	11.6939602359509	14.8768960136179	13.4596948702413	13.3604658975651	14.0224662951993	13.391994735662	12.8824113037894	14.4387734589888	16.1466012213097	13.2113156422818	13.4851759721555	12.3071141215153	13.3598011212742	12.9092916536888	14.0134370516301	13.0122044250773	14.5555562243426	13.7664677023556	15.8014241763203	13.4275298175055	14.4532666549815	12.4793245810821	12.9010793734478	14.2239585910533	14.6464287114641	15.0211010581781	12.7179735414098	16.2886068465047	12.9876798928831	12.9170419988479
2.61x60	3.36x36	14.4941031457624	15.6852007000229	14.4983039697752	14.6705715294258	14.3444614050162	15.9202946266707	15.0169384363125	15.6684003969774	16.5856849722886	13.7683036355246	16.2058957481529	14.4209510782056	14.296229852657	16.5012581944529	16.6123756880225	14.4967708473301	18.0568260223108	13.8803674663173	17.3685058942904	15.2493339198799	14.8217324898272	15.7505301815526	14.3052024802168	14.7385493180299	16.8640618179607	16.7365318689387	15.4613443464661	14.8436347974477	14.2309377062792	14.7866333220243	13.6681634099099	17.2159825743406	13.7652403175535	16.8698023699153	15.0607505125077	17.468082493508	15.7901160857037	15.8483036631685	13.9663677812093	14.7776297490497	16.7569709076551	15.8012559310961	16.568924105083	14.2397497871276	18.1533547863749	14.7292360290682	14.355885413307
2.61x60	3.37x37	17.7099808582618	19.0384072075371	17.7408580683123	18.0652076932428	17.2787669120224	19.2857320576638	18.1955025487069	19.1812589002912	19.8735336817588	17.1871752769325	19.4612810472487	17.5109845811136	17.417400265252	19.4595362226339	19.7286554534261	17.7089547404696	20.8618585940946	16.8777729869791	19.969583520945	18.3929203227764	18.2760518985912	19.1094422210592	17.6696382532297	18.1115434461009	19.9683433714467	20.0933452167627	18.7471756006072	18.1846974404305	17.3370457114238	18.042511937089	17.0652507160018	20.0545143296964	17.1590547816597	20.088880531279	18.5209086440164	20.5475804901696	18.582823843539	19.3048452726252	17.2668575311201	17.9034203156827	19.8652451532822	19.1078085347326	19.6361821391023	17.3709770018845	21.1400871568686	18.0800603981292	17.650051699641
2.61x60	3.40x40	20.7549148396229	21.5069791928109	20.5271898953559	20.8971208782454	20.6374927983028	21.7708652331505	21.142946743536	21.4534477881761	22.79353123147	19.4432656207747	22.2923530162251	20.42044654262	20.2209356361173	22.3713860545117	22.5524135737176	20.3409909788093	24.0675676377984	20.1260254645571	23.5179382812355	21.8247610296196	21.0006558230928	21.5726975132921	20.5845559825807	20.518511373879	22.4420939531052	22.6307431826708	21.3812786334213	20.723271411628	21.2778368496424	20.6695026306876	20.076699878217	23.1088402781273	19.9959147327648	22.8947858255979	21.224926218953	23.0903173646444	22.0680542866833	21.3609864940737	20.4616701419997	20.8098393554588	22.3606912683843	22.2433237849023	23.3114289780785	20.1629365668793	24.1136667887735	20.5135546895218	20.5267106473492
2.61x60	4.57x57	17.765358876195	18.2987957527265	17.5784977173819	18.900011375658	15.5272032897106	18.2126948582575	18.3726438217258	18.4379502656884	18.8975072959372	17.6247729630767	18.7256030610499	18.586442747336	15.0227130372646	17.2739644841594	18.2232756111518	18.862097603395	17.85752183255	15.089101530575	17.5744275866954	16.9768848438104	17.7774368231194	17.9420017277895	17.9695165488669	18.359172775482	18.8872285155869	20.2842775074687	17.3877799905566	18.8902510835616	16.3312791905594	18.76638329567	17.2621884186218	18.260560916905	18.1777804475684	19.0509448847032	17.7161621690478	18.5335893177765	17.227151534714	18.6882338651891	18.3103658892989	18.2629773038243	18.5542477346833	19.4150400205614	20.792872432639	18.1552066911947	19.6198368494746	18.2827571771875	18.5064898346499
2.61x60	4.60x61	17.2613740762432	15.9742295901868	17.1732033994826	17.7083575184149	16.8125286914253	16.1582629016859	18.0605252415316	17.8013557348872	16.8265186536015	20.9304579261898	17.0043024261509	16.6259171777078	16.8953823573188	14.770162355235	16.2415881304754	16.8941495494742	15.4453466778833	17.3946040483824	18.0271910734867	18.196254339836	16.1671676245408	15.8289567881146	17.0455644670395	16.4282636331415	16.4745371406908	20.638164307903	14.6975312552823	17.1426469951405	17.0415705848962	17.8010891239834	17.0861186639915	17.3341797902295	18.0142147483591	17.4547253773871	15.8812298642139	16.9800924909142	17.6924800409666	16.515826409841	19.2297992189206	22.3540749081683	16.7214012271699	19.5226677992533	20.0864883192658	16.5671309827622	17.5593610646857	16.3669407342973	16.9789275868648
2.61x60	5.38x39	21.7035964070474	21.1155855471734	20.6614383332816	23.7870984148971	20.4375486543763	21.1966694317763	22.2454725506113	21.8702878353258	21.8024514906008	23.8260314152399	22.3356958700641	22.8670082433186	20.5780824179514	25.9139971636951	23.2875087761658	23.2714611487977	29.1030514894916	18.8515526416261	22.650987042511	20.849079356173	20.6504826577976	21.8799441041334	20.9011468824082	22.2132984718614	22.4853868323407	26.0335960251364	21.7930439590251	22.6892106737982	21.196211312402	20.0706157852718	20.7370433041936	22.562163504416	18.2981374735245	22.6511722213222	21.0233666190741	23.6212966621225	23.9810959299195	19.6480832144003	21.0819246986607	22.1299476953742	24.6954856805854	23.6553709334688	24.760136065862	23.0729008796033	26.2452838049048	22.0502286609459	21.7621016678077
2.61x60	5.39x40	20.0584826195802	20.2873734376829	19.0298486594087	20.8675389061576	18.7019731846669	19.2918783170535	20.4727550661849	20.1262931261571	21.1622697506671	21.334713051738	21.1007413613835	19.6746529829626	18.843406512624	22.6059188045963	22.2925837668046	19.9921882244041	28.0202406485026	16.4164966725547	21.0490205710385	18.6902409561782	20.7265803498792	20.2787791545744	18.8504419311591	20.1879457597845	24.1960749089599	23.8471066798469	19.6685257708858	19.4856801266982	19.6412312750499	18.7813674688506	18.6204548548095	21.8555974294916	18.141689805528	22.1691876937338	21.3907109746263	21.576048618781	22.8419324051184	18.5767035019672	19.1876727353788	20.0006906130763	22.6831799578454	22.1782603465646	22.7680487086619	20.1088606340588	23.580770025595	19.822008601552	18.7222874937867
2.61x60	5.42x43	20.7722042643529	19.7471222713589	19.8267967407748	21.9492738148669	19.9232076483683	19.8060153741231	21.1067280742421	20.8469597543623	21.5967298682	20.7893680760142	21.5779437852637	21.3937684618676	19.6114583343514	22.3720623993408	21.9479513394759	21.5969084361628	25.535669288272	18.0515917857678	22.1612435120415	20.626435610643	19.6092526374668	20.2685451377251	20.1349814253701	19.840890831815	20.976351303313	24.0255322105463	19.9566089554313	20.9445921659984	20.6110582697735	19.6933752058909	20.8235383400612	21.6555926725638	17.8550141416914	22.0776310776315	20.6628360589731	22.0451966877141	22.9522521988584	18.9842924018779	19.3660894348859	20.005113871208	23.5195558844124	22.5245482751597	23.2343240271801	21.2121910702313	24.3318704172121	19.7759670560001	20.1097618086341
2.61x60	5.43x44	20.0682511694467	21.9784520155538	20.3260003689855	21.3759276289943	20.8399626919052	20.5811504051644	20.6621265604487	22.0668885436982	23.3300333904605	20.530984900876	23.0605904087471	20.5040121439683	20.178323666747	23.2772569689815	22.7972352271059	20.5413704265319	26.7804867020747	19.0168024126034	22.9315944931878	21.6704447116343	22.0714078617564	21.1187621559598	20.134995927489	20.4067730423014	22.5946614491123	24.4097748658196	20.8064945870274	20.3959895567732	21.6720779575933	20.1423902752379	20.0762681791213	23.4395813529167	19.4299479669916	23.6013065951866	23.0682848083684	22.2588178931407	24.2364697099227	20.5736786696011	19.512335867343	19.9759460351694	23.665472697582	23.6917749018515	23.9885328855268	20.7886699430243	24.2573795987943	20.1169269521962	19.6275387402496
2.61x60	5.46x461	20.7134574854127	20.8760433511717	19.9590202164335	21.9340706664313	24.1461861584806	20.5410600018597	20.8040585944185	21.5900114173198	22.6816388076347	20.2918641331939	22.4065316370026	21.425090291525	23.3397696860959	23.2136386850489	22.072077315015	21.2912268786935	23.5157012653248	21.1396325653972	26.4776211544768	23.7100380429893	21.0478822450146	20.9750972822536	20.7363801325111	19.4851673074675	21.8396438844593	26.998923052596	20.9958962180708	21.3481967622561	24.3800417144844	20.5213954203899	20.3631421200167	22.1916203554405	19.5727949205013	22.9314147404821	21.6234700730479	22.1606176132345	23.8317621673262	20.384023351635	19.3021996155879	20.0736685735318	23.7891157044561	23.8047181457794	24.5691960796441	21.4405226848601	24.5788531465567	19.9444353642814	20.6344139000845
2.61x60	5.47x47	20.7305101239695	23.3238071291974	21.2765721628274	22.0748328645995	22.1112614972552	21.4109163278922	21.0183337588877	22.8635205731751	24.0960299219602	21.0503896638518	23.6313741877192	21.1953309009319	21.2369692282115	25.0710855967587	23.2662483868801	21.0399890446739	24.876341571863	20.1903253069385	24.5930015451551	22.7691147390495	23.6480423079797	22.2823042345265	21.4938168550865	20.7391037655922	23.5090060402391	24.3733802538753	21.2941697889352	21.0605022732128	22.5488229626293	20.9449340175614	20.4674225294735	23.8612204842921	20.1777561190535	24.0674329748729	24.2914415587054	23.545496681956	24.4247997125872	21.295839288462	20.2051279134778	20.4583577542285	23.8757142301545	24.1055862405377	24.7597215048958	21.2314125766516	25.0890106819699	20.5294855999852	20.5689644610515
2.61x60	6.48x48	16.4111980367065	18.3568483406057	16.508017294636	17.2477415912925	17.9107265625937	16.7934005192516	16.9655429621336	17.005117670866	18.8041296262284	17.1787313559529	18.4258554753911	16.4846498597938	17.3896415431716	19.0590786241098	17.7014175703529	16.4216245542273	19.7679192127042	15.0108405494163	19.6962738100383	17.4414300159133	17.8465903186015	18.0254393011655	16.8725281448869	15.7719443950326	18.4809528434007	18.7912514218718	15.7894386220663	16.4851608727364	19.2725945061894	16.4524056903542	16.6132477559326	18.2232293790096	16.29408058161	18.4622952527577	17.6639481430398	19.1192485469487	18.2164680989483	16.3022658854529	16.1447835228596	16.7481602870285	17.9536210832244	18.6635044404849	19.4502348057806	16.4125155293148	17.8813358840999	15.3346754774922	16.421864236438
2.61x60	6.51x51	15.5891147599856	17.4042087438642	15.2577970231616	16.3780377945589	17.1127131104334	14.4721841475294	15.844750865823	15.1383093177541	17.3667471047401	15.7739094393242	16.8829147068864	15.3827476739365	16.3322282925509	17.3838622866151	16.2723523191947	15.4643177023754	18.2871156282231	13.8265087422675	19.6380477135585	15.8495797420626	17.0085589336663	16.4039356558114	15.4484343866943	13.4520042372875	16.9944353539622	17.5628763874258	13.647405650892	15.206486247651	17.7556382875976	15.1618575049365	15.2123618810492	16.7193376364017	15.6069242966063	17.5023342728906	17.1376360096718	17.3577433441101	16.7100558048141	13.5223265010131	14.8414773523393	15.6600908043344	17.0577254052233	17.8710318952208	18.6531682027478	15.3626589169974	16.2240993586701	12.9523319135976	15.1587857693154
2.61x60	6.52x52	17.8876071625022	20.3240179098524	17.5869272472482	18.9755709795516	19.4737428862558	16.9434608625275	18.2295344153382	17.8701884153469	19.6454615115044	18.2758582014635	19.229237218361	18.2266624756152	18.1427328150971	19.9896562751839	18.7328747927274	18.258389359415	20.082521579722	16.2544106629555	21.1821379940742	18.4861891421677	19.3970465019807	19.0405435058982	17.8826706338846	16.3920694544649	19.8202695491257	20.8426951712105	16.2991956243245	18.1093665543552	19.7270248390374	17.6314562359438	17.6840017247228	19.9417821169523	18.0888227919895	20.1849580876454	19.5046078914702	19.8484065607293	19.2609844763968	16.6064244797006	17.1846344738548	17.699670335913	19.3734439375141	20.8589405531537	21.3048778921636	18.3626993930631	17.8706540730887	15.9750592174176	17.9591947480949
2.61x60	6.55x55	18.4018609928453	19.8087496576639	16.116818823825	19.2137950962323	18.8113066000212	15.545326114302	17.6529010930215	16.8924512430849	18.8724879652896	17.7485850985367	18.0527708122604	18.8153246317995	18.1621207186826	18.3285272185192	17.3710653098766	18.9765897094288	19.0557385057625	16.7081547455127	21.135270663041	18.3363423015606	19.0502417045034	18.7815280528502	17.0703173959947	15.7828459094043	20.2261497571831	21.1799040130025	14.6155562330005	18.6459224765094	19.2950824305054	17.4741008352361	17.7903852965584	19.1918671577312	18.88611013417	19.3186635148501	19.4512746111919	19.1231942415487	18.8957586775445	16.0111296603332	16.6973116399018	17.2998200568676	19.1854317126303	20.8142708015438	21.5234244487256	19.1308101762576	17.4419691835526	15.353977497704	18.1732963162988
2.61x60	6.58x58	21.4817918712569	22.0835403185268	19.0865716670124	21.1234654590576	21.2201822329593	17.2811343088352	20.1566030372183	19.9672034596736	21.5706004088899	20.3288467700458	20.1603377699879	21.2355336876661	20.6299292776296	19.9592751371386	19.5879864713043	21.5380677174161	21.206320024936	19.5213732355078	23.864178699465	20.9836932402282	21.3344000149992	21.9491312356549	20.3104159238554	18.5595480817826	22.9948212647979	22.7302243059764	17.4545125397417	20.8703929526974	21.584688948419	20.5308802295469	21.2135438812095	21.8110046306904	21.4220875033224	21.4524564793872	22.3539139525945	24.4044685457397	21.8946342741778	19.0859438854881	20.2157470799375	20.811473830558	21.8048276535266	22.8415716184329	24.5266033930506	21.7528096116341	20.0836423738325	18.1271699114892	20.9710721948116
2.61x60	6.59x59	23.6080414265987	24.4181408383194	27.3750410775947	23.1875386576497	23.2048677867382	20.104552195958	18.0329932623511	21.2124454742965	22.5898523456883	22.4178064493384	21.2304440839093	23.6896677477756	22.9145837623117	22.0669166174162	21.1571591193147	24.5371647913935	22.2774897374008	21.2052056108872	24.9951302657138	22.704066375872	22.5789928916238	23.5640982216591	21.079728200335	19.347333123715	24.9963705365399	24.8725361392842	18.6145135579741	23.6814187286151	23.8603214772978	21.8621370410123	23.1410559179999	23.3490205576165	24.0239389359863	23.8508821430152	23.3938741768011	26.8580851327864	23.1882308510158	21.3802781085747	21.2825644601397	22.439128369881	22.6474271827949	24.8149867217373	26.2411591397941	24.2052200155256	22.4797672585817	19.2847765867277	22.9776574959242
2.61x60	7.32x31	14.4860204680236	16.8903857267974	14.7195641579498	13.9939574817133	19.0740597409151	12.964711720667	14.2303259976713	13.9812023445768	16.3438645980686	14.6483379603285	16.2617752105974	13.4682871962251	19.3136342514815	15.9575106767942	15.6039804216745	14.0441429072763	18.8529669283113	14.0831666183426	20.5215956007324	16.5951903273207	17.1584604787259	17.7851433786742	15.321589636849	13.3615629699523	15.9660520480174	18.4422945698197	11.6545385580039	13.5284229309998	17.2807345329995	14.3019673471869	14.5706776095005	16.5439648512683	15.0492083844965	17.7750576370374	17.9732956632889	15.7288556481392	15.8810177570583	11.7540552151162	14.0040275992302	14.3870923052575	18.2639928000424	17.7813092037679	17.8669799630492	13.8106090379824	16.2715757688062	12.0391212719201	15.1344144584454
2.61x60	7.35x34	13.5271903217187	15.0018591181227	13.216359370114	13.3186112264004	15.8649659942907	11.0002951324044	13.4883004489076	12.3633979956968	15.4271223823499	12.8767432217933	15.2284465721228	11.980726605678	14.0084374931682	13.6361477698065	14.4333537682688	12.6522119410007	16.7843310560773	12.0378245958313	18.3089603473272	14.6920194323313	15.5224930020922	14.7962464496912	13.4403349288625	11.2222267843775	15.0837675664935	15.763317734538	10.6253126542234	12.1241291233639	15.6306523856172	12.3604072343916	12.7723304451459	12.7602346765253	13.7723715096566	15.1841972128921	15.4361385391554	14.6347101782031	14.784937470277	10.2400522459605	12.9740956524915	13.7014474052926	15.6116705063872	15.9525999134937	16.5652712323101	12.2889799413946	14.2997239833502	10.4172194466662	12.8574502137866
2.61x60	7.36x35	9.95432172475855	11.5365300675723	10.5356629596813	9.98911807918998	12.8514929093861	10.3872428006666	10.0831615081779	9.8578732493373	12.2736088824763	9.74670416089459	12.0413392112339	8.8889990437619	12.0091177444473	10.4396209701311	11.3749313844084	9.35443616686757	14.6462107386177	9.93439137541903	15.2896481973916	12.6437793796001	12.5356793992189	11.6627419160333	10.6918409079073	8.97171399454976	11.9175503355346	12.922443576971	9.14693025008937	9.09324853943848	12.5716065401364	9.58902106578143	9.97423586045568	9.47013458193705	10.6360135859259	11.9833429809882	12.5320035509092	12.6425501383226	12.0559686877496	7.8303877937175	9.59257973644213	10.3100562559086	13.3320567805572	13.1392021447271	13.6566759132667	9.16148246737394	12.2473190535725	8.33902548263285	9.90478338985765
2.61x60	7.39x38	10.0908677030273	12.0377028539502	9.88696930307766	10.094761067009	11.4859011836251	9.28929028505407	10.440824632183	9.60539207945204	11.8752221452906	9.87397964348722	11.5831042903015	9.13344239594251	10.7239743099282	11.4069780836118	11.2337442110812	9.29717812026854	13.6073293118084	8.60562409125567	14.0769924699845	10.8252653085271	11.9028589002811	11.2773586003106	9.85046816146319	7.75198252062013	11.7547830264961	11.6868247612429	8.99427073197155	9.07419120362802	12.9172358498248	9.46350236434693	9.77800562487054	10.7841644553484	10.009573717197	11.635027975901	11.6787322514047	12.1557474060627	11.4032967163009	8.00539137082004	9.92258101503838	11.01298424588	11.6293695873852	11.8360329080313	12.4940717142171	9.07715913708689	11.6987493776044	7.23922350808428	9.54942982591107
2.61x60	7.40x39	9.04651275354211	10.0181308635893	9.83233512447577	9.42514917653827	11.6678543871613	10.864457740725	9.56346537610714	10.3209897781172	11.4947596321106	9.16754132796793	11.0239820845283	8.43135831286988	11.6440067416676	11.0447834292937	10.6392184393404	7.95827236276819	13.4343939945202	9.74191202998672	13.8118466542313	11.5363345998632	10.5402796926837	10.6248426341288	9.67731791355435	8.72791687632278	9.9991962176967	10.9608024341286	10.2016574143617	8.73613398477839	13.1939016594789	9.14953272030873	9.24181345840739	10.0262515926941	9.05757335051724	10.0055465118103	10.4312731725327	12.6498930430261	9.6365195480526	9.33722426634383	9.17264307601686	9.96250314930941	11.5092979803288	10.9439935581121	12.4388092677716	8.22034463997709	11.6746913449564	8.35919924394676	8.485286147208
2.61x60	7.42x41	12.3161199247165	14.2964539659316	12.2958233965847	12.9491229818857	13.7841859389664	11.8038614868186	12.7490537295911	12.5130478301651	14.1658605456922	12.8398035421108	13.9118513505572	12.1364099304531	13.5958808467859	14.6412019656857	13.7866788604072	11.9259453713322	15.6011969733095	11.0907147199808	14.748862295106	12.7682447110008	13.3640554847696	13.6735207243782	12.4834596967347	10.9838638920919	10.3538384669648	13.3767298320628	12.4022235103227	12.0932994670603	14.1766818049923	12.6189147314656	12.7152208396079	13.8933396273178	12.286241776882	13.5296963750115	13.4011937527968	14.6893653028305	13.1747478533746	12.3708803647922	12.2358380178883	12.9811882738061	14.7758258314045	13.7778923279288	14.3469002226962	12.0559194589214	14.0436215770719	10.6322293523042	11.9148040269238
2.61x60	7.43x42	9.59063762218133	11.9948125871145	10.1934042890489	10.5593318443924	11.123091791404	11.0519099706793	10.1413827952602	10.5368904805925	11.6785212248812	10.327674762501	11.4368395109838	10.1679241244219	11.298569998013	12.4210707267932	11.247823878422	10.1104297139142	12.413360785863	9.87002294830158	13.0519148403596	10.4728602110407	10.0939225774721	10.8198681137988	10.1442512784335	9.88304472316098	6.64922709794154	10.4609666857323	10.9837273272783	9.95831742816024	13.3064033833339	10.5415311032127	10.1499049256631	11.5802531060422	9.67981518418611	10.3904449375376	10.0542436811527	12.0399060212279	10.3834474525564	11.1960409967095	9.99016286153534	10.4030909349097	10.7449643554551	10.7259696997521	11.3347474607951	9.86202240922216	11.5446488902868	9.74236377887831	9.94943003392657
2.64x63	2.65x64	3.82782523112015	3.77873589974214	3.81094660156765	3.8444290863534	6.57378749276245	3.80601129793384	3.81179616453976	3.79409277693627	3.8093561135709	3.88382105663997	3.80332880513899	3.81203370918989	3.8896819921428	3.81834375089514	3.80929048511662	3.82062966014766	NA	3.83557153498667	3.82432490774516	3.84123365600168	3.80677724591287	3.87078312489862	3.81588089436764	3.77687979686937	3.81394362831964	3.8079645481543	3.85996955946546	3.80487279682252	4.79620693882155	3.80959289163554	3.81730716605306	3.80618693708021	3.81989293043666	3.80702469127795	3.85394148891755	3.80783678746871	3.80863558246257	3.79035526039447	3.86879050867322	3.82694199067611	3.86788378832663	3.88086652694988	3.83724041467303	3.80974552955968	3.80612072851086	3.85946149093368	3.80955824210629
2.64x63	3.28x28	11.5164856184515	11.4390609317374	11.4032776428534	12.0886418178388	9.27258356662263	11.4485879041915	11.6899314796965	12.2250806950302	12.2472470784254	11.3929995172474	11.7034945635908	11.6884510949912	12.4998301188456	11.6649493355093	11.8469188399347	11.1989346814775	11.8399672296844	7.15350732158708	11.4371911761586	8.66136802127701	11.9037611703192	11.4242134521375	11.825770841683	11.8627561721549	11.7233415884721	12.1929278682358	10.9095244167654	11.0985199914223	11.3999570174628	11.1376752062538	11.3843818013979	11.6738578028002	11.1338647827248	11.4815506356938	12.1502997905401	12.2846549402089	9.37303382048737	12.6587352843797	11.179984615374	11.5211213863929	11.338795791441	12.2080845753951	12.2907901291984	10.8761303780343	13.162086536716	11.9784545330356	11.0219947831597
2.64x63	3.29x29	12.2961054403417	12.9611399961577	12.2256349119381	13.2783017362914	11.8198224182938	13.2023961840266	12.5771826336426	13.5526105603312	13.4224203480594	12.1658500319542	13.0026257732813	12.5803233662732	14.6142295725775	12.4333756076136	13.2787968581495	12.2334110124691	14.6043948522354	6.94735424460276	14.3919817606888	10.2567406616332	12.5914121924429	12.0623797817844	12.9067057764559	12.1283112179726	13.3172616179153	14.9159989608474	12.8779504968764	12.2049534616073	12.8410905300134	12.5068911005094	12.3798151036274	11.1592279750886	12.4971813622112	12.5833291699773	13.1162111907364	14.7558459262761	12.4368369773026	13.4918423871612	12.0753057932294	12.5777417289432	12.8000292968415	13.7089813625958	13.5367698879755	11.8698504202875	14.5209661524294	11.8888497761558	12.254310017296
2.64x63	3.32x32	13.9430503836141	14.6162901927952	13.8641271632945	14.3806819727021	16.4538312255839	15.2507353593196	14.1312103515587	14.6985829589114	15.3962284017872	13.4677306551624	14.8621410637902	13.9577867156652	17.6547603212278	14.8026948222275	15.146362533625	13.9195222619169	17.5264965694802	11.8651766948495	16.1972561256529	14.0118599407787	14.3200703908884	14.4284921249589	14.0694022971838	14.1293796749893	15.4419371194161	15.8222391588549	15.1038614268008	14.0991577762645	13.8410412903076	14.0584885745232	13.730902592328	15.9168697299438	13.2799184485448	15.1166002791633	14.6409200189059	16.2456792409551	14.6587713673418	15.2787241941204	13.563354526075	13.9820037905874	14.6963303582901	15.6308480576071	15.869010492151	13.684438095881	17.108289014393	14.0463944839948	14.0814751357945
2.64x63	3.33x33	16.9063676169661	17.7176624022471	16.8256076859054	17.3993279180548	18.4060673420478	18.3429102652769	16.9669540578149	18.0111412187013	18.498343006875	16.4531332578327	17.9721183225573	16.7022849035693	20.4997044612843	17.5665883141833	18.2558390658989	16.560714326381	20.4333827351224	14.2424276371692	19.5444097889908	16.6047644367513	17.2120430803551	17.5330866078965	17.1574025423431	16.5953855032054	18.1506502362863	19.2821804005667	17.8416925766588	16.871184368621	17.2368799090787	16.9707468604066	16.9078771287232	18.4285546096269	16.3587942709724	18.2324502467441	17.7459056122814	19.451142151555	17.521137320391	18.0811540284352	16.4303987170123	16.7481695119198	17.5695832050735	18.8554378628554	18.8476582365025	16.3567882544221	20.2979643806959	16.5157624407715	16.6694857149223
2.64x63	3.36x36	19.229700647696	19.8306799177436	19.0586672671517	19.4025381071653	22.5699218208659	20.7660012761244	19.4652540697521	20.087721299341	20.8131271557159	18.0188733277084	20.4060920805528	18.927711140019	23.7068278983081	20.7348429702277	20.8745837323766	18.8543294497577	23.2732263341377	17.6184808652733	22.2300792621169	19.4424041980409	19.2429937379816	19.7080214633535	18.8044485428316	19.1523996668825	21.1619461770415	20.654971532297	20.5899179697249	19.0813695787278	19.2463890899046	19.2272301177263	18.5183278132773	22.0170456919179	18.0315818773617	21.0476217421352	19.5892454423339	21.0013306483185	20.4260235484051	20.220855248975	18.8362862847218	19.3534050234061	20.6601080829699	20.4955222914665	20.8926656030292	18.7550975204076	22.7403034500422	19.0015749347258	18.9581124060387
2.64x63	3.37x37	22.2089567742386	23.0474021529542	22.0103816186817	22.5350834256277	24.2356745728276	23.8803777398935	22.4566427811461	23.3968499802858	24.0189893417687	21.1273362968454	23.5549673954349	21.6830309689397	26.624627340115	23.6176258967746	23.9091975189466	21.7427349245673	25.9644667574745	20.0525032352572	24.681433365994	22.1732002200855	22.510143158141	23.0012246847858	21.987841754024	22.3018761766807	24.0906530837169	23.842165505675	23.7449948410186	22.1297897866202	22.4023881093066	22.2043539424141	21.6806799247625	24.7656407952631	21.1670918881173	24.1423157547075	22.8694476977473	24.2480300436963	23.0149027805898	23.4693859527683	21.8237286685846	22.2155442427144	23.5689969875682	23.6559497378566	23.772560842282	21.5600930192799	25.5166992771401	22.1374914568024	21.9459673972236
2.64x63	3.40x40	25.5570074343613	25.9143319998799	25.1362776281613	25.6542265718536	28.8082366867533	26.7794263754846	25.6231187211861	26.2051438843598	27.2330157345822	23.6357911016323	26.7071739800376	24.8913100900696	29.6837989987805	26.7282264843742	26.957971622509	24.7217460143898	29.3800333900423	23.8733072698359	28.3336100417861	26.1333511054361	25.5243360148702	25.6876522282594	25.1090953640309	25.0013764021103	26.8603118001262	26.7185977364082	26.5686433413526	25.0556692387172	26.2156331985325	25.1755121894272	24.9648305421847	28.0549167526835	24.2577600779627	27.1965606097536	25.8328674753694	26.3850730717199	26.6857300068782	25.8977736880991	25.3865538622319	25.4176200498788	26.3638455085748	26.9752062457361	27.6919289866199	24.7115806455192	28.804924769907	24.8598286800211	25.205997500595
2.64x63	4.57x57	21.1888917360017	20.878019518144	20.555492356059	22.0655345278559	19.2326633101087	21.4931218300181	21.684449105292	21.2864684247998	22.0975853431998	20.1666384159582	21.8372313492347	21.3916558265133	22.6549079450789	20.5744553755379	21.5353725298635	21.5418909105027	21.9348352626593	16.5770653615168	21.4720815479077	19.3141632228787	20.9535595544051	20.8891758813028	21.2986101893997	21.2048163396904	22.0584215663769	22.9062467025918	21.2628571927669	21.449490320285	21.0362689895333	21.7057359009088	20.6267424718495	22.0643491179776	20.9860568949958	22.1105118439171	20.9942863893965	22.4262595632887	20.6157084282835	21.563720203156	21.7210543712777	21.5558913756773	21.2397592029665	23.0792125082291	23.9324705369086	20.8972001234615	22.9307701789539	21.0575996257883	21.2682238562603
2.64x63	4.60x61	19.2128919738805	17.4674110846456	18.5736991738318	19.372861275506	14.477859544836	18.0886647378959	19.8958835943519	19.0342559087557	18.9809544017154	21.746894628889	19.0207251701926	18.1508227086267	21.3969300134388	17.0605682496217	18.3665182601385	18.233370807396	18.5568522654032	16.1585859220416	20.3751304044907	18.2686811237155	18.3104144409677	17.6566837769724	19.1371262471668	18.1636834645399	18.6589439411774	21.8342709060779	17.4428175476326	18.3906726630648	20.4319181918879	19.482525016024	19.1025076102589	19.9674177599408	19.6058099807175	19.5186043302281	18.0587954470945	20.2272515681197	19.3823441822706	18.2405112318707	20.3961172285315	23.362463269099	18.2228746634553	22.1646490836196	22.2070832618784	17.9061469333858	19.9115530283301	17.985797980629	18.3736561957603
2.64x63	5.38x39	23.7087457702849	22.6477492479937	21.9928239660122	25.2232764128691	21.7337921449525	23.2783305887686	23.6850398564157	23.7811897515663	23.7866268941185	25.0673119021566	24.1337977326404	23.9837453497155	25.6491972778877	27.9848194920032	25.0384268874864	24.4287638246392	31.7737085968887	18.6002793527409	26.4577501122072	22.2355741999167	22.7505899264173	23.2726432748839	22.7034121224102	23.5256497040996	24.4807875281822	27.8399285918624	24.7346517258683	23.8627987880718	24.7379916120933	21.5402785729433	22.7078302574244	24.9973872434701	19.3869362458332	24.6520875789455	23.1865989528434	26.0089796224304	26.2414388706107	21.5606080619263	22.9079443206936	23.7898092888531	26.1172284325883	26.3197132773136	27.0275326657836	24.5360752770283	28.5071892862134	23.2068107244404	23.111071567541
2.64x63	5.39x40	22.1704001317071	22.0096930010393	20.4850253111877	22.4054313504561	21.5332959622999	21.6436777142888	21.9843351502837	22.3325880945313	23.2305387152343	22.3645532036748	22.9632558013884	21.0748576507648	24.1790002688283	24.6517414800659	24.061953266516	21.4111728310245	30.6507168268541	16.8225701365755	25.20572415147	20.7255478335314	22.9546540161249	21.6381452763401	20.7434693819525	21.6511932927495	26.5660939168708	25.7543152694844	22.6840169943509	20.9777289762262	23.1263396368729	20.4973007247296	20.7839133225675	24.3231925947232	19.4046670932536	24.2599705275996	23.5816302023418	23.5418151169361	25.2043902128181	20.7479734191077	21.2790509421825	21.907828326879	24.1339442901487	24.8967363523816	25.1478725939194	21.8747173924602	26.1458600547008	21.0402860484357	20.4030490123413
2.64x63	5.42x43	23.8301553708741	22.4856723048256	22.4698516906543	24.6402591098389	24.2908223203744	23.1821874938497	23.6819709061556	23.9869248341675	24.6265056595531	22.9934711168192	24.4168621038822	23.7887145091953	26.5287082422043	25.4221391900839	24.7165761382923	23.9193721489507	28.9053541407124	19.4601268495352	26.6126462607536	23.3114042048093	22.8089747467965	22.6977016677901	23.0814394265176	22.3277507599848	23.9986021467918	26.7185021286748	23.9117499986931	23.3486291674693	24.8762921272444	22.391090594252	23.8596406720638	25.0921641354428	20.3237134894192	25.079984549437	23.8156410999158	24.7448653663745	26.143473621537	22.1042304548247	22.4823160728605	22.8577792884611	26.0135852392553	26.0643379735607	26.3406153496838	23.8560474722868	27.6253219166764	22.0955519731913	22.7922587735398
2.64x63	5.43x44	23.380579120287	24.8023695238983	22.9951503800258	24.1380531112184	26.066257326283	24.0958124992705	23.3897372794138	25.3732475256913	26.2577050406162	22.6907478942409	25.8398321395477	23.1255705010709	27.0831172688817	26.3344696737945	25.5944633465912	23.1797691317235	30.2715018788299	20.812618311976	27.585403187193	24.6879859445845	25.242634034506	23.5833857620148	23.0053388151533	22.9915522529472	25.7099135159961	27.1622839429971	24.717641109135	23.1081218838745	25.7395692660153	23.0047870453086	23.3308028580244	26.833932268678	21.9049091757989	26.6285160307517	26.2076870211776	24.4044051966033	27.4813355934532	23.7536609388953	22.9432523195819	23.0833065439074	26.0011497053496	27.2230692795651	27.1114152341777	23.7545974708055	27.8156305339282	22.5061378739223	22.6397782012104
2.64x63	5.46x461	24.6875850985875	24.4456328410618	23.572336116728	25.632234900609	29.2659828128153	24.8426844362682	24.3912048492894	25.5737859731405	26.4008891327546	23.4949576079635	26.0358500725442	24.836546801035	31.016896459833	26.9124829772357	25.6977171165067	24.6512375348582	27.6092516740313	23.2968952008631	31.1080950718619	26.9376376469801	24.9242466084734	24.2827572775416	24.4881204260352	23.0764619038535	25.5804406138753	30.2051736296946	25.627527290006	24.7218742007963	28.9348112314561	24.1654807318208	24.3596948051489	26.3622430191363	22.8893965626008	26.7072746082411	25.4886709147417	25.0386676562472	27.6712619517072	24.2677340928237	23.450132920732	23.932816403424	26.933802813565	27.9494232677528	28.2891884295043	25.0243771950472	28.6208908491682	23.3495871055571	24.291926168997
2.64x63	5.47x47	24.8474329257571	26.8929763693051	24.8943736816173	25.8113623042256	28.595538760443	25.7770140629205	24.6506720800874	26.9581239146941	27.7134717781804	24.1192612656358	27.1894955635444	24.6922502214764	29.4732490404434	28.6819255978395	26.8901703601892	24.5461384539402	29.0350358015967	22.8933481387061	29.4003988748452	26.4139736124651	27.3763756731968	25.4994938969384	25.1465968671707	24.2476019020438	27.2947240689478	27.8006856929825	25.8302729757159	24.6242661819596	27.135134530715	24.6359035961744	24.555236366201	27.9410160516757	23.5491433814481	27.7922454832279	27.9820633620897	25.8175289483715	28.3174463714509	25.217098980652	24.5213843410196	24.41375393093	26.9891613059761	28.2225278988258	28.5080338676661	25.0241083957051	29.2617697687614	23.8373643467561	24.4629380696596
2.64x63	6.48x48	20.5549073459357	22.0874057779541	20.2398862892063	21.0641129412088	26.810416893439	21.3594866277259	20.5086308660525	21.5838442127439	22.6011580897971	20.1023997074976	22.2206382221573	20.0926781191557	25.4810785486015	22.4596254866371	21.3128256221459	20.1380250024673	24.5042993370551	18.6845033383283	24.5520244582804	21.7841453125892	21.646727743472	21.2003375680672	20.4016272635297	19.433530687963	22.353944282833	22.6050539039393	20.1980357708367	20.3337431871262	22.8990951349611	20.266862460677	20.6663893556664	22.2674447568642	19.6672931030175	22.1176357461642	21.433271775443	20.3784714834062	22.2541666660426	20.4479615365444	20.7447835129702	20.7591411190348	21.3017081005256	22.6300021431727	23.1704033629111	20.4892794163192	22.3086923417757	18.8407424482158	20.6782955051909
2.64x63	6.51x51	18.730222903105	20.114430715285	17.751165764535	18.9755507429956	24.4103822174091	18.1564750433557	18.2264191217035	18.8110725106252	20.1924172153806	17.5035586667397	19.6592700780065	17.757286419946	22.8807816300056	19.8763637771097	18.870995893169	17.948155504118	22.1864944955259	16.1445200919693	24.2241769519627	19.2440509768604	19.8750644527257	18.4779006924488	17.9862549186872	15.8999708490299	20.0224010048745	20.4760231734583	17.1036199092473	17.9219158853065	20.6729756445462	17.8431677120404	18.1218534372177	19.8220632124913	17.8509575653521	20.2495451800775	19.8547435893793	17.7807328026716	19.8962722890495	16.7295557621833	18.4440956948287	18.6485282261094	19.3569326599025	21.0390350539182	21.4931483501138	18.3214717203613	19.8442855502535	15.1611857715681	18.3027037893312
2.64x63	6.52x52	21.1579555959455	23.0398482850908	20.0896175672908	21.659459503875	26.0856856915819	20.3332040269113	20.7512935741365	21.430681977016	22.5880948731849	20.1199541251962	22.0883550541909	20.7068757179831	24.954635220736	22.5363690287499	21.4855153533724	20.8229277960617	24.1027484117476	18.2101574677431	25.8694443117745	21.6591882811891	22.3467493161757	21.1575155913921	20.51657978319	18.9421707837301	22.8668324435196	23.7452330795046	19.9125203075854	20.8314590943601	23.0887535393317	20.3352327254939	20.7439499372709	23.0756336641055	20.3141240027721	22.8848623766891	22.4013753595622	20.6713583007987	22.4961900996591	19.6178792431802	20.8379620404684	20.7473551326428	21.6971216063329	24.1573420309437	24.3282553834014	21.3641381291172	21.4219104190079	18.2732928888036	21.1411384745477
2.64x63	6.55x55	20.645001937515	21.5337115704655	17.2317563527343	20.7557848803653	23.388088549516	17.6785232414928	19.0450840113663	19.2499094283584	20.6960644084811	18.5005725857337	19.7497370868576	20.2578327073752	23.2684861131961	19.9855104763426	19.0675070735532	20.536493103741	22.2545751251288	17.2441036299368	25.4114719172267	20.4450863289936	21.0528211173705	19.7235573616932	18.6263079809177	17.0233743423565	22.4852575035288	23.2523397962442	17.1168291748209	20.3075222023761	22.0663378701587	19.0308611733679	19.705265717569	21.362672164315	19.9718605542899	21.1423820086574	21.2290573271636	19.3210108172425	21.1979487215155	17.7802209491333	19.2023103818265	19.2407073414675	20.5172481585616	23.3911592273662	23.7896253438342	21.1408606494627	19.9262899206049	16.237742115208	20.2134306588466
2.64x63	6.58x58	22.6535705132767	22.7847308081531	18.8344449878408	21.312786232682	23.6628717192145	17.9708807519276	20.2535388018983	21.1748610857309	22.3051808779933	19.7246588310166	20.6585034791971	21.5163798534977	23.7029196724792	20.5546436845789	20.1338246242486	22.0195009253162	23.3190003859514	18.9344345571765	27.6648878906096	22.1181000540281	22.2503435928527	21.9089287049824	20.7347983351659	18.3914941209245	24.3289334332601	23.9013858384823	18.6488834250204	21.5007418244115	23.5886529924877	20.991684877589	22.0985991863738	22.7733159201729	21.3922387094011	22.1885579973102	23.1890321919652	23.793919265224	23.173763828951	19.6356511478484	21.5792890985778	21.6442077702096	22.0180370832643	24.4452947415244	25.9924359766452	22.7390830290054	21.558512796573	17.5804019578621	22.0135155983773
2.64x63	6.59x59	24.95871128484	25.4113472881703	26.6310341143561	23.669567148556	25.0059681876147	20.6381682084433	21.4146082383031	22.3545385772107	23.4112966962533	21.696781996416	21.6951190132712	24.2009094250609	25.905915772271	22.871852176857	21.9796362572268	25.143541397345	24.6963967614711	20.5196518001646	28.7725292249395	23.7363116342872	23.6451071048536	23.7403271670801	21.8452838388518	19.4541721489248	26.5126892449634	26.0939929868926	20.3238632646453	24.3775187826817	26.2093761467151	22.4706791397145	24.0884668046765	24.5469401351777	24.1862341425862	24.7557487061086	24.3671370086845	26.7695696267236	24.6943389464063	22.1670618260517	22.8735862951134	23.4073629655286	22.9896589796369	26.7214796933104	28.0405301483406	25.4222977915058	23.7523679030113	19.0548477821262	24.0695609432328
2.64x63	7.32x31	14.1440847706736	16.7224243756699	13.3233153906976	12.7197488182747	22.4418033366305	12.9709062906182	12.7219002511417	14.2759720859912	16.1347656320134	12.4929328021886	15.8553717711065	12.0744234230873	21.1900914816336	15.5282705411775	14.7735153907254	12.9014931693971	20.0179367568189	13.6928900163552	23.7216014847227	17.9135888643231	17.1316857314159	16.7226179170607	13.971186492206	11.7065069939756	16.3353266572787	18.9412300286967	10.6814567358577	12.6991633582689	17.4805160392936	13.7247790874753	14.2835492087926	16.4029985673352	13.75748280028	17.2525377553565	17.8117709956085	12.4019892356025	15.3688252316174	11.4813668175875	14.107853167651	13.789835459497	17.6261713653306	17.9305581062052	18.0147499843878	13.3148294393883	17.1172787849004	9.85725423229005	14.8980247348432
2.64x63	7.35x34	14.9750942901873	16.4025693109342	13.630136646417	13.9082644136499	21.4927141608499	12.9446644220698	13.8400767700183	14.5130992555002	16.644754278751	12.6291317595471	16.3887064773276	12.5041239197314	17.5271265756826	14.7391928205041	15.2957183878365	13.3206986678627	19.1958828137702	13.1357032548699	22.1967682782877	17.1352830440585	16.8554736806772	15.1290168219881	13.8024976725229	11.6658604054737	16.7261518287979	17.2802318271486	12.0559184635597	13.1596707405619	16.8704298404042	13.6414186212432	14.1614881633252	14.0335431021535	14.0683282233533	16.3444014879714	16.6591543002639	12.6779563416191	16.2908555330897	12.0801841873375	15.0133894241107	14.8859594920852	16.3712931071434	17.480995881242	18.0161261374359	13.606345027229	16.513487971958	10.5258862334722	14.3639007933082
2.64x63	7.36x35	11.4493529074791	12.822228004524	11.1913034986993	10.8011148498662	19.6929917991147	12.6231181963887	10.6179974571479	12.4115707708573	13.7208857950207	9.5970423047937	13.4152632847813	9.64109501042283	15.6056381477977	11.7396941612633	12.2955780669312	10.1610813400937	16.8916371320248	11.8045113833653	18.9000885976759	15.4661049071833	13.7310349209373	11.9625210553629	10.9949883583385	9.55852964634206	13.3587140473924	14.4524332207418	10.6463188943409	10.4161055102183	13.2991750872	10.5642895643768	10.8931892942333	11.0986285639263	11.0014702199297	12.9288145628283	13.4172081298607	10.3853706241039	13.4775563437887	10.0007624209357	11.7457235622162	11.7372131700843	13.8397735530608	14.5689604296257	15.1711875276789	10.6038537334311	14.5201936970551	8.8149884855285	11.5047709234039
2.64x63	7.39x38	13.5249880591444	15.0968096298523	12.7152999178155	13.2215993359351	20.1226668709692	13.4772956486084	13.074991816441	13.715616099906	14.8440859940921	12.0808707053755	14.5710466336499	12.0039630539252	17.4320730264648	14.3389020500176	14.0405024482744	12.1576590263093	17.376637563119	12.0384707915914	18.4742095906699	14.7951984440899	14.7444137218134	13.5516101626338	12.4218622597419	10.9011447105338	14.7989360090515	14.6411676105425	12.6614561958726	12.2710314562387	15.3808457829861	12.7791923062453	13.1583673759323	14.2880343644604	12.4330399339824	14.4231557226566	14.4297519036191	12.0235549651507	14.4822016972558	12.0771159222722	14.0832583587748	14.4749796891049	13.8999931294947	14.972908000786	15.4455627932426	12.5205022662831	15.4791499120591	10.2972524976326	12.9847167855137
2.64x63	7.40x39	12.6785911677915	13.3081766219118	12.9657046086975	13.0191903358081	21.5484708970265	15.0476311092477	12.5269583698518	14.6416378182224	14.7168821086533	11.9333393901288	14.3911599254542	11.8077383947986	18.2970190468284	14.2134980916029	13.7310461728158	11.408688662594	17.1614389256845	13.8451836029718	17.9938170769851	15.8857595978285	13.4986274117038	13.1542895665254	12.3977595153318	12.0912434430872	13.2560186330587	14.1208047221113	13.7011888900197	12.4116736180098	15.2653575130096	12.7474431161704	12.927178114345	13.6605578216997	11.9344235302758	13.1169282227205	13.2787078814168	12.3351444661179	12.9481616841929	13.4381472309244	13.4998921847547	13.4747511294272	14.1158599454656	14.1728960343326	15.4210918549887	12.0747502251599	15.5486208713185	11.7258887936054	12.4135845346942
2.64x63	7.42x41	16.6891566293806	18.1861997404625	16.3695601956803	17.2269883032409	23.7561802485164	16.8123023408455	16.5662617086656	17.4681004691409	18.0943830234689	16.2851223513979	17.9780616585882	16.2038479689239	21.8880308159505	18.3594327254412	17.7095593959872	15.9818525521918	20.2549285113525	15.7184787431863	19.5051793634409	17.5214904902522	17.2696586243041	17.0524529027351	16.225317901354	15.2611778378997	11.9758323301556	17.2655408545461	16.9000646448468	16.320029687473	17.7192263375126	16.7952308111559	17.0583745122447	18.1469248910111	15.9763345921397	17.4316126907409	17.2592793882016	15.814792821912	17.3264273005141	16.915115695732	17.1431159361418	17.2937349927654	17.7697252933184	17.8797475932967	18.222102787549	16.453735958742	18.6381802223286	14.8913913721989	16.5450123904456
2.64x63	7.43x42	14.3302642334327	16.4262127710559	14.871716276207	15.3632286645744	21.9645467287627	16.2496323035323	14.5029236018122	15.706706242876	16.045767105377	14.4505765628919	15.974942722902	14.7267582990962	19.8559058468759	16.6173159385022	15.5980016027695	14.7054056387439	17.3299071549735	14.8154867621688	17.500896491323	15.5123833436387	14.3272338223399	14.7938098203269	14.4105998140258	14.6085809714702	8.39306130086038	14.6487036286492	15.6774262237141	14.5977785638775	16.441244660913	15.1305997567843	14.9374815815786	16.300148005463	13.9264732793339	14.6713267634526	14.3150458958398	13.7550205379709	14.9368428725752	16.0192300064641	15.1816557068062	15.0355560588892	14.6217681899283	15.1055905213931	15.4857252332592	14.664060317661	16.3717735447324	14.4382183111352	14.9276166215508
2.65x64	3.28x28	14.4675818642923	13.8648152530064	14.3358669427419	15.2643919629968	9.3983322988709	11.6591329437484	14.3130399985468	14.8412184809739	14.7280195885258	13.6106341512804	14.0990051067442	14.8699817081259	10.6256684025053	14.0808146781356	14.1650007412637	14.250571953434	NA	10.7601406124641	12.3678991344529	11.9554046355613	14.6753854123154	13.8641887249128	14.5370820662195	14.2987454344778	13.9654255932284	15.5130069941324	12.7983176238129	14.1052984725599	15.8023874462057	14.2086633079963	14.4020303082586	13.7171184656254	14.6430092877113	14.5462895612593	14.7855235281	10.5427369311768	11.4401897711533	15.7499311109605	14.0387670398793	14.3489834134687	14.3250857240018	15.0685842068855	15.1931381221919	13.8050720027097	15.4886025515538	14.6366930008114	13.6994008993094
2.65x64	3.29x29	14.6753137274813	14.8597926297778	14.9383932536267	16.3914901702072	10.6503927627107	12.4101402490061	14.7843339045085	15.718429469893	15.4046371589856	13.7337457745511	14.9466080767511	15.4035123591991	11.9210616137993	14.2295469358655	15.1307102939684	14.8709329229877	NA	9.92765924072739	14.5701359636758	12.7529306827882	14.8373227369361	13.9173003847729	15.0775201210279	13.9153753093476	14.949365036683	18.1070862647749	13.8225177880153	14.6382035783084	17.063979166654	15.0722851286724	14.9865049961624	12.328507695581	15.7638621536729	15.1694625481591	15.2463940982778	12.37207314883	14.155004380077	16.1685328338721	14.3290527949338	14.9009828534899	15.2922047135134	16.1191708533659	16.041062340132	14.1140583816279	16.3016387213065	14.1600213982889	14.3425267648347
2.65x64	3.32x32	15.5834843985548	15.733645922036	15.5789531098851	16.5631255806385	15.7232899229137	14.0567766931114	15.3957105065015	16.0980922161603	16.5905865176612	14.0558990818802	15.9531283765912	16.0697888909593	15.6537991554766	15.6381661648673	16.099004441269	15.7956225265103	NA	13.9017268351813	16.8570414070797	15.779948383946	15.8153437205772	15.2590433841706	15.4399084841847	15.1156070668697	16.4418525720188	18.32707096074	15.8134042192059	15.951841931263	18.4713422630842	15.9457362639672	15.5380962797892	16.1108113079385	15.8993444518949	16.8341901201097	15.9548918517175	15.2107797630496	15.5231660752567	17.3623526055659	15.0561265270985	15.5237274196631	16.4290694502154	17.3059856119205	17.6315412825992	15.4020957340227	18.3702185615741	15.3363823961194	15.4418081842769
2.65x64	3.33x33	18.326030230249	18.76262343064	18.5731131477736	19.6235820124665	16.272107577078	16.8790146928072	18.1539358817861	19.3192033997264	19.61413495416	16.7859839151597	18.9826437832036	18.6928081892475	18.0137749791653	18.325335085613	19.149569446857	18.27131018838	NA	16.2488170030929	19.9760281087107	18.4678517971095	18.509338561926	18.2556983432571	18.3579255091636	17.3269791077383	19.1186357776908	21.9112165111844	18.2201489840232	18.490417977969	21.7044654852406	18.7478971887516	18.6339392239	18.6263456963517	18.9106723836039	20.0211484935305	18.9280131815254	17.9607455858603	18.5609035340417	20.0082257584225	17.6345912909826	18.0721637055445	19.2427186488812	20.5207179211645	20.6612543907673	17.750957467134	21.5347296477109	17.6962285812543	17.7871933705124
2.65x64	3.36x36	19.9701698790972	20.0643935617302	19.9026881099011	20.8047425843244	21.0688169815014	18.9832494847431	19.7572438867368	20.6986964565404	21.2279926983217	17.542719344503	20.6903740420515	20.2940930322101	21.6513368871301	20.8135039337446	21.0115468730886	19.9114954737207	NA	19.0325520359199	22.8346892468455	20.7121241064262	19.8658216291197	19.7262023207712	19.1717625167849	19.1453884786912	21.3787279789982	22.5440717041088	20.5059245341438	20.1413789994628	23.748817865317	20.2975775401894	19.418056210651	21.8067248801832	19.8163351556235	22.248998584206	20.052477004101	20.3783241214777	20.7224122871832	21.468946178143	19.4428696698815	19.9019959049338	21.722634209506	21.3292685997434	21.8990257774176	19.6369175279625	23.3710341662495	19.2847904059132	19.4429428328121
2.65x64	3.37x37	23.1824325513955	23.54593130458	23.1945501573107	24.1855115720135	21.8298259269285	22.2210234462772	23.0686953900735	24.2236545756415	24.7042851546043	20.7312060671829	24.1200538349316	23.1425065409951	24.3820308629121	24.0442000906664	24.357645616931	22.9423486373998	NA	21.8471472508426	25.4488145499943	23.7572088427913	23.2819301175826	23.2794516043656	22.5718441869511	22.5244110688826	24.6105402216205	25.9881735795342	23.8282253850344	23.3168449194997	26.9287031251043	23.5224465989403	22.7780444726934	24.8873275985993	23.1812683216428	25.6263212147198	23.5177674323053	23.2820538183383	23.7062596585796	24.9465417643408	22.6228330896022	23.0280084028124	24.895370613831	24.747005495615	25.0811859966789	22.5096726320042	26.4669701514926	22.729754134174	22.5768813391044
2.65x64	3.40x40	25.9104900185234	25.7697523076959	25.5531392396316	26.6563456985387	26.7691385554336	24.7482053692788	25.5186357198029	26.4837458453293	27.3357013079965	22.5347389379154	26.6972853676174	25.7006844072293	27.5883803982764	26.5881080560464	26.8018630322595	25.3005668908821	NA	25.1563409302704	29.0821484247639	27.2134182343931	25.6727321880629	25.3281085160341	25.0380927588345	24.5397453328269	26.7506972245585	28.3175756907261	26.1963373394068	25.6472270235985	30.6104976927851	25.8406097451279	25.3628248820986	27.7361890136334	25.6720682844215	28.120514468978	25.845289725596	25.9997555757742	26.874209141852	26.6714634206674	25.6489396466988	25.6062702086813	27.1350036852771	27.4124942498854	28.451102280931	25.136818633232	29.2648522292528	24.6607365867283	25.2075291133423
2.65x64	4.60x61	21.55738485995	19.3375971878618	21.589193847849	22.6254500286735	9.00639167480518	17.2925378704226	22.3173540098283	21.7288035105479	21.4911420357318	23.6400708543777	21.4846841726845	21.0551729035883	18.4621724073848	18.7791650506619	20.7071994002086	20.873931876865	NA	19.4806778629492	21.0345850921762	21.3748058704635	19.9873984800424	19.336118379861	21.4581909302718	19.6019793388321	20.2132858041438	25.446663317614	18.3872126490124	20.8124352731726	24.1408405404617	22.1388820178436	21.8645243945529	20.7910100524241	22.9714808186151	21.9146752200438	19.7097085721733	17.4337638793234	22.1600113944014	20.9408082222249	22.6085141042042	25.9442512514815	20.4787825810032	24.4655652295221	24.7065776059737	20.0193541604119	21.8396788208984	20.0517850078241	20.5600887643998
2.65x64	5.38x39	24.6466941799504	23.0099159711634	24.1520396240152	27.2343034058153	16.8122745932845	21.3294541186595	24.9204230501811	24.32516914638	24.4143716896422	25.2105049929588	24.4814794283352	25.1685894320679	22.0015456047979	28.1732062960537	25.3201301141996	25.3105656396691	NA	20.1835221158251	25.9287884406503	23.7192083341751	23.3024097680905	23.6185776667436	23.9282093145308	23.7202023810928	24.9305374992197	30.7363277897669	24.2976176815753	24.2920735014531	28.0846325594621	23.2001464866065	24.4217305897842	24.7317695687146	21.9506633384962	26.0361593365842	23.6890321034862	23.1765269615618	27.6685095189459	22.9516286350228	23.5189133464963	24.8248428192406	27.7325243351556	27.6154705554694	28.6358766584856	24.5296508536098	29.8621676038428	24.1740343964345	23.0150895935688
2.65x64	5.39x40	22.5738846014593	21.7689977950295	22.1420397434383	24.0940580434264	17.5439936445497	19.2148241990397	22.7011909379222	22.3564006718434	23.273118506122	22.1192716426197	22.7514276694892	22.0121415586944	20.5828648151806	24.6053336697554	23.7883278311024	22.0442447137569	NA	17.9310881153376	24.4877199224428	21.7921648534513	22.8914002629809	21.413385089705	21.4563919846744	21.3334180571234	26.3126928306473	28.365154767778	21.7774528813633	21.162167894618	26.3780189930935	21.5836798299085	22.0103863437242	23.4984552896568	21.4071426164259	25.1075427113049	23.4560234055136	20.8492705387982	26.1379805838171	21.5435931543464	21.3340635838557	22.4558576099868	25.3122723199637	25.6961887835531	26.3329894618898	21.569857579502	27.1767795921445	21.5013917223979	19.9676614805039
2.65x64	5.42x43	24.6874642480754	22.4382539873315	24.0510162155365	26.3975118903278	20.4339971860623	20.8951700399877	24.6098278742457	24.2169835239652	24.9030438500999	22.7046621644102	24.3619827805538	24.8799019893568	23.2345787351525	25.3739146368864	24.757682888348	24.7474556874035	NA	20.8993885556492	26.4913561374272	24.6530357968344	22.9210180838461	22.6164996628568	23.7958774790929	22.1251252877809	24.1071975351761	29.2229192586915	23.256609146649	23.8031886309377	28.7086798895386	23.6873385588166	25.1853194738522	24.5099197469106	22.5433175020892	26.188637077939	23.8577361038301	22.6208772818386	27.0496917172821	23.0277453737877	22.9664343771514	23.7155264120365	27.259061796034	26.9318286976581	27.5368274679564	23.9209443375465	28.7267528272863	22.5330945500169	22.6178040932359
2.65x64	5.43x44	23.6844369576311	24.2439467702765	24.0232309858603	25.363639072499	22.7147871880852	21.3377401333881	23.7223987825852	25.0510713144169	26.006606006936	21.7538239856812	25.2320037056116	23.6823515302007	23.8565780236814	25.7341485967576	25.0704094501865	23.4791558195775	NA	21.609532988938	27.139679180123	25.4807480659419	24.8620854716574	22.8727547531993	23.1050106470436	22.1613943153404	25.2762975730228	29.283342380951	23.4858393292639	23.0190450279763	29.3413431355826	23.7013998109816	24.0949073457442	25.7495594913777	23.6045381653613	27.2329687511296	25.7545060523397	22.5046232139087	27.889992703477	24.1072180269728	22.7960983284421	23.3350477179713	26.707372109588	27.5520444976412	27.7895144613935	23.3091190309716	28.4315230861802	22.279160329779	21.8893188793073
2.65x64	5.47x47	25.0361446113414	26.2403380504139	25.4761881567867	26.7708173016813	25.5050744166725	23.0483185069974	24.6569917873207	26.6190960214655	27.3260193588455	22.7648440802919	26.5500179095985	25.061026674899	26.6359944999243	27.906073550394	26.3087448199263	24.6448199425356	NA	23.8728468767342	29.5011438591794	27.2882435125458	26.7323458379544	24.6015493211302	24.897798717959	23.1581331933297	26.7023184386675	29.7518048023981	24.6444553804705	24.5490541161976	31.1567679485533	25.0980119929846	25.0138560202141	26.8003177033408	25.0630017356262	28.2409270386084	27.2429182908146	24.6748504352103	28.5052256612713	25.4192080521798	24.2854757005087	24.3769707305891	27.5145344318235	28.4116663714045	29.0329563255277	24.6556275117872	29.6768999897226	23.2220682972038	23.7729656753212
2.65x64	6.51x51	17.4709018084356	18.007373212104	17.2457800635402	18.6866817011475	23.273613685889	14.7377121019512	16.9558967324055	17.4339945221971	18.6808874789181	15.0942377747271	17.9503150390181	16.9167128603639	20.3031557645603	17.8052031721067	17.1416261188955	16.7854499194987	NA	15.3099101891553	22.9029271055033	18.5922736102931	18.3085213493608	16.4293072282431	16.639754355158	13.8824487033088	18.4745262456172	21.7918811716657	14.7740746918377	16.5226474270923	23.419030573446	16.9713352450536	17.0363005960801	17.8888857394752	17.9545247221975	19.7633978100933	18.2826836651516	16.7600259546338	18.8413987272708	16.0186353039202	16.8555829919941	17.3214088341566	18.4184356284675	20.3170429196771	21.0653590047737	16.6776077720997	19.0405003610724	13.7138425322737	16.2291541985404
2.65x64	6.52x52	20.3885582864508	21.2085065480811	20.1388109380867	21.8312190452114	24.0212211180031	17.050552776963	19.9824956149126	20.4179915270822	21.5136172225872	18.1643471669091	20.7997304069067	20.2591177251133	22.0447222935559	20.8000622595222	20.1845989308681	20.0742762011486	NA	17.9346779731335	24.7880510327053	21.4671176686578	21.2137151390321	19.4963039061254	19.6445246570132	17.2958243804683	21.6763013911507	25.3247826446744	17.8478414381123	19.784956633766	26.115336662582	19.9652694948002	20.1383090898913	21.3487965468782	20.9120989381745	22.7787329542273	21.2897217219953	19.1630063664343	21.8803113780403	19.2404081817408	19.7241832784022	19.9680418168633	21.2177002759489	23.7687511451485	24.2827884313149	20.0212737107308	21.1977199009705	17.2587303704531	19.4113149992472
2.65x64	6.55x55	19.984288153447	19.7310887940833	17.5586304989882	21.1071312356748	20.9363881794353	14.4648984095983	18.5405554123926	18.1160097427662	19.4979045540797	16.8507035461431	18.3636322387484	19.9598235212639	19.9323788344492	18.3085725822632	17.9043384127982	19.9342149582069	NA	16.7305878258954	23.8203981914661	20.2440048162413	19.8925076850557	18.0284035066891	18.0345033200252	15.6292491502311	21.5624217795683	25.126844131327	14.9519866907378	19.2694949337029	24.656055199484	18.7671068361642	19.219471610843	19.6902742743721	20.6794925953225	21.1804708635101	20.1357542197952	17.0967284004865	20.7520936052245	17.5390743769448	18.0458644569885	18.5090593494105	19.883165266124	23.2218526608021	23.9890773895121	19.7201026873594	19.6365661203786	15.712314597156	18.4442574532021
2.65x64	6.58x58	21.67701310144	20.8548560532074	19.1048526296331	21.5191939904821	20.8772451247764	14.8677496952296	19.6601242620691	19.5745712085859	20.7490671115595	18.0861434805765	18.8558975920002	20.9328340412855	20.2062783559962	18.8053862496892	18.9593537864559	21.2358545389631	NA	18.0258157374361	25.5755743044022	21.5288523149749	20.883784594752	20.067553637651	20.1993094188886	16.9189481056004	23.2612984590285	25.6160739185379	16.3267830879203	20.1604219697902	25.51448316153	20.5657970426629	21.5060492885141	20.9152760679844	21.8897200301877	22.1369935402258	21.8597563344151	21.1658374509491	22.6985186080502	19.0800515984627	20.2513496340367	20.8574190877011	20.9828510455562	24.2152812496572	26.154368009952	20.961835177293	21.0744966487933	17.073637163768	19.9355097000303
2.65x64	6.59x59	24.4401826711668	23.8345289443698	26.2068301402516	24.3494059475791	21.2879046174113	17.8705733819595	20.3467561542375	21.3363034052293	22.4235217795956	20.6361154532533	20.4827123448043	24.0263540721434	22.2050112812401	21.5994553866527	21.3600032303368	24.671932575297	NA	20.2557573297075	26.9362081407165	23.7058648017743	22.8330801032187	22.4136027447619	21.9022421911548	18.6391022047737	25.8674934425429	28.1835838388236	18.5722130345309	23.4044607073096	28.3814813390704	22.6310585479336	24.0096463322557	23.1733111358735	25.0653187093242	25.1228570230378	23.6061945048328	24.0482002029258	24.7187201327253	22.0730713087237	22.1328264349585	23.1649403625392	22.5746759223693	26.9130891575085	28.5814441377618	24.0111698173996	23.7221170640396	19.2015452242782	22.4497921148504
2.65x64	7.32x31	12.0055835343393	14.1333164543924	12.0253469388621	11.4879082952468	21.5722214201505	9.4438747344509	11.3287400005473	11.2649734575808	12.9812366128963	10.0508008636128	12.6584885353663	10.3805785002571	18.4000954617089	12.8922002389041	11.6852554529201	11.0002234977295	NA	10.5262175542785	20.9577851406106	15.1947395502522	14.7775267551779	13.9370128076285	12.0208426909265	8.61812816103358	14.4843116163662	17.938870895349	6.921614479296	10.0887527970508	18.1194668795746	12.3865963444362	13.0333519096202	14.0408685272671	12.5140664454045	15.9154569522838	15.8477063640137	11.6835086339678	13.6333559331516	9.66965837038724	11.217449665588	11.3903266414972	15.3003377086913	15.8170322437555	16.3491691837842	10.6074608648819	15.2933790249245	7.31685164534583	11.6591342302934
2.65x64	7.35x34	12.9898595450451	13.8794781241947	12.3951030249853	12.9045551647471	21.8121831552919	9.14706395517163	12.1925246360219	12.0966310185936	14.0193013021334	9.85888335461983	13.662851752105	11.1516028444345	15.2141348094461	12.1714566917851	12.5092369471523	11.6193962838006	NA	10.7530167395015	20.0448713889613	15.1434184053667	14.6819959814734	12.2483454392828	11.923524017672	8.72728239488101	14.6750575126641	18.1453557143419	8.78424322295325	11.0068664478134	18.4479053011446	12.3582654122656	12.6349730905926	11.6537717070483	13.3389121370523	15.3145469733845	14.7516975633315	11.9805994006978	14.7849277644499	10.8232234107959	12.5212330862419	12.7356306871705	14.5194730965004	15.8768988785594	16.7789765182505	11.3196623624559	15.0304518228828	8.17605565049553	11.5242052220533
2.65x64	7.36x35	9.40275938222392	10.1589291758531	9.28815514512974	9.50509363446779	20.9389976359901	9.13391805305916	8.69275203833631	9.79116933772468	10.9924216167321	6.38874862551345	10.5827782269119	7.93269777566245	14.0377202565089	9.0041291638892	9.28791268262143	8.15942013871084	NA	9.07854162297007	16.6434611184092	13.0913202160821	11.2273311610551	8.78499664200277	8.57550196781506	6.16496196257528	11.0007969256777	14.8226221027185	7.54676374348634	7.99306480644315	14.7910686902604	8.76011974803998	8.93916668375749	8.60276577619082	9.87861371853359	11.5974295859039	11.1244154453167	10.807887767737	11.4732758181785	8.16871776963802	9.11753990942732	9.39393953567937	11.4413595783019	12.5397255552105	13.5450419342282	8.09063415314276	12.4599358746343	5.65491865547153	8.41894684625102
2.65x64	7.39x38	12.2909533397536	13.1823006338044	11.7322230630005	12.992023475964	20.5914352098148	10.298086229975	11.6823289202111	12.2143851666795	13.1550860506498	9.70188368307928	12.7757128176865	11.3451751859546	15.703131025372	12.4828594881141	12.0798096425399	11.2363414864448	NA	10.7141891900414	17.1713114525362	13.5398282485414	13.0728306422136	11.3972757271201	10.8160710519116	8.83499750990344	13.1993445670609	15.6019365785149	10.6168825933039	11.1239234984784	18.070479794405	11.9113140333046	12.0409940619535	12.5522764867573	12.3451380713218	13.9171851320589	12.7602304446276	12.0150970449681	13.253866190663	11.4503445363011	12.609572792129	13.0590279117551	12.6033048840374	13.9387715742816	14.6239645103508	11.2537994472978	14.3268666846593	8.59257086092399	11.1071950554584
2.65x64	7.40x39	11.0826312760102	11.2046409134787	11.0914892597883	12.1103685327904	22.9697984318539	12.1825797760573	10.4821459634943	12.8774768491347	12.7829281856701	9.22372348891704	12.4561291740251	10.6497298087792	17.344660561683	12.1810134635834	11.566657814598	10.0353932658367	NA	12.1873489323971	16.9873569456817	14.2616438743926	11.4062296575161	10.6891366349205	10.1406166479164	9.76557100225072	11.2093070258603	14.1938157660299	11.8518361446655	10.9545834699454	17.7634990077969	11.2533235090794	11.2809820494494	11.6348921352972	11.1270388244133	12.1279660702032	11.0784180278594	13.4468239372723	11.1502549746631	12.1116191320566	11.7619815082324	11.5279091339236	12.4513123404724	12.5762382690533	13.8920111574962	10.6203767353141	13.8214832778541	9.39314744907158	10.4251644111736
2.65x64	7.42x41	15.7427602090612	16.4666605600528	15.4181498565814	16.980382003948	23.9567205184683	14.1334275389942	15.1707093110375	16.6420286623957	16.8898186195116	14.0714521638671	16.7537347776548	15.6931052376513	20.3848548927874	16.8608399256977	16.2275548989982	15.1796951221031	NA	15.2710979631459	19.2586432284312	17.0369125430637	15.941428417805	15.2703078554429	14.7969529971545	13.6748407668974	10.1928711362403	18.0166346191513	15.3749450080317	15.5765779938984	21.1665227422928	15.9693251579395	16.024168777194	16.5620247554458	15.9765743825139	17.1139108914357	15.8334148559305	16.010258492604	16.0874417481463	16.4533233724983	16.0450010906824	16.1175016984643	16.3054337568799	17.070164410456	17.6978039880659	15.5568717292391	17.8187259084369	13.5379861870221	15.2422181128601
2.65x64	7.43x42	13.8200988057249	15.2876218228997	13.914925907097	15.1836340841052	22.9792630212546	14.1530448314135	13.347418739217	15.1363483376936	15.2470663407752	12.6575644181651	15.1843889900121	14.4475767172215	18.9258801908921	15.6365852410301	14.5258175673523	14.2035778591171	NA	14.4297214456829	17.6011976012998	15.1139300315967	13.3378462279335	13.5493200198386	13.251633257829	13.4603780407535	6.78038376495019	15.1162173178345	14.805414279918	14.2346698591854	19.7654872188874	14.4914786340111	14.2113856467271	15.1665151567524	14.0897554982335	14.5722670851175	13.26872360101	14.510254063937	13.9775838398487	15.730938338192	14.5361779708423	14.1213376491039	14.1524575957676	14.4801508970038	15.0346355459652	14.26861191567	15.6328371705203	13.2213513303293	14.0770522482514
3.28x28	3.29x29	3.80697543989976	3.85511621095914	3.8033398480809	3.8685157360414	3.84207131636049	3.8057624728824	3.80217161632665	3.79608653747514	3.81405991038421	3.89078976558744	3.81657569032766	3.80086529621874	3.85629290899952	3.83799452839631	3.8055819528687	3.80815926662738	3.81096588806565	3.787894929905	3.81958701956115	3.83563306378491	3.80585272967833	3.86189008129439	3.77659449769233	3.83303652474119	3.78287655098603	3.8106927191785	3.90793526046684	3.81126396356904	3.85398313436891	3.80609957830848	3.81497693308885	3.83107308726941	3.8085812319025	3.7993481019775	3.85132717384541	3.79555081641651	3.83749671009631	3.84654338335082	3.84242813856031	3.80650508997427	3.88267227563697	3.86314936289034	3.80475294861571	3.81810122966901	3.81223949929697	3.92175700420105	3.81079978482208
3.28x28	3.32x32	6.26793913499485	6.01651527048673	6.36631675303703	6.0710955354038	7.40020391610934	6.22876954141025	6.10533094926065	5.80115617786662	6.23783969014914	6.05175222559549	6.03641913720378	5.89296419469862	6.60522164654601	6.85472253267775	6.26938768939998	6.01448235511586	6.04981636084931	7.98010908446745	6.86044007334806	8.52442672559275	6.04098551562574	6.72493940493146	6.0481892331507	6.18529433414449	6.04588951271854	6.17927876050272	6.24667983812201	6.04563875864247	6.37232171190375	6.19006720480481	5.98445728533507	8.03399041572742	5.91546963477964	7.30994863183046	6.04851998426062	7.25317564932768	6.45995301840501	6.01118474179591	6.05735041086448	5.98438568275809	6.45459758621713	6.3544005224726	6.48125157666326	5.98917206298166	6.15039015022625	6.16049243161616	6.07302634606503
3.28x28	3.33x33	8.89025922006777	8.65241619433555	8.92322279224272	8.5845941662958	9.55692068607875	8.84929025402603	8.61716740002189	8.45233494367089	8.92648872737763	8.74021681653264	8.76693538244694	8.44378955209093	8.96076704306054	9.10941721516805	8.91999024663144	8.64328855239717	8.69092388644613	10.0919878121211	9.12556946168293	10.0855684024253	8.67369938376931	9.41870622750279	8.66373556844852	8.64978450598626	8.32783609348791	8.57760531850236	8.67035068494926	8.68831537180828	8.7912350099403	8.61652888348899	8.57435280356482	9.88001826921388	8.51179011724326	9.51440271378081	8.66885119263216	9.67307975776071	8.72114935085967	8.73992128111003	8.76403913729281	8.64344838591635	8.83255183964408	8.90357085668441	8.77686806326721	8.62583248156374	8.74682971138687	8.74118058387996	8.62686507371015
3.28x28	3.36x36	12.6543500030622	12.3315198171191	12.6770638161997	12.1138897964279	13.4639293298799	12.3956418954405	12.6553790144744	11.9763333704436	12.5071244896659	11.9573218573391	12.4041158894941	11.7526078808067	12.9451194664244	13.2926518798921	12.8289800841688	11.9818034118408	11.9272665770494	14.0860593140878	13.1140834982853	14.1681990739826	12.0683703125153	12.7065492955405	12.2365699850898	12.4804186227867	12.5913046980843	12.0699246476521	12.589017793299	12.06079354769	12.6580705085728	12.3902119836587	11.9949591912603	13.7889624337729	12.0972088516319	13.3590525861679	11.9923448916382	13.231611164178	12.5489525060859	12.4277827467332	12.2528664809505	12.6597068686443	12.8940368387871	12.5169624510102	12.639651340128	12.1134660192696	12.4810793203152	12.5695316141852	12.0401264528243
3.28x28	3.37x37	14.3302461248926	14.3641414988853	14.3264212558475	14.101092085367	15.1897409457831	14.476457646814	14.2904564307793	14.0913563222282	14.4893459479716	14.0825662789138	14.4017963462896	13.8842181270679	15.0464408416077	14.8200625504753	14.6369692901229	14.0667608211699	14.2237088693491	15.6006779660372	14.5497398945823	15.8333443087681	14.2890734829099	14.8179888648899	14.0887449050652	14.3487466003132	14.421281843165	13.9748305893131	14.7621156681554	14.1735008378311	14.3715101850849	14.1575598533081	14.0197976090955	15.3865221541452	13.9524549094416	15.290218409166	14.1535065266527	15.1904524619907	14.3759381259103	14.3390622426991	14.0834963343624	14.287215333997	14.7461912709689	14.4417788724243	14.2705532128225	14.0637893542246	14.0495284618381	14.3239906799746	14.1123888126709
3.28x28	3.40x40	19.0388081559745	18.5890463445546	19.0443888324094	18.5810648241698	19.6836223546379	18.5917013745381	18.9008009089562	18.147414306176	18.8906571881446	18.1924842998421	18.627347342013	18.4360577944418	18.8210663353594	19.0629564338798	18.8757603290569	18.2699685823485	18.0695780249568	20.0968320637856	19.0689015415152	20.6639161825633	18.6408449647541	18.73670493977	18.6349986316071	18.5804677551455	18.4571488047315	18.2214511771154	18.7859742893468	18.4069163359863	19.4181279221247	18.5534519968657	18.7686303442739	19.4865768671668	18.4555511703119	19.5046392942807	18.455477317046	19.2228158707303	18.6159123601289	18.6310902794227	18.6535222679257	18.7325569797612	18.6597303839043	19.1493799638526	19.194240828957	18.314694919654	18.3588430191012	18.6846110743574	18.6067137614357
3.28x28	4.57x57	11.3568311601432	10.7099729224681	10.7164413402958	11.6252320837048	11.1263224831927	10.828561169426	11.5720237210265	9.90757962370225	10.9081258243568	10.901615339022	11.1174706655786	11.9306372839006	10.3894300613653	10.5497975809965	10.6007887442397	12.3127723117095	10.7753296933319	11.1316860807337	10.064457461781	11.4206310245975	11.2378623412106	11.48454735721	10.8070956320373	11.7084716338214	11.5313158832806	10.8525467057276	11.2227997843675	11.9354975179085	10.6041895965698	11.5399543326653	10.3448987428587	11.9372252219685	10.9049858780285	11.836213625987	10.9820419777016	10.8281943554777	11.3878490067264	10.6751969536866	12.7250579173535	12.0414044446651	11.5135793305123	12.119322134509	12.910555836214	11.7952324690953	10.3608947972653	11.6826507694102	11.9584986097754
3.28x28	4.60x61	10.3120989618991	9.28901205726422	9.69911614529902	10.2100825168066	10.6351999040921	8.95335361749998	10.7716736861084	8.75164978732581	8.66169053938087	13.4910363575227	9.17036504180722	9.77024841035273	11.3327170175558	8.68471012757479	8.54534241560863	10.1100918393455	9.05531854768235	10.6972157125114	10.7799800092579	10.2638767529623	10.8493278593653	9.87408026096608	9.23472343928068	10.5132541584421	9.79800403143416	10.6767592461383	8.81902188454026	9.88012758014794	9.98177464181595	10.1993045841371	9.68952599459849	12.1740951203775	9.96533481625179	10.8649315690436	10.4361127820659	9.25855393676572	11.7974802818229	8.85129984804492	12.4383970832258	15.1914884721676	10.3392255512683	12.5717941440353	12.8357103815878	9.99725132223853	9.1447966625836	10.5710880234723	9.98442692396514
3.28x28	5.38x39	18.0683968021515	17.1823415459011	16.0581928310754	19.8941923183627	16.3526248963278	16.1539199577069	17.914690591802	17.6265167857975	17.2651158698689	19.0700561614275	18.1755553972912	20.5314961461653	16.9569368106389	22.0517746451391	19.1984358477455	20.7536211298173	22.6712934346499	16.2021927836944	15.9244341500726	16.5391107378843	17.723131156768	18.1809654859141	15.7744776775651	19.0219901692751	17.9140681030301	17.5745473341421	17.6425536416926	20.0592844837497	16.6609996398776	15.3192737425767	16.3489619853983	19.131122314177	13.7317800739744	18.2129450940807	17.7410584238934	16.9609976711277	18.7397667274702	16.3907059945568	17.9501561274547	18.4450567903707	18.8847429159097	18.9511480918703	19.3355394545898	21.0219711254678	18.6000837363707	19.0417080378836	20.1380723506497
3.28x28	5.39x40	17.9914996317706	17.7619527361155	16.0975395946089	18.1718752747205	15.680948345046	15.7169531398423	17.5460503247882	17.4703150801581	17.9921623492008	17.8509359418491	18.2560089833457	18.2879513341435	16.1894647533512	19.5746855147152	19.4650765474991	18.390747836888	21.8139103784718	15.2175531870271	15.0195272229188	15.7652221360817	19.2904922954289	17.952004846256	15.2796052959492	18.4547252214711	20.7599311174194	16.4120236716866	16.6528954839691	17.8301144415845	16.3303082947016	15.7000314012425	15.8008702924871	19.6181128042429	15.415358510265	19.0944290566647	19.5840691890118	15.8353166056129	18.212753031873	17.3064922500199	17.6702042150056	17.7021328658442	17.9222873819164	18.8403816840318	18.545909468128	19.1217472266527	16.6330878071391	18.3715917655493	18.1994927951303
3.28x28	5.42x43	17.0916150787455	16.3536978081411	16.0230656866905	18.1671272907964	16.9563228619887	15.4602158458412	16.7196614200169	17.1591848582618	17.2059310704187	16.7958117993743	17.8448718123723	18.8659384871254	16.7637486261278	18.7085927316835	17.8211700513743	18.8605751237867	18.8135605880439	16.4394180553936	15.724262939801	17.2774701273074	17.4260841556559	16.9544909094906	15.7911398575277	17.2605349279795	16.5476979970025	16.4934134126323	16.4050563851515	18.2000256593226	16.7812262364822	15.5263234862604	16.9616475614841	18.4397079423726	14.0515445770207	18.056948247143	17.9494042798083	15.9732151115547	18.0510152069073	16.579522399635	16.4375703800775	16.2931882085735	18.127167318696	18.3994561060918	18.3216581400265	19.1082274688156	16.5952915310337	17.4169965837971	18.368104447656
3.28x28	5.43x44	17.9733230372127	19.5850338013494	18.1579391451783	19.1836554650046	18.874254978674	17.7542912277567	17.7714406281539	19.8280641011673	20.1008314504649	18.1712309434446	20.4969504561044	19.4775315171097	18.366458177885	20.8232618482312	19.8818828585222	19.2501990898796	20.2640338037618	18.819362529055	17.4182326026494	19.6702140811939	20.8767797085662	19.0969865947484	17.4910427933843	19.3865696553052	19.2967925573138	18.1712886444523	18.505046365789	19.1975922709073	19.025087384819	17.6041193474709	17.8417491575238	21.200884533434	17.1359854400032	20.7500188674613	21.3356521812669	17.339920818735	19.9971948282753	19.7315634200638	18.2752460722147	17.8472413834744	19.5283110380801	20.856062859514	20.3977916942006	20.1279434866059	17.6824637423635	19.4147427229928	19.401694204373
3.28x28	5.46x461	17.3128226179326	17.7060786737211	16.9715748532657	18.3863937464637	21.4819277533465	16.7742964383011	16.7478353228111	17.9790261415906	18.3790623808724	17.3463627599563	18.6209782234984	19.0220821678385	20.7969146509765	19.9026065378382	17.888697353357	18.7457619210316	16.6653095380794	19.6051757706989	20.2451370210231	20.5939686801743	19.4254150277414	17.8633969333943	17.2621787153302	17.520648561055	17.5588481968494	20.0542063916775	17.7914120856103	18.6252988700853	20.6547051540321	16.9577777435606	17.0998800580589	18.9868432605318	15.9840436060466	19.2350038731475	19.4966871544886	17.2328189510596	19.1770036502056	17.9014524829691	16.8021514693803	16.8595419570046	18.8040455753543	19.6973075825099	19.64647001372	19.3526377013574	17.189503221443	18.0083092765534	18.628688091221
3.28x28	5.47x47	18.9585613905697	21.0431332505404	19.7067660969526	20.0925021089958	20.331671131513	19.0949558522663	18.5206349243216	20.691192836567	21.0132589333497	19.6180229890782	21.050296197441	20.3768408248188	19.4362460881725	22.7903864600844	20.2912073076	20.0801551039826	18.4299291371399	20.0539564674904	19.0980329877189	21.0502131580656	22.9226711576116	20.4337384734169	19.5209377336234	20.2506199905089	20.363842810236	18.5314934908118	19.38294366189	19.9523908091236	19.8244443553912	18.970183842019	18.8457134648705	21.7017366586179	18.2585516676433	21.6149663890555	23.0352283904458	19.5781024106015	20.4806838264742	20.5447258925496	19.3064118364858	18.8849117286791	20.156696505132	21.387972741707	21.1899446200315	20.656588222647	18.9466041812247	20.2325425490718	20.0963603172316
3.28x28	6.48x48	18.7409562456135	19.8195444195874	18.8282416066929	19.1274802574725	19.1118038395124	17.6617311722266	18.5285074952086	18.2876153994992	18.800690359665	19.2354051685947	18.6229908983493	19.1538673640599	18.3038972079719	19.9811554720942	18.1279105800972	19.0013731345921	15.3678535261109	18.4238124719071	17.7185091077099	19.5094585009426	19.8802862152435	19.0671364918805	18.806414092006	18.5259423242112	18.2473050338947	17.0272809338426	16.937460907704	18.9583551501706	20.5066073742099	18.5883574583662	19.4478469245313	18.3432678658957	18.8187759697596	18.6888808118624	19.0933595262856	17.9098228634456	16.7180929833519	18.9855520857309	18.8370796834329	18.834136189377	17.9036133224553	19.2004843168083	19.1320455257664	19.214689875197	16.0164717088378	18.2079945353683	19.3142324724541
3.28x28	6.51x51	18.4981002538098	19.892101548102	18.0547598987082	18.9981219334965	18.0077521639987	16.1275172608805	17.9078700576032	17.5044820260412	18.4712219411711	18.1053664972571	18.1314170709297	18.8171298023902	17.2823638718782	19.584141390421	17.4975872622485	18.7104260774575	14.2270760875171	17.4128628892552	17.7474089094718	17.9909404423449	19.8353647054951	18.405930267172	17.6039939218349	17.0732707177037	17.508481373323	15.04228177505	15.7542054385488	18.4408093911303	19.3576859670778	17.7055801655862	18.6503272089259	17.609837307596	18.469085223692	18.3946521848063	19.3664953463449	16.5080655438486	15.5412403623392	17.475040572199	18.3533819771725	18.4688172063075	17.9502829504161	18.7355587319941	18.9178480805825	18.8243187924557	15.3113586921605	16.7986171157033	19.1543149446802
3.28x28	6.52x52	19.05960943986	21.5443667347175	18.6124683747213	19.9806348497739	19.2929915254219	16.9031908526171	18.5854300192382	18.4424789548477	19.0974456145318	18.934384331158	18.9055907604074	20.1651517970979	17.8980997315357	20.8884361789005	18.3347100331584	19.9957903069621	14.8715967199222	18.402414732855	17.8724436773487	19.090179176739	20.649744090424	19.6298647218976	18.2734193297259	18.3097561425596	18.8699210915149	16.8198690244603	16.889784072036	19.8384528126565	19.9351950078247	18.4016787005969	19.4940080537585	19.7362107051987	19.2251085042452	19.6435781618319	20.0807451305971	17.5319664898151	17.0002494687578	18.8580347067238	18.9675020495583	18.7148760882887	18.6715807043753	20.3249713652935	20.0384359170071	20.4664864107154	14.7365399602485	18.0571710962709	20.5522529421959
3.28x28	6.55x55	19.2540209307043	21.1204211368997	17.4917570872683	20.1948886850114	17.9901820446598	15.604393387761	18.1184826351436	18.0813710486788	19.1483932746327	18.1912881896802	18.4203415277785	20.5407655894321	17.4880913481146	19.6886280375246	17.3245535007399	20.4580699725072	14.1611908397564	18.4930578596402	17.7872532730605	18.3829957025508	20.6878522084822	19.9280834502468	17.3045168958859	17.6463992361048	18.9568470215909	16.5081097040212	15.4129801790569	20.1559461698031	19.103903553986	18.1832887564379	19.5747695261017	19.2746494131541	19.6948221367952	18.7420188346933	20.4934911130339	16.8460306303889	16.6787242018087	18.5621593032707	18.5901129636159	18.6315909411945	18.9673290159685	20.1277763053945	20.0870853037468	21.0470614813565	15.248158905258	17.3780077684411	20.8432668744609
3.28x28	6.58x58	22.8568065135968	23.7810425549428	20.8113021457092	22.6933580150669	20.0436192839517	18.0150157923883	21.2635399686882	22.1177761088225	22.8166860652462	21.2689705439638	21.6260200915471	23.5707890618876	20.142802486248	21.8524038494624	19.9213973907455	23.4106022776006	17.0143251115053	21.1967747310764	20.8287909874769	21.2321139314954	23.5773508690014	23.5389878711894	20.4457775102831	20.869795782422	22.3991197594905	18.9408788866832	18.2873697944784	22.873238970465	21.3152586191207	21.4370835936235	23.0683319943164	22.606597488344	22.4730998751841	21.1604119761407	24.0550911243337	22.2581973439001	20.0269603534835	22.3319235848594	22.1035469099419	22.2185531932212	22.3734083456232	22.6434616169878	23.3964307961706	24.145102629726	18.6777914647316	20.6105964493995	24.2114244521052
3.28x28	6.59x59	23.6067772895836	24.9049130895894	29.9484641843284	23.3073741549751	21.0961363524224	19.4148545706632	18.8973069509917	21.7042348171964	22.4297242069536	21.9961277728604	21.3632778851936	24.7645506722815	21.5342222752529	22.6041824669684	19.9393147826098	25.3473494077783	17.132325965846	21.6498596069351	20.8729100989776	21.5487379212797	23.3459355349063	23.8469187317775	19.5358757674183	19.907380792058	23.0856924739112	19.600186325645	17.9006039283595	24.4799698937723	22.4490452803677	21.1708718290013	23.6015876160906	22.8818407039294	23.7987960409765	22.2458168876758	23.648327150139	23.7205211789286	20.3449878594213	22.9760258748113	21.5877627835772	22.3275695273803	21.7947814396015	23.2318317400932	23.7636002533286	25.4573960373012	19.722521872215	19.9703646686784	24.9398905570975
3.28x28	7.32x31	19.6603311518397	21.0968994404391	20.330789556729	19.7090661625557	19.818652956243	18.7248210405333	18.7714979157232	20.6882234375018	22.1511932184251	19.3018710492014	21.5447328365891	19.3649907306975	20.8442485592549	20.676359181442	21.0046871197835	19.5257178101088	17.7714501377912	19.3842708916276	20.6031536178324	21.8095953653432	22.3881188580014	22.2422080513604	20.0635016883893	20.3461731536916	18.8619707082797	22.7539969455918	17.1656126310715	19.3867562010771	20.1469795502949	18.4382732922581	19.0771378094304	19.6706906335289	20.4896540234334	21.1054532763454	22.1375388198417	19.348234079626	17.5437090149147	19.2069600666009	20.1956501504656	20.3881477334259	22.1061977508571	22.7436748789636	22.3091745477057	19.3030379733347	19.3933931791216	19.5209910096798	21.7340828653983
3.28x28	7.35x34	18.4421912472461	18.9650234642618	18.515806922735	18.4979533462489	18.0541331555963	16.2649830617803	17.65413087637	18.0820053091464	19.9056624607171	17.2056045229454	19.3575124693231	17.4408816864286	16.5008997027435	17.9974456520919	18.8389778119727	17.7698103816557	14.831838490221	17.3766621363253	18.2692836750651	19.2702958202514	20.2600063919042	19.2341092073431	17.7400228297486	17.640753356929	17.773009565068	15.7787874692576	15.4370795489302	17.4694259779765	18.8581115438423	16.5604857718607	17.8180327196916	16.0028367485268	18.7042594614168	17.9932464274794	19.2637138942624	17.130060887224	15.2157592317965	16.8288608348872	18.6903619547616	18.9789349016219	18.8002386686978	19.7561882457118	19.7802164548318	17.432112350487	16.4050214568589	17.204161473318	18.8680157144306
3.28x28	7.36x35	15.9853887347165	16.6544281198725	17.3156249959394	16.4737646881337	16.084167246084	17.2112011783025	15.5443351739468	17.0938481624238	17.8054117054338	15.6249829759907	17.2436644017448	15.793981828532	15.7069213724396	15.9916688309882	17.0176896786844	15.8064490003289	14.2040256617622	16.4502422474564	16.5892214103013	18.6306678624251	18.5793354563612	17.322438252163	16.6718855862197	16.8688187197563	16.1546496402738	15.1912009400179	15.2263490371133	15.9167893119184	16.9300707027466	15.5670093145729	16.4418013003442	13.9603504254012	16.9754206428	16.2637116612414	17.8773237650382	16.6919405702273	13.8299931308732	16.3335896238396	16.5017039726205	16.7109988031835	18.1454675883539	18.3856409461297	18.2847911937763	15.7194113757481	16.516247788163	16.5951449225368	17.0930543496474
3.28x28	7.39x38	14.7261452186239	15.4946228737585	15.0131220270802	14.3176081102955	14.1268267491323	14.0248411399203	14.2958259992209	14.6757627740435	15.1786681233895	13.9877177909765	14.7215403066391	14.1468508156409	13.6747052984699	14.7761005343088	14.6753674229983	13.8663127398743	11.4017769229186	14.4973056807118	14.5314992344218	15.7626193572008	16.3333097074659	14.9889223428504	14.4883589823002	13.9650387754564	13.898370731852	12.2534502488075	13.1814459753094	13.9006742642219	16.4414362207199	13.8854586168409	14.8152951033721	13.0065042959282	14.9132890067885	14.2019181098892	15.6442130195162	14.1169818658239	11.5622434241803	14.0032668331358	14.9092182893672	15.3472518386843	14.9999732333095	15.1122719999344	15.3276928466094	13.8502198177502	13.607660857032	13.6246878863334	14.7354308725602
3.28x28	7.40x39	15.3179493732027	15.1455421164117	16.5409555044441	15.2537884474645	15.7149329619951	16.7007580965656	15.1743282553133	16.5673624334111	16.0747647572212	14.994026577274	15.377413599172	14.8759060564391	15.6250287359736	15.5038950912343	15.3903379105204	14.2033575255994	12.8685569509561	16.5110300708345	15.747234582618	17.7140239923062	16.5720025947379	15.7305649930319	16.0512655264312	15.9096187257898	14.1161347400767	14.3518280368739	15.1779521016506	15.0336889019296	17.8790646287774	15.3442405155811	15.7002870355927	13.8384844545926	15.7671968339334	14.4605189740894	16.1666379312459	16.0127281248387	11.5361078358344	16.4983967099837	15.6568596148781	16.0529495109154	16.2186385988467	15.8590253483624	16.948540586139	14.5566448400722	15.6070458767827	15.6277372962307	14.9316386240761
3.28x28	7.42x41	15.9862476522791	17.1959823796141	16.3117462584482	15.9654497274584	16.2792373900008	14.6154625995895	15.7609323645525	15.1642375344097	15.7629757977357	16.0189980960109	15.3034848972383	15.7395416705824	15.875214833192	16.3695432129305	15.6261170480705	15.4279838280963	12.5460623703216	15.9966032957	14.4572039482052	16.5109911574078	16.7703121318597	16.1107219887875	16.0093244392135	15.0815262158709	13.9347747021615	13.7361698082107	14.8630375764848	15.4481145451476	16.9232103928303	16.1682069816044	16.747104406434	15.0642069489237	16.3442640091257	15.2253572043483	16.3023249875593	15.1791592323159	13.1636203226924	15.9579644065275	16.1389855938965	16.3582463607809	18.1693500984488	15.8112032116471	15.653594283742	15.6471723643603	14.3793298174845	14.6348795690296	15.5798897942187
3.28x28	7.43x42	13.6826514243402	14.6144575335522	14.7970615326152	14.2245993265188	14.5435389434621	14.8464571868173	13.7515948529616	14.1271107095542	13.6318156164174	14.1336628302786	13.199215203943	14.1617913061872	14.3823751167879	13.9542915979279	13.5578619995927	13.8744675213141	10.2235495792802	15.1865904995163	14.4132745758901	15.1973873083501	14.1006176105871	13.394116021597	14.4139305881498	14.266149375357	11.8369014526607	12.9744452675249	13.7911833429913	13.82377115696	17.2372416006738	14.7693889514766	14.4920760762563	12.9600367669232	14.3393415818161	12.9192391416832	13.484860918823	13.3771536957605	10.8912208682039	15.0090908785309	14.1636758646899	14.3673462406946	13.6256804967678	13.5954667444704	13.6487523239306	13.7385370764139	13.3594171654305	14.1668867786822	13.8398027803867
3.29x29	3.32x32	5.16136290140502	4.83159569914537	5.09995499980147	5.62394976862347	5.30958887297312	4.83140704143214	5.05851766825026	4.77692516164949	4.87331437524812	5.01344731696664	5.02593533583551	4.95152764306128	5.39935829520509	5.6263811637677	5.16494937051662	5.08791361954977	5.19195117465486	7.1386918269386	5.20464263902912	6.70121406910718	5.05239477871633	5.27302882601641	4.79083844436441	4.98924733802605	4.80987349105982	5.2761085091192	5.12788582166179	5.09366400540907	5.14524887639072	5.11588252406171	4.93323423323888	6.48596122405924	4.92599167680986	5.5770014344628	5.04947630948002	6.89554936172601	5.49735827466248	4.74092585894359	5.16512768477218	4.99609297351441	5.43051323541339	5.15444827309383	5.40545511497413	4.96197309545306	5.1522760989683	5.04521565445918	5.23743085873217
3.29x29	3.33x33	6.47715531695821	6.0846675340564	6.38508112712751	6.54098746367855	6.78264262658737	6.16689046440749	6.13969062738506	6.13992516241037	6.37914116476505	6.30112347125495	6.430114617952	5.9574582667443	6.41836560192702	6.65230952376692	6.4959157937892	6.15744930957617	6.33729350748409	8.31770605395503	6.33387377518687	7.39222043773047	6.35343733737888	6.96510732149906	6.08647073434186	6.08034086215567	5.63397807947458	6.15424747633697	5.90646789545156	6.23561809285976	6.29890030084617	6.05963744790066	6.24214602520639	7.92114423552557	5.9973360752921	6.92294742143833	6.32957739505569	7.82147057783893	6.06881281635873	6.1078238350496	6.39345665504975	6.12415683992498	6.28974180710146	6.47368681664475	6.4590551940667	6.07371410258995	6.63312008032419	6.26660019468292	6.14588854438478
3.29x29	3.36x36	11.1422149503588	10.5597761339907	10.9762332792265	11.3028162862182	10.9863087977719	10.4802325355881	11.0291770771894	10.5573446472113	10.7054366562042	10.7557431635383	10.8723894797786	10.2242555230198	11.1144648544138	11.505958369471	11.1891822757519	10.5546873947076	10.4450306366233	12.7277468155208	10.8936988667762	11.9091165919223	10.4315113478345	10.8743772235471	10.580955202627	10.5571894934211	10.5197504247962	10.7235562198368	10.5459328179161	10.5434112126958	10.9299117562769	10.647724874357	10.6014023129018	12.2583675911599	10.6103161592857	11.2482860916675	10.3982460540228	12.462861228466	10.7474561641348	10.439736011988	10.9352767226074	10.9810020034603	11.1365941831423	10.7614775007896	10.8714291148864	10.5533248789185	10.8693450124651	10.7960008799555	10.4999993333333
3.29x29	3.37x37	12.4637906753925	12.2991968843498	12.2840012211006	12.6597218768818	12.788324597069	12.2779345982946	12.3591121849427	12.3437617442982	12.5329800526451	12.2704316142506	12.5905744110426	11.6677456262982	12.9954858701012	12.9907919696992	12.7334095198419	12.0111570217028	12.3245177998979	14.2644917540023	12.2369727465579	13.4574568548445	12.3338056576225	12.9093025760496	12.0468985635308	12.29325774561	12.1464036241185	12.0425041000616	12.4087982093352	12.1615857929795	12.3220310419995	11.9915482319841	12.1566415592465	14.24320262441	11.921816178754	13.1481929176598	12.1815996486504	13.780073294435	11.9462677853797	12.2127958306032	12.2873009648173	12.1639344375083	12.589388587219	12.2761902070634	12.1581507639937	11.9234257661127	12.3257060649685	12.4791238875171	12.0131536658781
3.29x29	3.40x40	17.4246970131478	17.0499803225693	17.1613184808161	17.5004079381025	17.1578976859055	16.5620033812338	17.1752017164283	16.9558830203561	17.3889430961171	16.7058106657534	17.3075607466795	16.4885554855482	16.8327346857247	17.5264888097987	17.3550214635419	16.4822313113243	16.5136128996655	18.6760966746266	16.8337262957433	18.2617076145688	17.0169037724258	17.1414051641048	16.7968658386022	16.6411975831068	16.4298916916698	16.6024277742745	16.7061033757127	16.603691938843	17.4080146484313	16.5124417031522	17.0597069728645	18.3654040794097	16.5045354372669	17.479300272036	16.8329837521457	18.2836436193665	16.3713794776128	16.5132034747956	17.0627348628524	16.848826962136	16.9082834729017	17.2753244253183	17.3779379674345	16.3789656266811	16.7660762553437	16.9404757017033	16.7482264732717
3.29x29	4.57x57	9.10089621960387	7.95320369410969	8.43426161557726	9.04740918716513	9.17245288894961	8.30111829815719	9.27371910292737	7.79558253115186	8.67522414696012	8.21300517472137	8.83856447620314	9.09377385907523	8.35659296603586	8.20795437365486	8.27588098029449	9.53779833085183	8.25537019157833	9.76647014022979	8.17891563717343	9.30917923342332	8.63963268895154	8.98978859595708	8.53784715253207	9.30780000859494	8.77389976008388	8.35556754505641	8.40349814065547	9.33991787972464	8.43538612038595	9.26225059043427	8.3719871595697	10.9672062531896	8.69604749297058	9.54265251384538	8.15555669467143	8.18083840446687	8.34845506665754	8.17165356583354	10.1432295152974	9.33253481107893	8.56346571196498	9.44381564834892	10.4305565048084	9.14594828325636	8.49178102638075	9.43578512896516	9.14731599978923
3.29x29	4.60x61	7.74951372667989	5.97022528888149	7.3163669946224	7.06332846468292	10.3051453653017	6.05585543090322	8.27567344691657	7.01266490002196	6.95298310079925	11.2012299771052	7.22344135436843	7.03802195222493	9.55158353363462	5.63964945719147	6.38359029073765	7.16371090985671	6.0546115482333	10.1840347603492	10.4342110386938	9.53552394994633	7.33652451778089	6.71706945028856	6.85236025030792	7.45645358062397	6.59967059784047	8.72204947245772	5.99830384358779	7.17973495332523	9.32914202914716	7.63223152164556	7.29932017382441	10.1336864466985	7.47716931732859	7.79476067624914	6.7813881322337	5.78257217853785	9.71694643393695	6.01983895133416	9.76127102379603	12.9198546818453	6.87614870403484	9.39600909961245	9.89450069483044	7.25173889491341	6.42876395584719	7.45593656088891	7.25876394436408
3.29x29	5.38x39	14.3785078850345	13.3346661000567	12.4248915890643	16.07611240319	13.1738143679042	12.4562836351779	14.2256296169976	13.8875612329883	13.484146357853	15.3708706649949	14.4322930264044	16.7590927260398	13.2280053296028	18.3890200663331	15.4109423787126	16.9495275745373	19.061651790965	12.9842176121629	12.636058483562	13.0889599663228	13.9564786747947	14.412640458986	12.1670685869687	15.3420531546465	14.1913876347593	13.8183571020581	13.8469578247354	16.2570212216138	13.213872293919	11.6740468561677	12.6903335259559	16.2052455087851	10.0199626246808	14.5307663596935	13.9110311264119	13.2327673598533	14.9740872843723	12.5820597280414	14.147919599715	14.7053001669466	15.2114118674106	15.1516144684321	15.7111752902194	17.2138012943103	15.4004641813161	15.2995034233141	16.3826785660954
3.29x29	5.39x40	14.1933845505573	14.0829761059231	12.2959419728624	14.4943038811804	12.0538123844699	11.9294799551364	13.7449008363102	13.9396660648668	14.2675300244997	13.9870072209891	14.6875839401857	14.5381058257257	12.3363857754206	15.7983157013651	15.8142088325657	14.637663850492	18.0523935532106	11.692938253493	11.3351857946837	12.0093337866844	15.5649497911172	14.1275669879849	11.5039858310066	14.6314906280939	16.9890690445357	12.6201130739784	12.7543278145106	14.0777115327741	12.5530450887424	11.915466419742	11.9928883510187	16.2898740019682	11.6786114328716	15.3234649802191	15.8255573993462	12.3014616204742	14.413816080414	13.5100573647931	13.8641025313577	13.9007187224258	14.0654551650489	14.9932765264968	14.7764492013474	15.3416353756697	13.1289088655532	14.4801120852015	14.5852680811838
3.29x29	5.42x43	13.6325477442773	12.9130813131491	12.5168522400802	14.8030887317478	13.4736540329637	11.8138060759435	13.198536926493	13.9623822465939	13.8382827330561	13.3003152218284	14.6405500579725	15.1625151607509	13.076371476828	15.3576940326339	14.378348097052	15.1974519245826	15.0975775871495	13.493815249958	12.2883454541285	13.8078627238251	14.0679807364099	13.4807228663748	12.3112892907282	13.6371558251712	12.9022879366413	13.0022807614664	12.6571510617516	14.543579648766	13.286144060637	11.8656786995098	13.4553293902453	15.6097875065614	10.4098104689759	14.6258332412208	14.4926032513141	12.8430267849911	14.290432148819	12.8936025609602	12.9330099358193	12.6761904766377	14.6437556316677	14.8172261236711	14.8386993365322	15.4167448574594	13.5576871552636	13.8364366800127	14.7306266669141
3.29x29	5.43x44	14.5386844315433	16.326854136667	14.6184967079382	16.0740988238843	15.1475537629018	14.1726479177322	14.2747693851775	16.8404844645277	16.7772364232015	14.6978995438124	17.4647865718422	15.9420067431927	14.7172376823914	17.5162458877466	16.6548216441966	15.7893638250564	16.5298934963296	15.6401109331104	13.7735904541989	16.0206805411006	17.5780748661507	15.7579203577122	13.9746447539821	15.7922605728249	15.7376477276625	14.7776654448529	14.8132733384624	15.7439653836002	15.3780146963124	13.9640600829415	14.3456598314612	18.1594129310394	13.5459337810282	17.320436282034	17.9772670614863	14.5160157756872	16.3331985232532	16.1236641927324	14.9053267324135	14.3243424281885	15.9441729794932	17.3426455017682	16.9091192851668	16.6007702833332	14.4768500026767	15.8625447201891	16.0521752108554
3.29x29	5.46x461	14.5304169589176	14.9455728227459	14.0286942015285	15.8184243526339	18.1428550123733	13.7343559368468	13.8911897618599	15.5385855212114	15.6783824101851	14.581578172475	16.134969848128	15.8152624069283	17.3609792350547	17.1834978103994	15.1620020775622	15.6596666950481	13.1928114137965	17.1765428710204	17.0168487094409	17.4425505302407	16.7126583762129	15.1279484729424	14.3564264355723	14.5052560473781	14.4294324559215	16.9599233783647	14.5832959923332	15.5377128625805	17.4513785415365	13.8511252250494	14.2243241315712	16.6465196963209	12.9123894380552	16.4433270964242	16.70159097212	15.1185715264373	15.7760470967857	14.7290085545498	14.083423376438	13.9238301483464	15.8261182227355	16.667446865072	16.7045360606034	16.1533377665422	14.7922878893023	15.1203327013661	15.4700723657002
3.29x29	5.47x47	16.1865097534953	18.3669192299634	16.7274915632918	17.7387986346314	16.9794021979574	16.0581307442678	15.6842392547423	18.3744820879392	18.3131866697197	16.8445503056627	18.683844839861	17.3416518532693	16.2674258873369	20.0517801952844	17.7502131818184	17.1846641515044	15.0814398848386	17.4774327062072	15.9236801336877	17.7527645452758	20.1416866721732	17.7465100512749	16.5633537062999	17.2056612485542	17.3119129214538	15.7413672849597	16.2049523603126	17.046333036756	16.6693207420099	15.819326060234	15.9582198568637	19.1185575554224	15.1928202121923	18.7517096287245	20.1834514887816	17.54474126341	17.1965278762894	17.3968900094241	16.6420197692468	16.0104370333854	17.1854783465576	18.4033158153633	18.2468560579624	17.6284875131135	16.3327940659276	17.2843852653197	17.217728915278
3.29x29	6.48x48	16.5913335509838	18.3679138717493	16.530296730549	17.8767308812322	15.8800860828901	15.402982308631	16.3946499505174	17.1637277419563	17.0896498208711	17.1387354551029	17.3770459514844	16.9988280184253	15.9661943493119	17.7616035875143	16.6771859136966	17.0412630400449	13.9058717454175	15.8971643383341	14.9389944106021	16.4881013461223	17.7705395247302	17.0600387162515	16.5788104820581	16.1149206017281	15.9182925591911	15.5694879491909	14.8527716605353	16.9753777277562	17.753284428522	16.2354231543252	17.3233785677044	15.5963353708491	16.5919225528569	16.1820899144703	16.9906351558734	16.9695143419015	14.7401152641355	16.555893331379	16.9799482036901	16.6770043772855	16.075207930226	16.8870485579926	16.7078981023946	17.0634400400388	13.9024227385014	15.8651541751097	17.5525005341119
3.29x29	6.51x51	15.7601262368041	18.0507551365587	15.3121706168655	17.1903338245655	14.4866423300915	13.6536161144219	15.2242074670572	15.8264368068116	16.1969024507774	15.4879299133228	16.3487961942156	16.2441556567277	14.5450419731261	16.9942496745223	15.5212665076018	16.2433086838858	12.1782552527035	14.2013429646636	14.5790469510184	14.6261944127651	17.1757533168126	15.8584485369786	14.9328728649246	14.2173266122714	14.7558420633998	12.8479139941081	13.488543323873	15.9852537671443	16.2732018975984	14.9944734819199	16.0773870389439	14.1683950749547	15.9142042842236	15.4278124502471	16.7040115840477	15.2870275070074	13.4273206932731	14.7907293599741	15.9288400707647	15.8352951977537	15.6201843138934	15.8800271410347	15.9114396897327	16.1747298277282	12.5369314826237	13.9059030990439	17.0332142004966
3.29x29	6.52x52	15.9390298951975	19.1845705972273	15.4078414127353	17.6363810630186	15.5471451398641	13.7884383814847	15.4642481226861	16.1719679383803	16.3539974929679	15.8485434346504	16.576820081065	17.1433475727467	14.6514735436406	17.8770281646587	15.808454636681	17.0685855008551	12.0889059058295	14.9764663388932	14.3300866012736	15.421974063005	17.603713585491	16.6313854504067	15.1286758838968	15.048748685522	15.6728300252379	14.0318841571615	13.9264879276866	16.9085163453214	16.4947926934533	15.180493569051	16.4709241088653	16.3203967476284	16.1369390529927	16.3027994221851	17.0166034801308	15.5445564426908	14.1966496399679	15.6464962531552	16.1018497695141	15.6057629739786	15.7764692501206	17.1010589730578	16.7653896167074	17.40774853334	11.4705484611678	14.7694299822302	17.9221038385565
3.29x29	6.55x55	15.7272382826738	18.3954436206361	14.1957925456806	17.380493922786	14.2289515425417	12.4829192499191	14.7249977249574	15.4195403952258	16.0624328792372	14.7719316610929	15.6973599691158	17.2452145826023	13.9837302605564	16.3998297552139	14.432119040529	17.2076521931378	10.9996293119359	14.7616464190144	14.1505481872612	14.6639880660071	17.3463222038564	16.6106557667059	13.9359017289876	14.1228185218107	15.4473588033683	13.2715943654107	12.4111834246376	16.9072915335366	15.4240327087309	14.8725828288163	16.2877042274226	15.5350738974747	16.4376447217964	15.1588919120099	17.1368074914787	14.5620103694511	13.7975571026178	15.3004673784823	15.3352739134324	15.3229514128317	15.810120745902	16.5981142302371	16.4720008802817	17.6955719319834	11.6968377777928	13.7380082253579	17.925037266349
3.29x29	6.58x58	19.3020006735053	20.9452852928768	17.5949989201477	19.7658843465199	16.5460033240659	15.2029542523813	17.9238915696341	19.3734077797377	19.7106756352998	17.8554576810565	18.9002910824146	20.3590217348477	16.8077064169981	18.5051211830671	16.8769335484856	20.1593484517729	13.8258662658077	17.4723542489271	17.3304734211158	17.7525818685621	20.1878245732422	20.1382580428398	17.0465410567657	17.4218659448407	18.9485371730907	15.8591310606855	15.3526600301055	19.6645769341728	17.6764879430276	18.2324092483687	19.7142431759375	18.8031585378627	19.3575854124423	17.5938189430266	20.6957264670753	19.6864257040226	17.2987638286671	19.2276044009648	18.6622042106499	18.8506130669536	19.2213568979924	19.1111140700902	19.7193432699976	20.8242691588444	15.1530868142435	17.0051736245179	21.3284998300396
3.29x29	6.59x59	19.8684627487886	21.7033721112642	26.7610420761225	19.9854391495409	17.548095309748	16.2912656966854	16.4219550906705	18.5284841797703	18.984459460306	18.3528732900328	18.194980516615	21.268235587373	17.9780580152585	18.9690310506362	16.4887178397837	21.8387041053264	13.5352738428153	17.8882363859605	17.2687508812884	17.9582842443258	19.7091281643811	20.1771891501269	15.909024294406	16.2490935439488	19.4249238351145	16.1232030006448	14.4962072625911	20.9871249341114	18.685978433039	17.6955654331813	19.9957987837446	19.2171121920022	20.3822212234094	18.5214611464647	20.0215563331126	20.7436427128892	17.1533976226286	19.5445020657985	17.8889537424635	18.7104471886698	18.2895998315983	19.4746741436153	19.9728064127203	21.8832434524684	16.0662683595165	16.1575073882081	21.691865618245
3.29x29	7.32x31	17.3549636991842	19.2858056352334	18.4868086483308	18.4828435312319	16.8253537555678	17.6738318142954	16.7619759276763	19.605669945197	20.7128833820885	17.3303379366936	20.3624845487971	17.7072012751874	18.4100365290241	18.2771626080199	19.8858078287003	17.8211207560019	16.2493194011319	16.8553172025922	18.0575716529106	19.6329097945261	19.8759818122275	19.7923169942278	18.168968655375	18.4671512962882	16.57506790333	22.2647825500273	16.6736139154054	17.8091773251883	17.5571217743684	16.5113703247187	16.784775661295	16.0395005221484	19.0715455325466	18.5265852762996	19.550241174983	19.5072583414482	17.1418146938998	17.5570857205859	18.2768427525106	18.6571557585823	20.1402848788194	20.7911769748612	20.0325060339439	17.3664154620348	16.9383745678267	17.686818311952	20.3859073136321
3.29x29	7.35x34	15.9780533858164	17.2960080365384	16.4088625443691	17.1660863914871	15.3452075906454	14.9878603543001	15.3643929265038	16.92694623965	18.2149587152977	15.0420503256704	18.0309114855572	15.4698114726715	14.6524883893488	15.7126318610219	17.5604301484901	15.7945803996181	13.3158636971095	14.5569739643925	15.6484274289783	16.6465683550695	17.7117449168624	17.0248784430315	15.5646721134754	15.4521639261302	15.4133342920992	14.1974547366773	14.3713574515423	15.5809374878407	16.2307848547136	14.4278939211515	15.6330330070655	12.4006300243173	16.8515149764049	15.2588314428072	16.7062473943133	17.0084635990439	13.9899701929632	14.8143316082772	16.6120678423849	16.8711481826223	16.8288217650553	17.4928895554737	17.2379891518704	15.2258656239966	13.8953398303172	14.9587001440633	17.2839980907196
3.29x29	7.36x35	14.1333789661213	15.6266937322007	15.9355490335288	15.9050451429727	13.8930479017385	16.6432134517346	13.9542895555453	16.7525221981647	16.7724994857654	14.2774017944443	16.6072149983072	14.5931854301931	14.7207963099827	14.4324867573125	16.4765070934346	14.5767364317257	13.686170757374	14.2979420197454	14.6400008879781	16.5906394090162	16.6055772859603	15.795868953622	15.2474201424372	15.4594774167822	14.5142106226966	14.5373659581095	15.06046642704	14.8181749551016	14.9502688939029	14.2768370796896	14.9872028410908	10.7993142837867	15.8327189389568	14.1754102938857	15.95464277256	17.392856637137	13.5644200392055	15.1293227211267	15.1178232560114	15.2483879147928	16.9292359544074	16.810686660574	16.3670548358585	14.2760707829571	14.7798406960292	15.1693993618732	16.2427880611673
3.29x29	7.39x38	12.8439079333356	14.4047462664221	13.3214514599574	13.5531070238525	11.4451975081254	13.1259742876481	12.5021294186231	14.296714237894	13.9491988658847	12.388381088746	13.9685192128586	12.5453835732512	12.3822444653625	13.032945215875	13.9042414751758	12.2673907576143	10.7662829240179	12.2988007545451	12.4975525203937	13.4611278130772	14.2800854689319	13.3099617580217	12.8930847356248	12.4139136858607	11.9228044519735	11.574179711755	12.4398232302553	12.4525019975907	14.2489382411463	12.2821488755022	13.1880948586215	9.88782782010286	13.376082909432	11.9411202154572	13.7372151471832	14.4294183874472	10.634646867668	12.5906564562774	13.4448782069604	13.6071045413784	13.8269023645935	13.3122622420083	13.3532054953109	12.0987310904904	11.882227653096	12.0442581340654	13.4125867751154
3.29x29	7.40x39	14.3442903275136	15.009056299448	15.6222829637669	15.4329043280907	13.7240325706405	16.3307679243813	14.2962899033281	16.9165458944786	15.7126347567809	14.3330632455173	15.548743646996	14.1770606967735	15.0951724733439	14.670268743278	15.5356862416824	13.5900496687834	13.2460268005165	14.9991144405262	14.4541893581065	16.0018685471416	15.3368492526986	14.9592160222386	15.2396342147704	15.0982688080455	13.123319816266	14.4937071517262	15.176558964403	14.4664152781537	16.3774734925751	14.5689076117601	14.9454905573554	11.4510972836667	15.0772571444544	13.1280014092016	15.1361509968684	16.9983742163773	11.8181042896058	15.673851536875	15.1054165450675	15.1692055494017	15.8953140893787	14.9387265186829	15.7144788332289	13.7546744781547	14.6396559044262	14.8231953707694	14.5527955733598
3.29x29	7.42x41	14.5907053290785	16.5545420051417	14.8338154228776	15.6035443089062	13.6701583750884	13.6297443482994	14.4061832558107	15.0677396115011	14.8367122031803	14.7430204842834	14.89583136317	14.3878688136916	14.5777459505919	14.8731074426295	15.1949217832801	14.1722570538359	12.1027971973424	14.4233147715773	12.7400510595523	14.2624874408358	15.255726203626	14.842990803743	14.5631641136121	13.6944591715044	12.2487191575283	13.3204281462722	13.8281642310178	14.2324629632401	15.1358209556007	14.6694856419712	15.3850282092689	12.6113073866273	14.9380209197872	13.4608175086062	14.8453717029921	15.2727659904812	12.4480528999519	14.3394743278825	15.1347845045775	15.0386994450983	17.4772005481427	14.3243102451741	13.9863079116685	14.1730014464121	13.1134749017947	13.3605240166694	14.6275264142643
3.29x29	7.43x42	13.1402219920365	14.6632278847463	14.205596573182	14.7849033138536	12.7254164961309	14.8236752190542	13.2956822314615	14.9659243616958	13.5975385272482	13.7787640955203	13.7171496310276	13.7316355180292	14.0380094386633	13.2702327786667	14.0224934301999	13.5622172965928	10.9021159872751	14.1311498116749	13.6750235465976	13.7837567448065	13.2735962722994	12.9338187323002	13.8693719035867	13.8755945097859	11.1636719317615	13.6361027056854	13.7614175868622	13.5585901184452	16.2604227497319	14.1638248365334	13.9403832802402	11.2816774461957	13.7791425712923	12.0056755744939	12.7600461989759	14.3571819310058	11.1546012479156	14.3092392879566	14.0548158294586	13.9032920202375	13.7098807069938	12.9949622161821	12.8445523472015	13.1796290539605	13.0938955624367	13.941210026393	13.8214751021734
3.32x32	3.33x33	3.83532710469394	3.79471817135344	3.83386071734486	3.84659303800129	3.86765316438793	3.80497174759551	3.81522030818667	3.79115299084593	3.80492062992121	3.84061284172201	3.79216771780996	3.8114638919974	3.87033396491828	3.81789719610154	3.80688402765306	3.78785150184112	3.80713461805594	3.84606435203573	3.79977551968534	3.85303841143584	3.79125665182404	3.83603454103323	3.81124559691448	3.79339241313103	3.78250948445605	3.8085331822107	3.87206482383754	3.80848053690708	3.8726328253528	3.81253118020036	3.80920608526239	3.81167325462191	3.80653411911676	3.80561243428702	3.84168986254747	3.80501997366637	3.80002118415148	3.81353877651716	3.8327285319991	3.80661214204967	3.86552635484484	3.82219177959453	3.82124181386104	3.8043346330206	3.80286115970594	3.84570942740088	3.81776793427783
3.32x32	3.36x36	6.47445387658295	6.33632519683136	6.38521244752279	6.18167121416207	6.23022222717617	6.21693863569522	6.60880004236775	6.34430059186984	6.34616128064833	6.03957589570659	6.43761034856879	5.97065984628165	6.38766099601411	6.62543666485463	6.62790238310735	6.01888519578169	5.88016989550472	6.22422348570487	6.37747928260061	5.75380621849572	6.09597047236944	6.09444804719838	6.24179108910255	6.3757830107368	6.59441142180256	5.92792619724639	6.38159776231627	6.04521273405659	6.41594334451295	6.24216540953538	6.09148807763752	6.28334313880756	6.2287839102027	6.32508663972281	6.02503659739922	5.9858709474896	6.12321957796714	6.44034828250771	6.31163093027468	6.71812161247473	6.59034612141122	6.16648108729768	6.17792408499813	6.16389462920968	6.37062744162614	6.46560484409618	5.98859866746804
3.32x32	3.37x37	8.695900700905	8.77615525158939	8.59287408263382	8.62316931296145	8.78716370622512	8.77765276141634	8.79911796716012	8.97561841880547	8.8571477350217	8.41368587481135	8.93244927217613	8.56650138621362	9.00913031318784	8.98143468494873	8.97429239550395	8.49783395930987	8.50252303731075	8.54218976609629	8.59486433866178	8.25454075039914	8.81930070923994	8.81726703689981	8.51276535562915	8.85473720671596	8.92990649447126	8.23671269378749	8.95057193703285	8.57095782278737	8.79998937499359	8.55787222386499	8.49725920517904	9.03435321425945	8.50091436258477	9.09237647702731	8.71941930405919	8.33202958468103	8.43727716742789	8.80769266039636	8.67068146110789	8.86151307621898	9.13210561699764	8.48207857780155	8.34397189592582	8.52521489465222	8.51142696614381	8.8042624904077	8.51116272902828
3.32x32	3.40x40	12.9906191153463	12.7336111138985	12.8268553043994	12.7440590472581	12.6008535028386	12.466467743511	12.9674569981936	12.7848051608149	12.9726215161007	12.2611805304383	12.8691507489811	12.6785805199163	12.3515978318596	12.6230868253371	12.8380745441051	12.344039290281	12.0465680589951	12.442160342963	12.5569309944747	12.4337802377234	12.7563016975925	12.3101445158048	12.7456208558077	12.552010994259	12.481641638823	12.1489812330088	12.5667126568566	12.4301844314556	13.3967981249252	12.4840348045013	12.9130846043848	12.2774895642391	12.6715892452368	12.6243083374892	12.6008954046925	11.9849597829947	12.29498702724	12.6739891510132	12.8916984528804	12.9072569897713	12.4502812016436	12.8556167880036	12.8612797574736	12.4301439251523	12.3852453346714	12.6658976784119	12.6129274952328
3.32x32	4.57x57	8.70774293373432	8.94177029452222	8.45895206275577	9.54644279299887	8.14179771303611	8.14469895085141	9.03389445366726	8.22411387323887	8.81228943010839	8.78858748605258	9.05530860876646	10.0408456317185	7.75802333072027	8.32449578052629	8.46771610294063	9.81151181011367	8.49787008608628	7.57833715270045	8.62465593516634	7.85096312562987	8.66564169580072	8.58434749995597	8.48340503571532	9.625380096391	8.73768539145236	8.82396112865418	8.94918465559852	9.4631935941309	8.49153513800655	9.2993385786302	8.30769095477197	9.61738592342015	8.86652524949881	9.3257324645306	8.49651375565296	8.18219163794151	8.88013434583059	8.24575284616268	9.49565042532633	9.11271205514583	9.09802665417068	9.21636918748376	10.5232286870523	9.4613008090854	8.2045498353048	9.31574613222151	9.77182623668677
3.32x32	4.60x61	10.915293124786	9.40188858687445	10.7209206227824	11.1470456175616	13.3883702144809	9.27877540411449	11.4870350395566	10.7583044667829	10.2541575470635	14.8173239486758	10.5719312805182	10.807548149326	12.7871451856933	9.23802668322624	10.1746706580606	10.5976398787655	9.49396513581127	13.4859126869486	14.1427216970426	13.102980920386	9.8402392755461	9.40540456333486	9.93088888267309	10.1923385442204	9.50757356006253	12.6645106498435	9.76889522924676	10.4745182705459	12.9483020122331	10.7364406578717	10.3069294651705	11.5728624808212	10.530062155562	10.0811524638803	9.6462016358772	10.3372834922914	13.5346070500772	9.25627338619598	13.3477109648059	16.6142754882661	10.4416808512806	11.8517233346041	12.6615569737691	10.623868598585	9.37953522302678	9.91162433711044	10.9074247189701
3.32x32	5.38x39	15.8028706885806	14.2226802326425	14.1743247458212	17.2816689298227	14.4723386845389	14.1078948819447	16.0191167359502	14.2447237600453	13.9470522333574	16.5236361918314	14.6625875615459	18.5845522141374	15.0889952283113	18.8354364430453	15.9484972646328	18.4299951709164	20.8330787931117	14.5812989133342	14.6377700829054	14.5691713903022	14.8877602748029	14.8715603081856	13.926365319063	16.8352213528661	15.7589984453328	15.4363180843101	15.7218428309152	17.8554686860917	15.4454590414141	14.192782672894	14.4722082972848	15.8540479058189	12.648358351976	14.6763125477758	14.8330869342831	14.7126298464958	17.2255556078752	14.2174041582843	15.7075524828027	16.6397949506597	17.040179605861	16.1980602542403	16.8902658356818	18.688488381889	16.861408363479	16.4931080757994	18.0982714367975
3.32x32	5.39x40	15.0093616786324	14.108108909418	13.3174478035395	15.0579616814495	12.8404670086411	13.0322072574066	14.8877598717873	13.4193763640491	13.9125477896753	14.9576894271809	14.1660536494819	15.8572946936103	13.7089766211778	16.1178053717	15.6260124471984	15.6823347113878	19.8797888318765	12.5049213512121	12.6187001707783	12.4422731845913	15.7112101698119	13.9665419485283	12.5735431362842	15.5836003863035	17.4030027294143	13.6947813053002	14.3653335847101	15.2107983025218	14.1711594797321	13.6717933717563	13.1165225193265	15.3451435314239	13.2860083170228	14.6416775678199	15.9924549710168	13.2439209073446	16.2713035126262	14.4720572829159	14.6833136246557	15.1505201230849	15.3645949181877	15.5090259526509	15.4790926736679	16.3326605609741	14.1997798926603	15.2488521207335	15.7518047537417
3.32x32	5.42x43	13.2848277745705	11.5356626164256	11.9250300209266	14.0045953529547	12.368338085612	11.2000187499843	13.1987154678022	12.2407874746684	12.0910600031594	12.7104562860662	12.7474371541891	15.3289849631344	12.6833663118275	13.7331874304547	13.0377268724268	15.0772140662657	15.930128561942	11.8973675659786	11.8751216835871	12.2216925587252	12.7119836768303	11.7768094151175	11.780473207813	13.308050570989	12.5234805465573	12.3443460742155	12.4399290190901	14.3368132442325	13.3015804324148	12.1126417019575	13.3301559255697	12.8774083184467	10.4825736343705	12.4870944979206	13.3149961321812	11.3075786974931	14.5476638330696	12.3590147261018	12.4904521135145	12.8002856999365	14.0409225124277	13.7929134340791	13.9988832054561	15.277993160098	12.9412768303595	13.1681450857742	14.6382036466228
3.32x32	5.43x44	13.265412696181	14.3968203781252	13.4181025111601	14.3847197400575	13.7407102072637	13.0734135175171	13.3504256860971	14.5462265553648	14.6721199899674	13.4329562271303	15.118532666896	15.2780582863137	13.8251403971171	15.1781315384997	14.5783338554171	14.8089235598	16.8284570296864	13.5634482709966	12.7206214077772	13.9196250308692	15.8788958369277	13.2686839211732	12.8957432123938	14.8066860910874	14.7765455705994	13.5154328454549	14.2299177088274	14.7544716272729	14.8491787651708	13.5106554245159	13.4099480983336	14.8995182136873	13.0735265326537	14.5928620222354	16.347637138131	12.2705202416198	16.0656868511745	15.2472852993574	13.5486990150346	13.5136676368779	14.9512524558981	15.8284522932598	15.5753318423718	15.6889954107967	13.1232808016898	14.5990417493752	15.1011025094196
3.32x32	5.46x461	12.1662203662436	11.9494817460842	11.492951057061	13.1404340110972	16.0425418808866	11.0981462866553	11.7939456502054	12.4555660650169	12.4878577025845	11.9074601825914	12.8369079610317	14.1616988034628	15.7034657958044	13.7454755465208	12.098645420046	13.6090871111916	12.4394296493047	13.7994137556637	15.410659590037	14.2737064913077	13.7437560004534	11.5548603626353	11.9794180576521	12.0389612508721	12.2327740925761	15.0015663848813	12.3878925164856	13.4320794369301	16.3728570811572	11.9006972064665	12.1191675044122	12.0116578789108	11.2037886895461	12.5533310718709	13.8415155962055	10.6369049069736	14.288416497289	12.5067642897754	11.5342855001946	11.7963046332315	13.5586904234885	14.064353166783	14.1691410466549	14.298976956412	12.1246638716296	12.4288448377152	13.5896500690783
3.32x32	5.47x47	13.2034370146565	15.1920372893171	13.8746175082414	14.392717811449	14.0376948606244	13.3029601593029	12.9688014095367	14.9619445928663	14.9251289776672	13.8841890292519	15.1082930207221	15.1309701275232	13.6614893404782	16.3318629066007	14.2013487387642	14.6114528025108	13.8194731448055	13.4149795750869	13.3883118427978	13.9297190567506	17.2238915753671	13.858627709842	13.9120164246597	14.5819177751076	14.8212750463649	12.9065622456175	13.9336078601344	14.4671764695119	14.6967669233747	13.6081753001642	13.377889706527	14.2529865642258	13.0541056376912	14.5844104783155	17.3537015359836	13.111367167462	15.2697319884797	15.0980778246769	13.630838785636	13.3963402091765	14.3867548112839	15.4787678450192	15.3251038821928	15.2480433170948	13.3527652941254	14.470399476172	14.7067805110432
3.32x32	6.48x48	12.9279966738857	14.5713994180381	13.0211094381393	13.4827986708992	12.5909406320576	12.3437209138898	12.9299754833488	12.9062633631892	13.0225394604893	13.6787233687943	13.0971397640859	14.0007479800188	12.6340388633247	13.6043411821374	12.5190401389244	13.8243007418097	10.5749519147843	11.6951763133353	11.6529221657059	12.2148905848558	14.3409243077286	12.8566777201577	13.2835849829781	13.0507302860798	13.0195491857437	11.2337200427997	12.1734640509594	13.8597023777569	14.7243700714156	13.3824418175459	14.0463130037743	10.7710969729178	13.6446299326878	11.7711468854993	13.535780287815	12.4483644708853	11.5773341491036	13.9462612194093	13.1430486950327	13.3943154360348	11.9313528989801	13.6226164153587	13.3951314289931	14.0194172846092	10.5772390064705	12.7271669274823	14.1741436778382
3.32x32	6.51x51	13.6530548962494	15.4419239733914	13.363028773448	14.2060016190341	13.0265151901804	12.1521799278977	13.3644143904625	12.6485130351358	13.4407667936022	13.4613008658153	13.3120087514995	14.8390738592407	13.0267751189617	14.2829593922268	12.7876810251116	14.7371267891676	11.0627308563483	12.8145102520541	13.0555819862617	12.8765975707871	15.160695333658	13.1345314724203	13.0119008987926	12.9070963814485	13.5023489808255	10.352691678979	12.7036784436635	14.5983074018874	14.6634641882469	13.9267236994205	14.3114873440883	11.4820746383221	14.4119070216263	12.5429038105217	14.7620067741483	12.8914648120375	12.1853528877911	13.8342953922489	13.5547376957284	14.0883630347887	13.0819016966189	14.2190251072287	14.4612568610062	14.7931311763264	11.2513223222873	12.6107803882234	15.2594358349187
3.32x32	6.52x52	13.9333729225913	16.6088551682529	13.6891806182839	14.8784580518278	13.9505731065071	12.7369024884389	13.7687152995477	13.1553022390213	13.5861788962166	14.0076825706467	13.574043244369	15.8508086859945	13.2663629152831	15.2995634251439	13.0599259569111	15.5945715555125	10.9658120994298	13.5321262556924	12.9474132165464	13.707064674831	15.7272313202293	13.9258813365618	13.4477889260651	13.6677537291246	14.4724286144379	11.8107055674079	13.1982015820338	15.5442324352153	15.1196033016743	14.3453321676425	14.8011968772799	13.3026035421642	15.0379370925669	13.6235168000043	15.1706726614214	13.4498781407119	13.1899540939307	14.9128447655033	13.8592039453931	14.1294991772532	13.5084396582285	15.4218377958011	15.1358405779131	16.0360768893143	10.3655707512901	13.3397713248766	16.1925732976572
3.32x32	6.55x55	15.3798534128255	17.1015384395674	14.2075377528972	16.1409126755583	14.4556476160703	13.3035558028671	14.6627848991929	13.8660925281782	14.8767222532385	14.4604204987269	14.2815418635384	17.3197732086768	14.5373793374184	15.4637712411947	13.4371399486647	17.1110370521485	11.9975045738687	15.6955371363964	14.499020553127	15.1542609189627	16.8429402718172	15.5140111512142	13.8712568284204	14.5360468491265	15.7202196231478	12.9643897658162	13.7131077075913	17.0256233366065	15.7141066243042	15.6587060129501	16.0773462051422	14.5786005501214	16.8085346773596	14.1677606205074	16.8397824213973	14.8457734389287	14.6515565725966	16.1529994118739	14.702104135123	15.3754371970361	15.0958491645883	16.3666112863965	16.4677858256658	17.6515389980591	12.7467472321373	14.2336223428894	17.6788778207215
3.32x32	6.58x58	19.9148224446014	20.6072072101001	18.625450813336	19.744850543876	18.0805212867329	17.109236043728	18.9114858749914	18.6585468083664	19.4053888134198	18.6820396370418	18.4271935193615	21.3013735237895	18.5258157445226	18.8187614098272	17.1384496381674	21.0287950439392	16.194028436433	19.8357704665082	18.6292992890232	19.5812517730609	20.7061032065427	19.9020234147184	18.101706797979	18.8910226827454	20.1392661733242	16.7080922010863	17.8342350270484	20.7133097548412	19.0952547508537	19.9589230420882	20.3797831195526	19.2565631928441	20.6637352141378	17.9977684727857	21.1213816072718	21.2566343055527	19.2513202144684	20.8683242499248	19.1391398448311	19.9358649172791	19.5960838179469	20.0512458465802	20.7494030275572	21.6500559583572	17.1442403447922	18.5660335290013	21.8358667105293
3.32x32	6.59x59	20.688935472856	21.3166836069779	27.5539417506824	20.2495014506531	19.0232950090146	18.5785506969731	13.2821060077083	18.3057837308322	19.0793506178801	19.8461194695588	18.2775228627952	22.3711775505895	20.055944305866	19.5159136603952	17.0517548070573	22.7979291603426	15.8340585763726	20.2145336824771	18.9607302074577	19.9296846186787	20.5577643239726	20.1375158597082	17.3131670990608	18.0627093759491	20.6651350104469	17.4078196796727	17.0883265418238	22.1753217338554	20.365989344984	19.7723540834166	21.0519694328108	19.6573850753349	21.9222696817642	19.0504642988039	20.8734614522843	22.0962124356189	19.3063399431378	21.2739281986191	18.6094254075724	20.1578922757316	19.1613738025226	20.4283673845954	20.8267125826425	22.6983938859118	18.4559395859436	17.985860946866	22.4862729237195
3.32x32	7.32x31	18.2507131367517	19.3178229104628	19.1722890912901	18.3310650536187	18.4243646023411	18.6992662155497	17.998491603465	18.8338712430557	20.2739693449507	18.1958137218427	19.7853956493167	18.8074259004256	19.720350529339	18.8266550932448	19.7417910788257	19.0916669256511	18.3450713271985	19.3715866412641	19.1648952253854	20.7300313796193	20.4183642831643	19.9289489185958	19.008141545138	19.582829724021	18.1851914204938	21.4239595546668	18.5245713040815	19.1890508363494	18.825962206485	18.1649837324452	17.6987770763971	17.945519607969	19.7437398939512	19.3308883137842	20.2137889817817	20.5617590930348	19.2846517987751	18.9129437423157	18.5183568655537	19.3755196059357	20.3310882394426	21.4307663185431	21.0811733307233	18.7043661480415	18.6629978299308	18.9995329679442	20.9739358967267
3.32x32	7.35x34	15.5121729296704	16.0713791256382	16.027299304624	15.7880766719699	16.0730997010533	15.0575929019216	15.3119825953402	15.1291660378224	16.8856203321051	14.6813302530799	16.4177047421374	15.5614225892108	15.0366752309146	14.8896588611022	16.2834413131868	15.9583687449564	14.4005797452741	15.6044249493533	15.5043018546467	16.6808673035907	17.2170308996644	16.0271036372764	15.420270717468	15.5872630374931	15.8026872714738	13.6239562535998	15.1458760723835	15.8577635245327	16.0947341388418	14.7389848022176	15.1638470382684	13.316768451843	16.6944285616489	14.5810249296818	16.3054072319584	16.8487018787799	14.8640423169473	15.1855805618356	15.5887343296369	16.5535419170642	15.913116225303	17.3554047489536	17.3336141932374	15.4736807838342	14.6522793448664	15.2496049457027	16.9364218771262
3.32x32	7.36x35	13.6743660182109	14.6682402489188	15.2334632306643	14.3614577950847	14.3501582569671	16.115148029106	13.6920462312979	14.7630007112375	15.4461274758433	13.6998367143554	15.0207889939244	14.3164121552853	14.6304306840229	13.5351437746335	15.2788993713553	14.5490148807402	14.5898017464255	14.8448416966972	14.6905753801544	16.1798796658072	16.0917457101459	15.0109873426101	14.8057992692053	15.3093369222837	15.0259908491919	13.6140669162451	15.1587084542187	14.7817446196313	14.8026437503576	14.5013189400137	14.6437716794547	11.956483847687	15.3265565930512	13.8466910848766	15.61453620829	16.6632341698723	14.115701434927	15.072600372862	14.0029375489574	14.6664653205876	16.0327438075958	16.5103893049195	16.2405034712598	14.2984549514974	15.204960177521	15.0948375281087	15.729121335917
3.32x32	7.39x38	10.6756271946898	11.8831718829612	11.3010395097088	10.4417029741321	10.2387593975051	11.4404917289424	10.6300399340736	11.257229499304	11.5316270317766	10.2264766170955	11.2118940861926	11.0018788849905	10.710233237423	10.3705890864502	11.3390573241341	10.8812992330879	10.1781120547968	10.8332254199753	10.9645132130889	11.6120970543653	12.5210903678553	10.9855914269556	11.0480874815508	10.9504943267416	11.0991692031431	9.16755959893362	11.3091388266304	11.080481803604	12.3644563568319	10.6928879635017	11.1319309196563	8.17407548289102	11.6531616310768	9.74747562192387	11.9468206230779	12.2638337399037	9.83897443842599	11.1962360639636	10.6409825674136	11.3653939219017	11.5878407393267	11.8470123237886	11.9699434418046	10.6778954387089	10.8698298514742	10.6959515238243	11.7926990125247
3.32x32	7.40x39	11.7589835445076	12.5054721622176	13.1262769283602	11.8121558997501	11.8627233804047	14.1261042400232	11.8692480806494	13.6183104311805	13.028118743702	11.6043552169002	12.528339913971	11.8754461810915	12.7158887223819	11.5138058868473	12.7039764247262	11.5454708435819	12.0841588867409	12.6702948268775	12.2055941682492	13.3418522327299	13.229076687358	12.4689175552652	12.8897257534829	12.998041467852	11.8871197520678	11.66294139572	13.2630889690147	12.3821680654076	13.8080673520953	12.3176874858879	12.3160522895934	9.60914491513163	12.659650429613	10.6986065447796	12.9408219213464	13.975831531612	10.2641325498066	13.6593432492196	11.9826992368164	12.6240026932824	13.0768932090157	12.9352119812549	13.7802333071686	11.7059083799592	13.1405562287142	12.7957850091348	12.2752540095918
3.32x32	7.42x41	10.7557324715707	12.8485042709259	11.176928961034	10.8727161279967	10.2693957952744	10.3739196545954	10.7635141566312	10.7754350724228	10.9933477157779	10.9282086821217	10.676579695764	10.9784156871563	10.8844349876326	10.4578056015591	11.0094333187499	10.8148384638884	9.22581102125987	9.81113061782382	9.04988430865279	9.88536322043859	11.8571914465442	10.8686082365683	11.1326205360643	10.3427196133319	13.1238149179269	9.08666941183622	10.9052993998331	10.90516478555	11.4220429871368	11.3760485670553	11.8118766078892	8.17871683089713	11.5862204795179	9.14608971090924	11.3815505973483	10.8919273776499	9.02373276421681	11.3830782304261	10.9835483337581	11.3555311632702	13.7834370532172	11.0064805001417	10.6755381129009	10.9191267507983	10.0100338161267	9.94396475255217	10.9879689205967
3.32x32	7.43x42	9.19742295428453	10.7295172771192	10.2840604335058	9.94773989406639	9.15284933777455	11.4190579734057	9.4468382541462	10.9634499132344	9.83367098290359	9.7267358348009	9.60376561563224	9.91173980691584	10.179064642687	8.52529477496233	10.0039924030359	9.73550589337811	8.08658976330567	9.56587821373448	10.0093211558027	9.40219346748406	9.88952238482729	9.05239272236904	10.1844906598219	10.2798339480752	12.1911272653516	9.59661221473495	10.3869285643062	9.95647995026355	12.3233184654134	10.4419558512761	10.0799526784604	6.96862647872592	9.98656857984764	8.04434093011976	9.25779865842847	9.74526531193482	7.26392490324618	10.9248476877254	9.73652792323834	10.0192208279886	9.76187456383249	9.66461225295666	9.54034475268059	9.54685691733148	10.1352775985663	10.4090329041655	9.87326369545552
3.33x33	3.36x36	5.37577761816837	5.23550904879363	5.32418613498814	5.48830839148093	4.94038905350581	5.01562079906366	5.50378215411911	5.03028935549437	5.01850196771905	5.56489370967676	5.02459898897415	4.84900546504126	5.39497451337817	5.26899610931722	5.24775628245063	5.09196818528946	4.94243199245068	5.02607451198248	5.09787857838925	5.33541760314973	4.64136736318081	4.57211373436838	5.38135865743959	4.98401093497998	5.4907290954845	5.45976702799671	5.25595167405485	5.00891415378623	5.2685688758903	5.21474553549835	5.30070372686495	4.84095424477447	5.36801238821223	4.77569900642831	4.71259387174409	5.37807344687668	5.23728278785861	4.95395195778078	5.18931103326829	5.33506982147376	5.22230389770644	5.32976875670981	5.35321669652929	5.18431837371124	5.01653934500668	5.16214848682213	4.95019979394771
3.33x33	3.37x37	6.05883445887078	6.24836450601275	5.95401385621498	6.18657457726002	6.03661038994567	6.16102150621145	6.28056199714643	6.25688013310148	6.24196403385986	6.04978685574955	6.21682925614014	5.71870658453465	6.61026701427408	6.49699792211757	6.30827599269404	5.88969854916192	6.00903636201346	5.98802212754763	5.99390498756862	6.08597157403812	5.99043387410294	6.02528912169367	6.02070452688055	6.27027694763158	6.52725378700721	5.91873001580576	6.51485180184477	5.95152971932427	6.05099281110133	5.9507635644512	5.9460734102431	6.55404523939224	5.95726019240389	6.30131700519821	5.85880448555846	6.02782829881542	5.8832932104392	6.15075556334342	6.01944889504014	6.09642009707336	6.38309180570042	5.84172825454934	5.72545771096076	5.87205458080901	5.69869809693407	6.2831012247138	5.89825219874498
3.33x33	3.40x40	11.1103107517297	11.3358130718533	10.9547962555221	11.0866743886524	10.5734027635383	10.6088775089545	11.1788160822155	11.0854893441832	11.3590918651096	10.762359360289	11.1134583726219	10.6129877508645	10.5946743225075	11.0742036282525	11.0593452789937	10.428455350626	10.484202878617	10.4366136749427	10.5868659196195	11.0344862136848	10.8156271200518	10.4821174864624	10.905490818849	10.70368899025	11.0719952131493	10.6467411915572	11.0419625520104	10.5131390649986	11.1547283696198	10.5709025631684	11.0395317382577	10.8130586329678	10.5869486633307	10.6869273881692	10.6602486837784	10.6837453170693	10.362778247169	10.6127634949621	10.7422795066969	10.7790765374405	10.7278949472858	11.1305775681229	11.1212077581529	10.3995749913158	10.3296168854416	10.8946958195261	10.6799485017485
3.33x33	4.57x57	5.69315316849986	6.1479422573736	5.63940723835405	6.37325301553296	5.02027300054489	5.17532327492689	5.96932785160943	5.61510160193028	6.11877242590375	5.83490608322019	6.33725887115242	6.89805465330625	4.97263722787014	5.35962993125458	5.81085484244788	6.70190562452203	5.64578373655952	4.63307683942324	6.29601445360476	4.69136962943659	5.48242583169166	5.50238666398502	5.63549412208016	6.60296115390663	5.26680871116467	5.84813141097223	5.86653884330446	6.40689823549586	5.50120623136417	6.39335952375588	5.54758884561572	6.46680485247545	6.21163569440449	6.11711059242842	5.23706740456909	5.51791817626902	5.75026773289731	5.41700046151004	6.10156578264957	5.87960517381907	5.75100591201226	5.78449522430436	7.06025587355019	6.46144604558453	5.37904108554675	6.24089376612036	6.75715946237766
3.33x33	4.60x61	9.19544311058472	7.91655486938605	9.20565929197904	9.41017311211648	11.9404308967474	7.7940714007507	9.56170769266662	10.0004746887335	9.39445762138507	13.1412429396918	9.59413127906847	9.22848860865093	10.9326988891124	7.56371191942157	9.29437168398166	8.87300309928944	7.96027386463556	12.1731848749619	13.217377387364	11.2320196759087	7.62510472059237	7.81868313720412	8.40956711133219	7.88392294482892	7.10268688596083	11.2015277975819	8.09601667488401	8.83451305958625	12.0261337927033	8.71860676943283	8.62926601745479	8.80043231892616	8.76828563631455	7.75751461487504	7.74507036765968	8.9337139533343	11.8752150717366	7.90627782208544	11.5924352920342	14.8557431991806	8.29763659122283	9.32437761998087	10.0038867446608	8.96134978672298	7.8320787789705	7.53794667001565	9.26526146420057
3.33x33	5.38x39	12.6736850994492	11.5099374020887	11.1977119984397	14.170061009043	11.4216293933922	11.2314516425972	12.8767994858971	11.5152774174138	10.9577071050471	13.12930455127	11.6661711799545	15.7090687820762	11.9951339300568	15.3246606813985	13.0142078130019	15.3397864717864	17.4872376892407	11.5209605936311	11.5522126452035	11.2779002478298	11.8771106334832	11.9204092631084	10.9589080660438	13.5602549386064	12.5916697065957	12.1816864595999	12.2629741090814	14.9321609286801	12.4192917672466	11.3662184564612	11.6023836344089	12.5335611060863	10.3111630284852	11.6619143368488	11.9560460437387	11.576931804239	13.8409041250924	11.5117596830372	12.6010785649483	13.5547137188507	13.5775477535526	13.1620889679412	13.5869336128503	15.5870811892413	13.6969274291718	13.1409421656135	15.2008481671254
3.33x33	5.39x40	12.1264511708908	11.8444310542972	10.5686589499331	12.3470632135743	10.1765905882078	10.5580626063687	11.95849028933	11.2220527088407	11.3082180293802	11.8984473777044	11.668120499892	13.254487013838	11.0611153596733	12.9085717645292	13.1234984283917	12.85897184848	16.7542056212761	9.68209817136761	9.57975072744589	9.47875777726174	12.9235373640501	11.4642291062243	9.83696833379065	12.5309502831988	14.394818720637	10.8068073916398	11.2263934101741	12.6069298800303	11.287757970474	11.0251466203403	10.5484884225182	12.4201596205524	10.9628434723843	12.0755295536055	13.4091243934867	10.550406816801	13.0938167468466	12.0756900423951	11.7905098702304	12.1838944512828	12.0436058138749	12.9011544444674	12.5337429764616	13.4989745906865	11.1139486232392	12.2093984290791	13.2186197842286
3.33x33	5.42x43	9.60340621862889	8.71116467528883	8.30128044340149	10.5173508546592	8.87448826693686	7.87973108678209	9.52321458332217	9.28791747379357	8.78411617637198	9.03378746705943	9.66555502803641	11.9580885178192	9.30330812130825	10.2003324455627	9.79941773780463	11.5792760999987	12.4887849689231	8.24613897530232	8.14510092018509	8.65292077855795	9.53861530831389	8.49646850167764	8.14180508241262	9.79337398448563	9.26720567377243	8.8364864623899	8.82596204387941	10.9829177361938	9.61653893040526	8.57883051470304	9.81344536847279	9.51052764046244	7.11710601298028	9.26109426579818	10.2125951158361	7.84576554582151	10.9141470578328	9.28541108406084	8.83121339341317	9.16216601028381	10.2317628490891	10.5774001058861	10.6179032770128	11.8132983116486	9.23389067511631	9.6282834399492	11.3554942648922
3.33x33	5.43x44	9.87565845905983	11.9157979590122	10.2081314156901	11.4538519284999	10.8467998967437	10.305399215945	9.97558459439847	12.1215318338896	11.8185901866509	10.2036449369821	12.5555907069321	12.3243859887623	11.089955365104	12.1485542349697	11.865631630891	11.6947318908986	13.5979349167438	10.3057646974885	9.32112058713972	10.9096033841749	12.9493889431123	10.5336792242787	9.73474283173418	11.6855310106131	11.9821864866142	10.596821882055	11.1209289180356	11.8724899241903	11.4576886412574	10.3491936883991	10.2859711743714	12.031764043564	9.9841729752644	11.9030283541627	13.5097676145817	9.47833540237947	12.7687379564309	12.4931576072665	10.2220466150375	10.0960059924705	11.5003071263336	13.0990101916137	12.7064790166277	12.6129984143343	9.65120997595638	11.5361319774004	12.3130417444269
3.33x33	5.46x461	8.55637201154788	9.39893653558742	8.0807254624817	9.8183197136781	12.504410461913	8.05041371607696	8.243879790487	9.66620447745649	9.52190952487998	8.60897549073059	9.99569597376791	10.7892682791745	12.3062066047991	10.7966095141021	9.0197481672162	10.2201293044658	8.98350043134635	10.1102420841442	11.7145906031752	10.9090282793657	10.9900304822143	8.50552908407233	8.60718897201636	8.94305663629611	9.4024653150118	11.6039566097086	9.23052593301162	10.1087468066027	12.5678293272944	8.44710636845541	8.6094038121115	9.12004978056589	7.60584518643392	9.73711584608092	11.1136907011127	7.87774796499609	10.771033794395	9.44411398702917	8.05797778602051	8.27001735185604	10.0722518832682	10.9069572292184	10.959243085177	10.8836639970187	8.57235387743647	9.3160846389457	10.269242864009
3.33x33	5.47x47	10.1212997683104	12.9779596624431	10.9477761668752	11.7333666098013	10.9802840582564	10.8787948321494	9.97194624935374	12.740432370999	12.4607231732352	11.1425306820309	12.8403047471624	12.3694826084198	10.8163283049286	13.8133551680973	11.7699666099781	11.8232054029354	10.9207024499343	10.2137010921605	10.0486262742725	11.2059717115474	14.6624079195745	11.4567165889709	11.0413433965256	11.9626213682453	12.5362980979235	10.1014196032043	11.3728880237168	11.803985555735	11.2051321723575	10.6882998180253	10.4764966472576	11.9745437073819	9.96577252399431	12.378968091081	14.8429435759892	10.9189588331489	12.2158969380066	12.5406029360633	10.656600114483	10.3711443438031	11.4007355025893	12.9633757177673	12.7419416887694	12.4101840034707	10.2463039189749	11.9078027360215	12.0434272945869
3.33x33	6.48x48	12.1484589146114	14.8455481205646	12.3697729566876	13.2038405776501	12.2255262872402	12.0671546770562	12.2593879945126	13.0618621566758	12.9115694243574	12.9604864877828	13.0790047786519	13.2785930354085	12.3933105746608	13.2079629012199	12.648472002578	13.0893258802736	10.9616224164126	10.9819642141103	11.0868726429052	12.0871899546586	13.5549541127958	12.6515476128417	12.643848662492	12.4068211480621	12.7417854714322	11.2821776709995	12.0815357053646	13.3167339088832	13.6117470223333	12.7411441793899	13.6181153615322	10.5830404421414	12.8035802024278	11.6159730113323	12.9311613167573	12.479359398623	11.0769372572025	13.2503085247099	12.2335453977986	12.2884178802643	11.7331594210596	13.2498834711857	12.9085235794029	13.2055603818997	10.4998274271533	12.1929135566525	13.6357966030592
3.33x33	6.51x51	12.755945672509	15.7864420944049	12.7770593643451	13.9169135227607	12.6973778001602	12.2077196478294	12.5720641901002	13.0284464538179	13.3662958593621	12.7754809694195	13.4129719674649	14.1195237171797	12.8017978034337	14.0509050954022	12.9357771316609	13.8593617818426	11.3888304930752	12.0959792493208	12.3279142193641	12.5675151084055	14.3014804828032	13.1031470265734	12.3876043688842	12.2997774370108	13.0213668253375	10.1998292142565	12.6922005184286	14.0041672012298	13.7901515945257	13.3083700354326	14.0814258155913	11.0368242261984	13.6901952506164	12.445004218561	14.1415788722476	13.099405330014	11.8027343442102	13.4596634058954	12.6112207973693	12.925476586958	12.7746675103503	13.731381758585	13.7770172751579	13.8373593579122	11.3028090756236	12.1274856008985	14.6946614115467
3.33x33	6.52x52	11.9954099971614	16.065092779066	12.0331817072626	13.5685347034969	12.523472401854	11.66706488368	11.9205229331603	12.4112251611193	12.4382246321571	12.2558676559434	12.5874883118119	14.2125747491438	11.905580876211	14.0881346529624	12.0841051799461	13.8016453004705	9.98781322412469	11.7137035134069	11.1385243636669	12.2922741183233	13.9463220241037	12.7951699480702	11.7451968906443	11.994711251214	12.9944842914215	10.3663207069818	12.0303268866644	14.0076304205958	13.25744820846	12.7064048810039	13.569533005966	11.8013282303307	13.3610289274442	12.4181367362419	13.5696442105164	12.5581347739224	11.6833953112954	13.5442419130788	11.8827699632703	11.9918480227194	12.0712957879426	13.9679408289125	13.5198678617803	14.1999131687486	9.20359690555817	11.7278904326396	14.7311409605638
3.33x33	6.55x55	13.3746279574424	16.4888332213047	13.1288721907101	14.7958635435719	13.1268736948292	12.6543033391807	12.9931672428242	13.4551146037483	13.9613962052511	12.8691307398752	13.5643272593962	15.6117176825614	13.1438334210382	14.3609227419411	12.6646654120825	15.1894990700813	11.0580263157582	14.0781891236053	12.8021761040848	13.6396485658539	15.2223252494486	14.6211719434524	12.438013466788	12.9270910107417	13.8394826854186	11.4382091692712	12.7352930472761	15.3890105594869	13.9432523465653	14.2305539597023	15.0218152698001	12.9919480833322	15.2834473859794	13.0459071359564	15.480875330549	14.1369542688657	13.2424455822933	15.0813637977472	12.8837796472929	13.5187945098666	13.7403265608937	14.8668891500542	14.6521935900397	15.6977100559285	11.9899212674646	12.6963512868855	16.1439193816124
3.33x33	6.58x58	18.1218939683467	19.997128268829	17.6853616869998	18.6732563041372	16.8581809516923	16.718341843616	17.4990183153227	18.3534534624958	18.6270845276441	17.3933773028702	17.9699006396808	19.8563850436075	17.3902811363129	17.7834652978546	16.3377144668402	19.2695422363895	15.1730871282017	18.4007421861185	17.0258047093228	18.2127869366552	19.2998369164094	19.0083309367235	16.6606576100705	17.4150496984648	18.3201093337349	15.6792671384858	16.6807912582107	19.2694556487722	17.4812639417177	18.6193962576664	19.3274386042228	17.7808973058167	19.4329593474592	16.9650427644613	19.9255635804862	20.2164027710174	17.90750934664	19.9243373541004	17.289385703373	18.0966375329783	18.3827886078255	18.7504863403593	18.9070480244802	19.8838972286622	16.3521868262321	17.1527558135712	20.4253723344276
3.33x33	6.59x59	18.316975214265	20.0256933462989	26.437501356974	18.4797671251561	17.0722611859121	17.5327101727029	12.014875529942	17.3611645634733	17.6857420822537	18.1019906363913	17.2080457344813	20.3417505146435	18.299622373153	17.7671766186978	15.4931656545717	20.5120976255477	13.9950101464772	18.1514734112689	16.7978533747619	17.8847178898634	18.5992110854197	18.5775049454979	15.2956027014302	16.0363644882498	18.2381519623014	15.6283683409369	15.1941555211206	20.1552312316183	18.1555265690643	17.8626771229847	19.4294835237584	17.521271557738	20.1098203373377	17.2984362877111	19.1325374166627	20.4172776099068	17.2957241247656	19.6962939915102	16.1632900734968	17.8052808177799	17.3185823322811	18.4551042262026	18.3698843219003	20.3705884794721	17.0807367815326	15.9624744009192	20.4998769264598
3.33x33	7.32x31	18.70654762376	20.1613382492334	20.1416664901393	19.5553879531959	18.6189926150692	20.2896284096087	18.5946971473052	20.6205946325512	21.7099526945592	19.0340774927497	21.2187305228187	19.5512424157648	19.9661941791619	19.3397100547035	21.2651236770445	19.5263266642756	19.2651345699946	20.3664706318989	19.3114566255371	21.8158403001122	20.5225891885015	20.6780723472958	19.8059355244836	20.3763781374414	18.2484041220048	23.2924139152643	19.9433697754417	19.9676258979379	19.1733644934842	18.6401034331894	18.4341064605801	17.9574377626654	20.6977965252343	20.1245701817455	20.3885509539055	22.3103487646428	20.2931927995572	19.8929147939662	19.0212463576917	19.8531373843028	20.7818692855094	22.4790057831747	21.7843115108098	19.0333215440711	19.5660453081352	20.1224080069956	21.5329807272472
3.33x33	7.35x34	15.6852150447484	17.031405138743	16.7592688086324	16.7624607680376	17.1468699476027	16.6293844143432	15.6137882975273	16.751017461635	18.0312283275433	15.2895593461682	17.5987735084011	16.0350933268254	16.1904128730555	15.6291777774776	17.6324768821626	16.1283910542868	15.4912828067917	16.3190326000042	15.8164713510947	17.5476542306942	17.1604234796231	17.0490400316264	15.9837393622394	16.1805706636076	15.9903711964419	14.6548212203356	16.3542705126215	16.370812685997	16.459291540039	15.1522438272356	15.9630970052807	13.9313347888851	17.2272915166604	15.408719804059	16.4591695416263	18.402246982366	15.4398378553662	15.9225848718102	15.7421095790875	16.5716623788925	16.4275482650333	18.114679185677	17.7806011709391	15.550273920417	15.592583717909	16.0434374745564	17.3004908022865
3.33x33	7.36x35	14.7513753935014	16.4058774224361	16.8023877469841	16.1822184511272	16.2254945379178	18.273266538854	14.8991518550554	17.1165619503451	17.3420439683447	15.2538787526321	16.9702908048153	15.6735338708282	16.6467861462806	15.1936289937592	17.3921109702072	15.6023874134698	16.5402834618999	16.4082913796653	15.8934121257834	17.8555215829726	16.8674148285978	16.8769984298157	16.2449697137298	16.7676400545813	16.0743798947269	15.5610818068668	17.1851953145724	16.1636266351336	16.0639641745118	15.8498749837341	16.3191246701531	13.5803253642908	16.6674181863899	15.5660772836319	16.6583635450785	18.8953101059496	15.6070653871892	16.6394198817146	15.0887922644591	15.5196647193166	17.4124807537582	18.0635192861192	17.5009986572195	15.3038815337809	16.9497499981563	16.748905785155	16.9237339260578
3.33x33	7.39x38	11.4901812866464	13.4213234816839	12.5377928679652	11.8856771367895	11.8975160853012	13.4879739397732	11.5170746719816	13.4445480771947	13.2121596644909	11.3633996233522	12.9611515306318	11.9316886483012	12.6236215485098	11.7628809821404	13.2253888033585	11.5511042762153	12.2441310430753	12.2583941036336	12.3011970962179	13.3172928555319	12.9997099583029	12.6006010174118	12.3104834998468	12.3957944481183	12.0067662174292	11.2542648804798	13.1236566931629	12.138398123311	13.1941953146071	11.81280157287	12.4389268427787	9.70605424464545	12.5647990035655	11.3839993411806	12.8327460038762	14.2756457297034	11.0886472123519	12.6336791949139	11.3246540786021	11.6839912273161	13.1154782223143	13.2138837969766	13.2070390701323	11.3458299387925	12.6254693378108	12.2883337357023	12.5487735655721
3.33x33	7.40x39	13.5219893506836	14.9245963429501	15.0269171156295	14.0432660375	14.2006693152119	16.424095317551	13.6640411299147	16.1449294207191	15.3644814100574	13.5435612377247	14.9539494783151	13.6534017372961	15.1682964435694	13.763738191349	15.2607479829791	13.1922914613042	14.7929110725374	14.6917109963408	14.2446007666063	15.6617696956634	14.6355786014766	14.828048556705	14.7976891777061	15.0051464504683	13.8117150998708	14.264692110242	15.6328935581357	14.1946365222925	15.3053183240336	14.1794251999155	14.3465166155412	12.150043662473	14.350271460847	13.256894885304	14.7180221837039	16.4379086869346	12.6065202970526	15.4370771197141	13.6170249687661	13.9098970520993	15.3199508484851	15.063282145668	15.6955276751054	13.3113861411951	15.4050651735071	14.9190567061058	13.9780838815626
3.33x33	7.42x41	11.4850307357011	14.3676164341898	12.0977679346233	12.0253361699372	11.5139843234217	12.072183770967	11.5928152318581	12.4736556790702	12.4275749444532	11.6274448611894	12.124197540456	11.6248133748461	12.3451103680769	11.4873342860735	12.6722466042924	11.3691048020502	11.2395464766155	11.1927685136431	10.5321240023084	11.5599413060794	12.3860381882182	12.213781396439	11.9831510463651	11.529036776765	14.1819341417171	11.0084234111884	12.3343976342584	11.6942930953521	12.0955622027254	12.1511485465367	12.6679246129743	9.69211999513006	12.1122472316247	10.7711685995532	12.1517414801336	12.4911947787231	10.5170835310936	12.0426928882206	11.5863688013113	11.6957735956199	15.4463752058533	12.1953604702772	11.8250552218584	11.3592727320018	11.6086263614607	11.2950807876704	11.7998102103381
3.33x33	7.43x42	11.1543288009633	12.9590411296515	12.2699086793668	12.1975201987945	11.5422151253561	13.903073221414	11.4675568016906	13.5372984380193	12.2664660762585	11.5872250776448	12.0571300897021	11.7021369416017	12.6953608062158	10.6430645962523	12.6241848053647	11.4484992903	11.1613492015974	11.7185429555043	12.516954661578	12.1807318745632	11.5377463137304	11.4491087426052	12.1263818594006	12.5308536820123	14.1338994619319	12.5074129619198	12.8502258735012	11.9055199382471	13.9872888366545	12.3048023145437	11.9337665889693	9.80081598643705	11.5964176364945	10.8542487073035	11.1728881225939	12.3427363659766	9.97951952751234	12.6059859193956	11.53616608757	11.5740650594335	12.4051023776509	11.9798191138264	11.8597691798787	11.2048382853123	12.7705784128989	12.8108057904255	11.8477302467603
3.36x36	3.37x37	3.85378800662413	3.81006089190186	3.82463710696845	3.85383678948655	3.86668191088949	3.81380413760329	3.82688920665336	3.80612690277137	3.81959853911376	3.85754261155985	3.82154850813123	3.80320930268109	3.86585307532503	3.82983733336026	3.80642220464309	3.80786514992325	3.80975406030363	3.81136379790751	3.79398010010596	3.8238573456655	3.79741978190455	3.83752068398333	3.79327589294531	3.83732015865239	3.78577601027847	3.80272284028168	3.87120213887108	3.80677619515516	3.88024457992019	3.81431933639542	3.80342122305695	3.79256759992488	3.81037452227468	3.8075615556416	3.8514842593473	3.80836001449443	3.82105378135404	3.79677415709705	3.86539778030671	3.80968371390592	3.84852452246312	3.88972518309456	3.84737014075849	3.80860972009472	3.80612808507543	3.85451968473376	3.80811567576407
3.36x36	3.40x40	6.57589248695567	6.60044551526637	6.4699827665922	6.6109020564519	6.39164000863628	6.26151371474981	6.42005552935487	6.57654810671981	6.84752583054639	6.28245501376651	6.61824493351523	6.76688724599428	6.00713392559214	6.21085839477926	6.34348342789669	6.38076366902897	6.20214720883018	6.31275312363789	6.29726369147743	6.72673092965669	6.71605814447731	6.34870089073347	6.60377732816606	6.2290606836023	5.98300008357012	6.29604590199277	6.26405787010306	6.41310361681456	7.1052992195966	6.2852552851893	6.89949106818757	6.21547190485163	6.61730708067867	6.34360733337111	6.61950050985722	6.0019225253247	6.28541502209679	6.2490230436445	6.71323617936983	6.28146073775838	5.91405816677516	6.77447547785067	6.89295894373382	6.35929406459553	6.14489658171722	6.26380507359544	6.65924064740117
3.36x36	4.57x57	9.4585892182714	10.7351663703922	9.7641046696561	10.538751776183	8.49495762202496	8.97081819010953	9.59414451631828	9.57054590919452	10.0161594436191	10.695177090633	10.1242708873281	10.4713625665431	8.97909989921039	9.27799423366926	9.8882852911918	10.2360884619077	9.81837512015099	8.3540426142078	10.221202766798	8.6403295076056	8.93138141610804	9.03408584196542	9.77669294802696	10.0417419305617	8.85636211996777	10.3225997210005	9.95332979459638	10.0190810955896	9.45247036493635	9.96543109955611	9.7877622570228	9.21832181039478	10.1145626203015	9.3056179268225	9.04263667300639	10.1735466283887	9.77632180321413	9.30629926447672	8.96204496752834	9.13794905873304	9.38775697384631	9.98075097374942	11.018973545662	10.2296620667547	9.52874094516164	9.84100797682839	10.4061061881955
3.36x36	4.60x61	14.4129382500585	12.9829921820819	14.4447851143587	14.8349618469344	16.6476326845591	12.7707685359966	14.810213367808	14.9174398942982	14.3066899036779	18.6030352899735	14.471403249167	13.9847208767283	16.0612478033308	12.7149330316758	14.4744640315281	13.846478397051	12.8852069443995	16.8887253219418	18.0126392014052	16.3124768505583	11.7866390883916	12.2670693321592	13.7282378330214	12.4672238289043	12.1608769831785	16.5566941446655	13.2900184349007	13.7425954608291	16.9939025535631	13.7159169944995	13.8690517339867	12.8494275747988	13.9415646180764	12.0465026459965	12.0412511808367	14.306750469621	16.8793597627398	12.7861015559865	16.5205422731822	19.7581453583073	13.2028766941148	14.1406280270715	14.756717622832	14.0380212636967	12.7116682225426	12.3331939496628	14.0933642541446
3.36x36	5.38x39	16.1956495701778	13.7723717637885	15.1045981740661	17.4568395192257	14.6140320924788	14.6560994128724	16.3617318459875	13.6333715932633	13.3461479461304	17.1099881355891	13.5058424764988	18.6124897313605	15.4506178517236	16.9656042922143	15.0613669034387	18.3503308144567	20.566899280154	15.0493642390634	15.1943139693768	14.8960401785172	13.9735754193406	14.2334773333855	15.0481819167632	16.0463436645237	15.0353244727209	15.9244136155778	15.2101654823345	17.7747772700532	16.3480826398694	15.3086189122337	15.5631568134489	14.6996904049031	14.7571604992288	13.5567091508227	14.1144485545841	15.5759190419057	17.0761985230906	14.2488566207959	16.1436645158403	16.8192791165377	16.5119710816123	15.7449611304696	16.1068566144981	18.4742152472033	16.799035388974	15.6910318972335	17.8147106347535
3.36x36	5.39x40	14.9712117412052	12.8581609882596	13.7111584485046	15.1949145769234	12.8092057521144	13.329615973463	14.7339017235761	12.3371194368864	12.5524079363284	15.6118146286715	12.529887908517	15.86785568374	13.9066698026523	14.6728429760561	14.2532565050938	15.6172844310399	19.6326755690609	12.7363062934275	12.7563213349304	12.3616341152778	13.9587558543016	13.0635767307426	13.1904660645483	14.400770048855	14.9933795389832	13.9832404685037	13.6851005476759	15.106528721053	14.6568124092519	14.1447173531322	13.7751766594843	14.0522329542319	14.349642643634	13.0654391047527	14.5036529881268	14.1321499425954	15.7988225510637	13.7964229421977	14.7063127261731	14.8213449457193	14.633888375958	14.5144105288503	14.2574672365045	15.9797264682472	13.8802807248269	14.1618541512049	15.410207363952
3.36x36	5.42x43	11.9041163468777	8.65208003892706	10.4488949176456	12.3474177057391	10.0733979371412	9.5271329370383	11.7362703615757	9.12294009626283	8.83732917798132	11.8189939504173	9.15068330781915	13.6305367099025	10.8872456571899	10.1614860133742	10.1643363777474	13.4452190387513	14.9924977905618	10.1291366364562	10.09055147155	10.3064687939177	9.44432723914202	9.15709260628067	10.4266054399311	10.7786663831849	9.77101402107274	10.8225851348003	9.88449159036518	12.5465704078844	11.8635041619245	10.933813698797	12.3179958597168	9.87195350475275	10.0538256897561	9.05474494395067	10.3522044995257	10.3185597347692	12.5333590469594	9.88836907684983	11.0386091968146	11.262915253166	11.0554001736708	11.1886059006473	11.2873519037904	13.4394308659258	11.0118351785704	10.5368288872886	12.6743668086418
3.36x36	5.43x44	10.7720732916185	10.365771847769	10.9437354226059	12.0040070393182	10.9879290132399	10.6072869764139	10.6777740189611	10.6522604643334	10.7014779353134	11.6480159683956	10.8990333975082	12.9771828221691	11.4377661280514	10.8153329121206	10.7574325933282	12.4359754744049	15.1415044827124	10.8764353075812	9.97020125173008	11.226449973166	11.8972291311885	9.65864535015134	10.6148149771911	11.3524179803247	10.9619319921262	11.2137944514781	10.9261261204509	12.2114240774776	12.5506708585637	11.294650105249	11.4186354263546	11.3610194084862	11.4375207540795	10.5309857563288	12.6126189984475	10.6100084825602	13.2933675944059	11.9712329774339	10.9595252634409	10.6372290094742	11.5935757210621	12.3298085548803	12.0101910059749	13.0400316717407	9.91278896174028	11.0648530943705	12.4174368933367
3.36x36	5.46x461	8.29394652743795	6.56096479185798	7.38315880907353	9.21199549500541	11.9057799828487	6.51355947236225	7.80618075629818	7.04186807601506	7.02234270026748	8.32397050691555	7.16283777563055	10.3390855495058	11.7921262289716	7.9562117241813	6.80815356759819	9.7782224867304	10.2264419032232	9.90567524200142	11.4544273972993	10.5077659376292	8.45209234450263	6.39913001899477	7.92666947715117	6.95695285308158	6.98371305252442	11.4629155540813	7.36038402530738	9.39574675052494	13.0320037599749	7.94454938936124	8.72963699130726	6.89456496089492	8.10763479690594	6.81533315399915	8.82546871276534	6.61303568718633	10.4125317766622	7.56461691032666	7.38990142018147	7.31344658830568	8.60234595909744	9.51165238010726	9.5668183843951	10.3712973633967	7.78270775501689	7.21880835041352	9.6016980269117
3.36x36	5.47x47	8.2768112217206	9.47779056531637	9.03470049309882	9.80072635063341	9.16614760954677	8.59822289778533	7.81839535966301	9.35535942655332	9.25882800358663	9.71232248229022	9.30861756653479	10.9732635984013	8.96650846204921	10.3610932338243	8.34632110573275	10.3178814685962	10.837490853514	8.73935838606016	8.51123504551484	9.54657231680565	11.9442667836917	8.4772299131261	9.20344354032772	9.28612238773537	9.13314546035483	8.61149174069162	8.7648049607507	10.0046907998199	10.4495828146391	9.14737809429566	9.14505713486799	9.21958323353068	9.04206984047347	8.96383121215477	12.3236869077399	9.06903225267173	10.796049138458	10.0314508422262	8.75390261540531	8.01442780240736	8.95786749176387	10.3525968239858	10.0677192551243	10.7773838198331	8.01902007729124	9.09868941111851	10.1824871716099
3.36x36	6.48x48	9.00536834338274	10.5905986610767	9.29089021568977	9.81189171362995	9.59015625524423	9.44657345284522	8.85448541700758	8.96592259614146	8.90960116952493	10.058292797488	9.02483024771103	11.0933480518733	9.37666470553363	9.95473334650406	8.97592167969396	10.6728346750055	8.06493112183855	8.79117176490142	8.5947775422055	9.24361606731911	10.3622432899445	9.33800069608051	9.31844740286707	9.49193584049113	9.17671406332354	7.01815851915586	9.29341428109175	10.6706630065802	10.9838937995594	10.1741617836557	10.4369975567689	8.59162761064514	10.1976363437808	8.65697718606212	9.80002704077902	10.2384350855001	8.29155715170558	10.4055221877616	9.20535724456145	9.09337440117804	8.5264929484519	9.48935630061386	9.09355749968075	10.569355136431	7.37972865354818	9.11977773851973	10.7091751783226
3.36x36	6.51x51	11.8450391725819	13.0099453111841	11.8991892160769	12.5618341415575	12.148394585294	11.6733869549501	11.5267638997249	10.7509213558653	11.2233728887532	12.053668404266	11.1196813803274	13.8842350167375	12.0213547073531	12.7145997184339	11.2613291400261	13.6031051234635	10.9283613593256	12.3051392921819	11.9049092814687	12.2285656149853	12.7234908338867	11.5645785915441	11.1980150473198	11.6624108142356	11.6670362131948	8.97125654521149	12.1222607627455	13.4244279580174	13.0910385760642	12.9412170215942	12.9112145439536	11.3033069055034	13.037438437055	11.3368766862836	12.7432968261749	12.9428166177227	11.3091324600961	12.7128908986115	11.7886425427188	11.946688788112	11.6828396376908	11.9085899249239	12.0621988874334	13.3742140329815	10.4915218152564	11.4755528842841	13.6416564976545
3.36x36	6.52x52	11.3069292913682	13.1471203310839	11.543352719206	12.4637739469231	11.8839406343182	11.6722095166254	11.0524580523972	10.1021225987413	10.2205775766343	12.0889980560839	10.1427274931352	13.9902175465573	11.3480192985384	12.6077830723724	10.196821563605	13.5816849102017	9.78075850841846	12.0901213806976	10.9399982175501	12.2029992215029	12.4871564817616	11.2535117185703	11.0483104138144	11.1047321894767	11.4701785513566	9.44863741499271	11.3758121028786	13.4582538614785	12.8554326648308	12.6261519870466	12.6893518352988	11.5221132610299	13.2679799894332	11.2962447299977	12.2849851851763	12.8806907035298	11.2935056116336	12.945111239383	11.2064118699966	11.3041633480767	10.9663167927978	12.2849076512606	11.7792340158433	13.7067701884871	9.0377560821257	10.8477269969335	13.6344225400271
3.36x36	6.55x55	14.5702632097022	15.1516542331192	14.4694148119404	15.3890677105535	14.3113735539256	14.4753054890044	14.0526745141272	13.1019971760034	13.6470459074483	14.4590423610971	13.0926216244112	16.7571358829604	14.5199908057822	14.7532474391234	12.9437022524469	16.3983044855253	12.7419639773467	15.8773329624342	14.2621666306351	15.2486571867821	15.1583339783764	14.6044625029475	13.6685746879475	13.9674297206036	14.1226128956366	12.6592197626868	14.1808018461581	16.3401687567785	15.3700210149498	15.7189536865531	15.6881476918086	14.4326338899038	16.6905572405477	13.6419881249032	15.7016932207963	16.0968859721376	14.5564975869884	16.084621288672	14.0756982420056	14.5656595113301	14.2796037059857	14.7950066576531	14.6680437005076	16.645148302133	13.4138905243781	13.9040949723454	16.541549171707
3.36x36	6.58x58	19.8363854066208	19.5134527954435	19.5611362144432	20.1338999699512	18.8407427932128	19.1200797592479	19.2011318937192	18.5007607681414	18.8586541407387	19.624992484075	18.0908889223277	21.5683197537499	19.4004359229374	19.0484673924177	17.4780237441194	21.1286436384355	17.596669997474	20.6780801816803	18.9594598551752	20.319840575162	19.9337669796755	19.4414580986098	18.6705299603412	19.0705661426188	19.2751291565063	17.4261847229966	18.885650240328	20.825078391209	19.6901415180288	20.6567968959372	20.581473683874	19.7725169616819	21.4625166278328	18.3851976600743	20.5295570580566	22.6177377515966	19.796104465273	21.3689208665295	19.1836351351875	19.8096504259919	19.5924126896102	19.5210393422072	19.6329782763594	21.4339844639302	18.1428469926856	18.9552334989575	21.2757049471927
3.36x36	6.59x59	20.3613958755288	19.5384837948086	27.6338463482737	20.3075429828426	19.2091363158264	20.3527729314705	8.98471201541819	18.1052584626677	18.4872348121616	21.1344460301187	17.9706342959841	22.2043034117263	20.7217708943999	19.2093588909157	17.0551662554195	22.4747146144284	16.7710739369904	20.6759122168769	19.2011462678664	20.3919712387008	19.6652141101998	19.3383069062418	17.9850950233798	18.1988068564947	19.3473238717917	18.0055578364015	17.7434211470054	21.9137346200961	20.6774720166659	20.3854100032352	21.2696234569397	19.6108726220941	22.4541354988341	18.8194912524223	20.2676347164636	22.8544032300124	19.4974944544164	21.3354463979547	18.4467777945093	19.951819039877	18.9972037416036	19.5797234658715	19.267575950285	21.9831247551389	19.4008521977773	18.2704054142211	21.6737339191935
3.36x36	7.32x31	20.3614705019063	20.1033973994447	21.3314688430028	20.6192553939273	20.247148786928	21.5796181847594	20.434549713659	20.7136830138921	21.5961719293027	20.5023351352962	21.1640659137133	21.3947453829205	21.2890189534417	20.8413078524357	21.7801439159616	21.4822140618699	20.8368606080667	22.1036719347714	20.8589602089845	22.5962263442372	21.0778968590322	21.1550286220558	20.9585847088967	21.6473193952508	19.7808154786399	22.5563314836433	21.6277346479006	21.5528046666785	20.9801758333909	20.5289004820034	19.6171361059661	20.6671308361853	21.8340809744766	21.6504791171004	21.1158022580247	23.5790012935239	22.3083890274488	21.1043842601484	20.4227700863521	21.2443509197151	21.9612690207101	22.21209377794	21.8419961770897	20.9088747664718	20.6605674171839	21.4509783692959	22.4004795707592
3.36x36	7.35x34	16.3101435309442	15.8977063125471	17.1913443627891	16.9435197642048	18.0864575027837	17.3062207890689	16.4292163233673	16.0650687206747	17.2513431650988	15.9350296203051	16.7528492502022	17.2247399399817	17.0178048231845	16.3040077894977	17.3104521893566	17.3545531201469	16.4796355845631	17.5162326999843	16.5136416940662	17.8951475545747	16.9773329177465	16.8132340137167	16.4427842228742	16.8155674896805	16.4155988315992	14.8735093706899	17.2324421948835	17.2341845469985	17.1631389320252	16.0919253664687	15.9816027356458	16.3240638628988	17.7709465701746	16.1541623428762	16.4794907991722	19.1656604373551	16.6526983399088	16.4588269630615	16.2024675589862	17.1056590635965	16.9269735629261	17.3898454564726	17.2108536975944	16.6755852071224	16.1629237454119	16.7029591689616	17.5685207117731
3.36x36	7.36x35	15.4975762298496	15.7911775685032	16.9500203539701	16.2618593340368	17.0441975170437	18.3336297006348	15.7084106770863	16.3417926189265	16.7327044138119	15.5057406466121	16.3824099875446	16.625841512537	17.1478541223093	16.0446941385618	17.3406587533461	16.6763515494247	17.337478507557	17.2798404217169	16.8658293896268	17.8068423365851	16.7842936103966	16.8589936828982	16.3525643249002	17.286088973507	16.8659772619318	15.35796819244	17.6625048619951	16.7881626451497	16.867192386405	16.7529355636557	16.3964643139916	16.0163956307279	16.9393451467287	16.6470746078703	16.7834916808154	19.1422921824948	16.7127509704417	16.8814677679401	15.5625669155188	16.0693249702656	18.0668636459127	17.2160739426851	16.8185198813689	16.2441073931441	17.1992909737582	17.1593853619528	17.1639894546693
3.36x36	7.39x38	10.9595222979836	11.4338425299634	11.8622034209501	10.9491545792358	11.9291577657436	12.9431523594525	11.1028213981852	11.9229854482843	11.9367049473462	10.5543094989677	11.6474030581928	12.0903497054469	12.2245497667603	11.4567852820938	12.3039009667666	11.856549160696	12.3736077600674	12.471906790864	12.3380936939221	12.7650585584242	12.0998145440333	11.769954715291	11.4069207501411	12.2293324838276	11.8878824439006	10.3008235593083	12.8456515988875	11.9990855484908	12.5468965883999	11.4788981178509	11.2249134072384	11.1836746644383	11.9947267163533	11.5857976850971	12.0035991685827	14.0436320444535	11.6307039339844	12.0517957997968	10.4629534549285	10.7821872085398	13.0568625251245	11.7927539616495	11.8672845251136	11.3749675164371	12.2143706755608	12.0917107557202	12.1647887774511
3.36x36	7.40x39	12.3243659877496	13.152732757872	13.5706366099752	12.2470084510463	13.4167169233013	15.0504541791934	12.5202769138706	14.0938447912555	13.7083658034063	11.6116727907739	13.3483616223116	12.965474962376	13.8700908792985	12.9253243286194	14.0205196408692	12.6693522328492	14.2512513836505	13.968862981646	13.4917477370428	14.1765671796807	13.4423802207794	13.6742332874644	13.0197927018828	14.074257387159	13.4325100409417	12.4101510466231	14.5515242156964	13.1750085768473	13.7681670893405	13.0078162656151	12.2884415203882	13.0238391037359	12.8556707331823	13.1529002505151	13.4740561821598	15.2065371468984	12.6132912834042	13.9826910857674	12.1788417347464	12.6701459344397	14.6502832054537	13.0327396198957	13.6851154909266	12.493508634487	14.3331306419777	13.8449613217228	12.9730107916397
3.36x36	7.42x41	8.67053989091798	10.8498234547849	9.32200370092181	8.67698167567502	9.31300526146099	9.91074411938882	8.75402598808114	9.23501840821121	9.47439375369211	8.31554435981193	9.07309985616823	9.51846815406765	9.58837733925819	8.93667415764948	9.83986300717647	9.29528116842089	9.4537110702623	9.12544760546024	8.62788282257009	9.0432203334874	9.7892888914364	9.6918501845623	8.87724709580622	9.33222813694565	15.5521604286993	7.75691962057104	10.0825354450158	9.32526771733659	9.23821730638547	9.58872379412401	9.3407394782212	8.88785317160449	9.32723206530212	8.95957878474206	9.53684518066641	10.5683730535972	8.59452087088047	9.45827827884124	8.67029071023573	8.74853233405467	13.5224793954363	8.84274584051809	8.64501278194544	8.99584659718028	9.34521016350087	8.92650889205853	9.2187342406645
3.36x36	7.43x42	8.83700005658029	9.88521097397522	9.58245213919694	9.09278010291682	9.68687472820827	11.6695583892451	9.13303306684039	11.0554327821212	10.0077097280047	8.13764898481128	9.84165987016418	9.52412751909591	10.3480977962136	8.6033421412844	10.646110557382	9.12076246812732	10.0572028914604	9.92134406217223	10.8261608153583	9.96783988635452	9.62280006027352	9.60644007944671	9.09464336848895	10.5968973289355	15.9576804705446	9.76315374251579	10.8093386014131	9.64245062211884	11.0340383812999	9.76289726464434	8.68903429616894	9.45382599797564	8.71882543694963	9.98896581233514	9.21304260274531	10.4185167370408	8.60995708467819	10.0655458371615	8.90063711202743	9.19628751181693	11.2072816061702	9.275284847378	9.40990573810386	8.85542579439295	11.1033123886523	10.7250794868849	9.46946682765191
3.37x37	3.40x40	5.58191311290314	5.78442227020124	5.64815810685218	5.31307594525055	5.22385480272949	5.1797469050138	5.4918184602188	5.47496347019777	5.76025928235874	5.19205989950039	5.54364383776592	5.36158689195652	4.59764135182378	5.40555473564	5.4153609297996	5.03268596278369	5.11687443660679	5.0043363196332	5.11921019298876	5.36288653618553	5.4518411568937	5.26833806811977	5.22374281526187	5.28409112336265	5.40643819903641	5.0655440971331	5.3436789761362	5.14433834423826	5.43680282886919	5.22603731329963	5.43103433979201	5.27688184442289	4.99914822744835	5.17842881577028	5.37482650882798	5.45067298597155	4.84840860489295	5.400119535714	5.09074532853491	5.19587037944558	5.27610661378256	5.65461669788501	5.66161831987993	4.93863959000857	5.13892372000208	5.47019652297794	5.29286037979465
3.37x37	4.57x57	7.54456055711663	9.74038074204494	8.09999512345532	8.78179725341003	7.0239984339406	7.76403741619011	7.60976767056656	8.63409317763018	8.79572595071038	9.34130151531359	8.749398722198	8.66956625212588	8.05213033923321	8.09003306544541	8.6099238091867	8.2695776192016	8.77302786955564	6.98249769065483	8.71849591386037	7.2034953321287	7.7062235238799	7.99692628451708	8.19284083819526	8.42949351977923	7.31701756182121	8.73696640716902	8.80100926030646	8.26829383851348	7.8346796998984	8.00478538125789	8.49114332702022	7.78226252448477	8.42728443806188	7.96277300944841	7.84570181691861	9.00492715128779	7.98065912064912	8.15828155925009	6.5551239500104	6.95431225931077	7.85480337118631	8.02968841238563	8.6326235293797	8.33378413447337	7.96884000341329	8.15389416168741	8.63023354261053
3.37x37	4.60x61	13.5366551629271	13.2897270852339	13.7181184569896	14.3054863251831	15.8878674151064	12.8646492762143	13.8782592928652	15.00481472728	14.2962416389763	17.7432010922494	14.2522637149331	13.4498562445849	15.5252920423417	12.7996005406419	14.3539498048447	13.2237533627938	13.0380178708268	15.9462763364994	17.1044913984602	15.5001138705495	11.6908778968904	12.5863238874582	13.2180903310577	12.1334030675652	12.012498366285	15.893268071734	13.5164989549809	13.286181731408	16.3099663396342	12.7692766827256	13.3230435336675	12.5244755578827	13.0602885879294	11.9302008784429	12.0791064652978	14.0968602532621	15.7887830436674	12.9641837768523	15.4316875616376	18.2737602589068	12.8304020981417	12.9502451328151	13.3105746682854	13.3218820367094	12.3288209493041	11.9809358983345	13.5553834693084
3.37x37	5.38x39	14.704606795151	13.5527952836306	13.7747537546048	15.9178474047215	13.618115765406	13.9443926364686	15.1139667195611	13.1461130757346	12.9879578841325	14.8960862309534	12.9494524208555	16.6992604926086	14.8281468835455	15.8252257803799	14.5642419988134	16.6238329515187	18.7189750253586	14.1624334773371	13.8842081517096	13.6998989777297	13.0386310247664	13.7906823616528	13.7955777334623	15.0540715090636	14.3017844341187	14.1205036737363	14.1069046923838	16.6154882564431	14.7374699999695	14.2016354339914	14.1630098849079	14.2386839630634	14.0855641704548	12.9701090974594	13.1754018155045	14.2446012229195	14.9820957145521	14.2907641853051	14.70771185467	15.2636486463755	14.5525459628204	14.0710072489499	14.0724384169909	16.7141351256953	14.9791209688686	14.7791620872091	16.8123690775572
3.37x37	5.39x40	14.1328863647876	13.2811278135556	13.0363898760355	14.3376817163724	12.6615201693951	13.3950821572695	14.1404940861343	12.6254426457055	12.8697979782124	14.0122812917811	12.8066998871684	14.4527207473195	14.0789747140905	14.3389239135997	14.4969655100645	14.4616988628584	18.3183456130733	12.6471826902279	12.1265360676493	11.8270845519934	13.3685507067894	13.4361072487533	12.5644177342207	14.1014025543561	14.4811228155831	12.8358689226713	13.4033405910616	14.5796716355342	13.6057488584789	13.5807247597468	12.9265889158741	14.3708138252501	13.9277193395042	13.1695434241283	13.9408655757094	13.6027478841593	14.2656533674417	14.4819767297148	13.9144062755117	13.8576280077075	13.3082357959273	13.499400690401	12.8950843735123	14.7858538475125	12.6375507911937	14.0694607217192	15.0692853845164
3.37x37	5.42x43	9.82773707422009	8.47655667119615	8.63615029975741	10.3281495922551	8.80889896638621	8.75903282332016	9.92977114539907	8.41151104142412	8.07832222679932	9.36876112407612	8.54937342733373	11.1971125742309	10.1218195004653	9.14214974718747	9.48367386617655	11.2561178920621	13.3921673376642	8.91327577268874	8.32775155729324	8.49350116265371	8.36252904329785	8.67559346673184	8.51623443782521	9.81651124381774	9.08316305039164	8.67740491160808	8.79818981381966	11.0000599998364	9.69851973241278	9.28606709000102	10.1470246377941	9.57566086492207	8.72596590641976	8.2193938340975	9.13946196447034	8.92831299854569	10.1941207075451	9.99069752319627	9.18261754621197	9.32503930286624	8.60259344616493	9.24172581285552	9.13044883891258	11.3137267953579	8.75201925272105	9.71253051475258	11.3315203304764
3.37x37	5.43x44	9.35998402776415	10.225492359784	9.77370318763569	10.7003598537619	10.5985497592831	10.4270090150532	9.53683820770804	10.3759071410648	10.3811735849084	9.65816478426414	10.8496616537107	11.0754616608067	11.4472844814829	10.5895060319167	10.7428313772487	10.8370806493262	13.8746760682907	10.3247564135916	9.07306739752329	10.0169207843528	10.8113557891691	9.73516065609604	9.39641043164889	10.9749861958911	10.6883340610219	9.75010302509671	10.5065786058069	11.3201325522275	10.8658426732583	10.1739296734349	9.72935876612637	11.5670708911115	10.2086444251918	10.2168182914252	11.4708031540952	10.066011821968	11.4812667419584	12.3081635104511	9.68612998054435	9.26074743203809	10.0153702377895	10.9428002357715	10.5699446072342	11.49338305287	8.31888658415295	10.9721962250044	11.747437763189
3.37x37	5.46x461	5.33494526682327	5.71918272133353	5.0369722056013	6.44471822502738	9.71239156953631	5.21790638091563	5.09444962679974	5.49971071966517	5.45974852900754	5.22282050237226	5.85454695087502	7.41525973921346	10.0476933173739	6.77926817584317	5.45018540969021	7.09279338483788	8.7774541867218	7.4408366465069	8.78580502856739	7.59771742038357	7.13839015464972	5.18771703160457	5.18888514037457	5.91489399735955	5.92541677859035	8.45520798088374	5.61106291178418	7.18395684842274	9.94742439026304	5.44132456300853	5.71176513872901	6.46789401582926	5.35281682854925	5.35387158979369	7.49230999091735	5.35141747577219	7.44716657528217	7.03830910091337	4.84105474044655	4.63577318254464	5.70845732225441	6.77921035224605	6.77623796807639	7.73429149954927	4.6665845111816	6.12521362892757	7.55648105932914
3.37x37	5.47x47	6.563168289782	8.88783494446201	7.67710401127925	8.133298777249	7.75791602171614	8.36853398152867	6.3967268974062	8.70595072349942	8.70094437403205	7.57646058526011	9.03393945076012	9.0166637399872	7.96844062536705	10.016315140809	8.06591110786624	8.71065445302476	10.0362406308338	7.49955792030437	6.52525026339986	7.7612739933596	10.846883976516	8.23130329899221	7.56454274890426	9.07805601436783	8.85051038076336	6.38328606596947	8.42045877610003	8.93994121904613	7.92087854975696	7.84834874352561	7.07510035264518	9.60663739296951	7.17380770581425	8.66398493766004	11.2256600696796	8.75997568489776	8.82492090616114	10.2504167720147	7.34710249009771	6.72882939299251	7.43643375550404	8.80989551583899	8.51136898506933	9.17973605285032	6.30111418718944	9.15170339335798	9.18667807207807
3.37x37	6.48x48	11.1040953255995	13.1276931713077	11.4068797661762	11.5875433548272	12.0708790069323	11.9241629475616	11.202257317166	11.4444986784044	11.4671519567851	10.9895536306076	11.6620412449965	12.0222774048847	11.8439279379773	12.7597997633192	11.9776589532346	12.0726012524228	10.9313282815951	11.3647375244658	11.3212943606286	11.3370388991129	11.9938898194039	11.8642444344341	11.1213872336143	12.0511397801204	11.7621546070437	9.12911331948509	12.1638990870526	12.5081651731979	12.3769516844819	12.1607720149668	11.906998068363	11.6129157406743	11.6832206604172	11.2910081480796	11.5807815366667	12.6120049555969	10.3878823636004	12.948935786388	11.1151781812079	11.090117312274	11.2083930605596	11.2912552446573	10.9362672333845	12.0073820627146	10.4632717636502	11.9024444548168	12.5791911504675
3.37x37	6.51x51	13.681765565891	15.7767545775422	13.9082968403755	14.3004417763928	14.5229643668226	14.3105527845713	13.6940201913098	13.5354204958693	14.0291733897618	13.0789948008247	14.0105756127291	14.6266453091609	14.547430460394	15.6926724938743	14.2611789835203	14.7693481237325	13.6151094744038	14.629373773337	14.2628235633762	14.2272184913285	14.3733925709973	14.3675953102807	13.0262381753137	14.2946839769195	14.144258411101	10.882459326825	15.0209086942169	15.1620960622204	14.6566081001028	14.7876871078611	14.5072279226598	14.1372743483318	14.5273600148134	13.9658263629475	14.4537469536449	15.2991848802477	13.284230086836	15.4863439520114	13.6047486195078	13.70788280516	14.1060754641396	13.4825970050284	13.5627445968727	14.5474171246995	13.2466699588991	14.2920459696994	15.487485690066
3.37x37	6.52x52	12.0509190520889	15.1191941914905	12.5077828970605	13.1431069005772	13.2905336235984	13.4065927438705	12.1687892577692	11.9522473618981	12.1467600206804	11.9371345389084	12.158839089321	13.7212275689896	12.9386913557747	14.8255737157116	12.386448805045	13.7413695823961	11.5386788238515	13.4711272356845	12.3649299229717	13.1701467341864	13.1116875344099	13.1589141269331	11.7599277633836	12.8153337451664	13.0030430284607	9.97361088071918	13.4365981185715	14.2377510864602	13.3667103282745	13.4866561459837	13.2666785971471	13.5297633756101	13.7456815400329	12.973408650004	12.957458778634	14.3447198299583	12.184674349362	14.9141150927569	11.9287271324312	12.0003332037073	12.3946411404284	12.7267871043716	12.20419145212	13.8778556340668	10.8930005049114	12.7690234943789	14.5542550822775
3.37x37	6.55x55	15.0170120197062	17.1290616789128	15.7095056574037	15.9988082993703	15.6097351034539	16.2610569459676	15.1633037297286	15.1173031986529	15.7049458133417	14.5111040586166	15.2381342033728	16.2983575246097	15.9759677328167	16.9725935554941	15.0727359825614	16.3268261153232	14.3014667079989	17.1223587744212	15.4656393336971	16.1035962132686	15.9472752531585	16.5979519820971	14.5328594571062	15.5545948516829	15.1894137806566	13.0565844691481	16.2219012757445	16.9106969105357	15.793859756247	16.5605664456262	16.337902282729	16.2391231906159	17.1469514783241	15.2829373158434	16.5207513448995	17.4970905581471	15.3307815195443	18.0433346696225	14.8018738340793	15.2838013923238	15.5818936910762	15.1133859210966	14.7702000324979	16.5679953524861	15.0348561682512	15.6487961517811	17.3281181320996
3.37x37	6.58x58	20.2432171850227	21.3685365900428	20.6596541355367	20.851589339904	19.9362429760474	20.8413986574798	20.2849217154023	20.3620832676816	20.822068989416	19.7885507554242	20.2146504050899	21.1967083765381	20.8661281985902	21.0946582337804	19.2987482495627	21.0487972815551	18.8079935399819	21.8312715616842	19.9749153940636	21.1589623091493	20.7478328747848	21.2341475458753	19.2630073197307	20.4918528444843	20.2039146701821	18.1026599426714	20.5388446851326	21.4093202834653	19.9979559705486	21.3418350195104	21.0577230013124	21.4123859016225	21.99840235108	19.8235359106291	21.319685691867	23.5437063564767	20.3864404936222	23.2048065064116	19.5763607700716	20.2118611711045	20.755467665172	19.8615218198405	19.5206819809145	21.3773570396342	19.4702735984885	20.5260220451991	22.0346714066718
3.37x37	6.59x59	20.0465205459701	20.7401143921628	28.5356115231477	20.3084685784034	19.5514951602173	21.444503211779	10.7130474189187	19.3851281656841	19.8728263213867	20.7823125277241	19.5176115342016	21.1813870414569	21.5448158265509	20.599420647193	18.1647665000131	21.7509198426182	17.2361789559055	21.1585468782712	19.5196088844013	20.5445840551713	19.8644896486167	20.4874346612747	17.9477008276826	19.0088038813598	19.5542228943009	17.9164201223347	18.7300897488506	21.8391998479798	20.2611564082606	20.4318981252355	21.1289947465562	20.5944608572305	22.3487797653474	19.5342840667376	20.4624969639582	23.1749044658225	19.3780963461327	22.5751740414111	18.1270843491169	19.6638659728956	19.5065889124675	19.158799362173	18.4061893394586	21.2593451921737	20.0411563788121	19.1834664229383	21.7876635048369
3.37x37	7.32x31	22.5955539653269	22.9929475057027	23.8792146855796	23.1502764346346	22.4622455912137	24.6543851069135	22.9173766605168	23.9481135373958	24.9629782878566	22.4649064320331	24.4602281469327	22.9534180679044	23.8016622108625	23.791325414949	25.0579896041163	23.2999922746768	23.4474649802489	24.9411612199593	23.2489684932472	25.3359607277877	23.2097717567407	24.087992133011	23.3515743580599	24.6631114622628	22.191482712969	25.5587432202759	24.8414653754564	23.8937731218826	22.9480105455789	22.6442062126275	21.6086536831891	23.2075755304168	24.1967856129693	24.3301796335333	23.0915436036658	26.5288818460183	24.5989246309671	24.17967115161	22.7977753739263	23.589226227242	24.386456938227	24.6615004815198	24.0743257849519	22.6587914946936	23.2631990276488	24.6396181179823	24.7748169720787
3.37x37	7.35x34	18.6407481609511	19.0050010786635	19.8021875054248	19.4645691963629	20.9887606589813	20.5080118002697	19.0090458992554	19.3543393325631	20.5810163014366	17.8895459416945	20.0583386400768	18.7614198556506	20.1478119159377	19.55025738961	20.6718935997649	19.1686696721499	19.3196283866952	20.3897166728721	19.2473305421817	20.5753320507835	19.1506148726353	20.0347909647193	18.8595290238118	19.8968649289279	19.1080758057948	17.3265947029415	20.5208872615197	19.5843002938578	19.4225592031534	18.4298433525627	18.2287190169798	19.2862402764251	20.0058138549773	19.0635091732871	18.634802655247	22.1181860467806	18.9161751419255	19.6035543970985	18.5959333995366	19.4156944248719	19.5866825419722	19.7642710718104	19.4216867959506	18.4587749864394	18.9759726759921	19.9207249115086	19.9601435115081
3.37x37	7.36x35	18.3443845086173	19.2492006327536	20.0644643337419	19.3141604270028	20.3472583411132	21.8566410960147	18.7606802915033	19.9606645680949	20.3641318498973	18.1538195980901	19.9996552470286	18.8553859944579	20.6711147498145	19.569583899511	20.9450055621859	19.1208873748056	20.5999709951252	20.5660142224982	19.9577130954426	20.9720137564326	19.5478931089772	20.4276310178151	19.3304251893227	20.7488611253726	19.9590920885696	18.3974430288559	21.2875728536628	19.6958509844079	19.6629674515318	19.6107278294305	19.2040046604868	19.284298690904	19.7346690876741	19.9296302524658	19.5400992320919	22.4812034820203	19.5042298232973	20.3904572288117	18.5196773460015	18.9030711525932	21.1700918042412	20.16550832486	19.6176949206577	18.6871607527735	20.4482542286622	20.722057957645	20.082445294336
3.37x37	7.39x38	14.0126418993707	14.980462843317	15.0454863331167	14.0290378857568	15.3508678582027	16.543968659303	14.3072987667134	15.6009811870921	15.6061038058831	13.1885745249439	15.3283628936687	14.2988514573724	15.8473962845636	15.1134228088809	15.990731346627	14.3036318814489	15.8107807207614	15.8715753786447	15.7160752416117	16.0358801754067	14.8998059383336	15.3975247686113	14.5317961381242	15.8319861356685	15.1198579689096	13.5846273780329	16.5223703202658	14.9417245657923	15.4447934269125	14.5416668233047	14.1072284308435	14.6560938179312	14.7711960585458	15.0469670365825	14.9245953378978	17.3802352976017	14.4848302026638	15.6777698669167	13.550397890837	13.7389430816202	16.4183100835622	14.8423228640264	14.8708247585667	13.8989587379775	15.6601252868551	15.7539600418435	15.0234061717042
3.37x37	7.40x39	15.8816241927581	16.9225597059074	17.1301512836285	15.7900668142982	17.1610751411443	18.756473895698	16.1538271316738	17.7979844083537	17.486680245261	14.8433065723241	17.1446117774652	15.8394636904158	17.6712197937777	16.7500937609316	17.8255350831329	15.7791202859982	17.9591835560529	17.6654139209926	17.1829263514688	17.7608394508818	16.7442208836362	17.4636038949582	16.5151664236241	17.8592067293035	17.0362150139049	16.0122637375232	18.385771264758	16.5735798788312	17.1213013816123	16.5023977651734	15.6584625682089	16.7370598373788	16.1691513073507	16.8934152260577	16.8843270816459	18.8309514895026	16.0125531068596	17.7086203302234	15.7412401671533	16.1094310886511	18.333453166275	16.5675298098419	17.1209711465209	15.6540897531604	18.0346999143318	17.6789561909068	16.3682823167246
3.37x37	7.42x41	12.029722191306	14.2620237343794	12.6732176656128	11.8456069916235	12.8755806859341	13.5511565927046	12.2379170613303	12.7185689053447	13.0413640390873	10.9159011080167	12.6541599484122	11.9473488691006	13.1501300373799	12.6110859564115	13.5169705925551	12.0208577480977	13.1170250819307	12.822381760032	12.3635323835868	12.4974152927715	12.7423695598582	13.2175011632305	12.0413986729117	13.009025866682	18.5596926159891	11.3249184103021	13.7492693987717	12.3997551991965	12.4035119623436	12.7658309561109	12.1499268722079	12.6183042838568	12.1684681040795	12.6226143488582	12.6015438339911	13.9661562715015	12.0680825734663	12.9314844468839	11.9390599713713	12.0184445749024	17.083571465007	12.1374652213714	11.9734339685823	11.7551018711026	13.0775955741107	12.700911817661	12.3597052553853
3.37x37	7.43x42	12.6500785768311	13.4888680029126	13.3494056047451	12.8155748212868	13.5417011117511	15.406678065047	12.9503990672102	14.6392743672629	13.6885302717275	11.6280509114813	13.5023009150293	12.8062062297934	14.1472998130385	12.3618852122158	14.3384854151336	12.6013320327654	13.8551018040287	13.7283680749024	14.6030469080942	13.7661977684472	13.2019886380803	13.3522756861892	12.772127857174	14.3721542226627	19.155597145482	13.5571637889346	14.6318049809311	13.2852490755725	14.6430894622685	13.4506851498353	12.2129289689247	13.194022320733	12.2724896007289	13.786001124329	12.8913299934491	14.1799860719255	12.364898584299	13.731492744782	12.6830272805825	12.9420719361314	15.0497253795543	13.0819283364495	13.1784635295622	12.3769851741044	14.8940322612783	14.4953698814484	13.1462692426407
3.40x40	4.57x57	13.0299090557072	15.5197016723905	13.7020587139305	13.9420088581237	12.2018780931462	12.9074149619511	12.9861248261366	13.9760013594733	14.4963435389756	14.4945033029766	14.2159827307155	13.8002332226669	12.6420381663718	13.4928408054049	14.0080429039891	13.0704282255785	13.8853578275823	11.9159076867858	13.7791887279332	12.5046847621202	13.1227393862715	13.2542538077404	13.2939277115531	13.5900284767914	12.6623331183475	13.71642216469	14.110055031785	13.2507413377516	13.0590987820753	13.0959653710599	13.8320422570205	13.0472690629112	13.2037172038786	13.0918992892552	13.1772624243429	14.4299710671921	12.6454865465904	13.3696619628172	11.1395070806567	11.9479647639253	13.1141339401426	13.5277672215336	13.8360337163509	13.0533180839203	13.074064020036	13.5036382504864	13.6995284590383
3.40x40	4.60x61	19.0505350318567	18.8281638244413	19.2250343562762	19.5509206688585	21.0450866474814	17.7413894889887	19.2569880562875	20.3271375259774	19.9566063748324	22.8692406738833	19.7213273894026	18.7170934976561	20.0232943593206	18.0032384309046	19.6982851284065	18.1441517024081	17.9526204772451	20.8698972445961	22.199020090986	20.8095631381344	16.8274869781557	17.6187649113098	18.3942957734185	17.0222927069182	17.0188680293373	20.9524605476302	18.5715350200246	18.2954341845172	21.6607255880314	17.8170710555916	18.651161813678	17.5793095996401	17.860221751143	16.7886706442172	17.0923586728105	19.2690690226591	20.5258860466485	17.7887488598833	20.2773101026739	23.2363704781965	17.8580452737695	18.3395357901993	18.6970040380805	18.1469466853242	17.2888452766517	17.0069871817439	18.7452536392549
3.40x40	5.39x40	17.489259418283	16.5055132910189	16.4416705051525	17.3420575768852	15.6163464997419	16.3476704150775	17.3408614837902	15.8669242451081	16.3141299185706	17.4562370801957	15.7886310046185	17.2393539032065	16.5232187239654	17.572092334153	17.0497125195705	17.0092851701651	21.6434406229694	15.7166686673735	15.7466811106341	15.1005985642954	15.9579133974339	16.4328850175494	16.1354494204531	16.6007007382219	16.4464256907086	16.1766517549213	16.7007659105803	17.0048351947321	16.9857060200629	16.5784752917752	16.3236732692124	17.3692032056741	16.6621405887719	15.3190120112232	16.3883922640386	17.1709972337078	16.7843577178276	16.150641380453	16.7512335665168	16.8926178847448	17.1536048980965	16.5229420201125	16.3428045022878	16.9907997163171	16.2235911252719	16.5948802647082	17.3887149899008
3.40x40	5.42x43	13.4455524988749	11.6985132388693	12.0910671985561	13.0362845166865	11.2684798442381	11.6194940509473	13.4392050732177	11.3838104780429	11.448817624541	12.8404910731638	11.1078617654344	13.4881699277552	12.2591320247398	11.7884844657827	12.2003653223992	13.4454034524814	16.7767620833104	11.6670411416091	11.7246544938433	11.3778360860051	10.7239929130898	11.6902370378021	11.9003473058562	12.2846588068208	11.8401549398646	11.7124583670551	11.9009153009338	13.0599802832929	12.6431653473329	12.3791001288462	13.3040167242829	12.3687665108531	11.7618031780846	10.293334445164	11.3615793356382	12.4571793356281	12.2830921595501	11.3850494070074	12.0844406159325	12.6570769532306	12.0706280284002	11.8754835691015	12.0204716213633	13.1378420221892	12.1403644096872	12.1206983709686	13.2331552548891
3.40x40	5.43x44	11.754968694131	11.5893555040822	11.5464608430462	12.1824089982236	11.5997311175734	11.6863914447532	11.7464980738942	11.6090085709332	12.0381931368457	11.800070042165	11.6951479255288	12.1886271991558	12.3709209843083	11.5857908664018	11.8214184428096	11.9237846760163	16.2831586616357	11.6190946721334	11.1504003963983	11.2934737791346	11.4369706653467	10.9823222043428	11.4414269214989	11.8300644546004	11.6872284567386	11.438757450003	12.0229183229364	12.0780485178691	12.4443006231769	11.7428480787243	11.6837462314105	12.8875793305027	11.6850270859763	10.464050315246	12.0180561240161	12.1007727852398	12.3153775419189	12.0616485606239	11.1796888149894	11.2135194296884	12.2755724102789	11.8608077718172	12.0164511816093	12.124651458908	10.4192290021863	11.6931850237649	12.3747730888287
3.40x40	5.46x461	8.01035648395251	6.87689566592369	7.11709891739605	7.81666968727731	10.0478639023426	6.33568031074801	7.8956116292533	6.5480794894381	6.77679075964427	7.2617289952187	6.35031613386294	8.05798914121879	10.4672138126629	6.93526199937681	6.84202375032417	7.81255259182298	11.6958938948675	8.61370849286183	9.96912157614702	8.57452144437228	6.47060569035079	6.38399921679194	6.9224306424839	6.47609326677743	6.91753351997661	9.45009296250571	6.96732933052543	7.74335618449778	10.8901473360097	7.11410465202755	7.9019179317429	7.56065903212147	7.45556563917185	4.90720409194481	6.95173942261935	6.75144347528734	8.12377375361968	6.62555476922499	6.48685278081752	6.73868295737379	7.75178637476549	7.49600433564442	7.55408743661337	8.05045004953139	6.78481289351446	6.50043844675111	8.11986409984798
3.40x40	5.47x47	6.74197819634564	7.64396500515276	6.90135856190649	7.36364101515005	7.03360604526583	7.27677476633708	6.53205274014226	7.48472878600153	7.78339861500103	7.19383270586688	7.46777055084046	7.87095095906461	7.53451511379465	8.33665610421829	6.79365306738576	7.6565799806441	11.4112797704727	7.21891272976755	6.87265349046495	7.20749873395758	8.88186196695265	6.88959824663238	7.02302513166513	7.50827370305585	7.39125131489926	6.59138741085669	7.75415675621792	7.66817592390785	7.95960840745322	7.26500777700891	6.91692771394931	8.82253886361517	6.90416439549349	6.27813236560044	9.44193137022294	8.08376607776351	7.95549426497185	7.9937137176659	6.49033211785037	6.20069221942196	7.40626991136564	7.48804841063411	7.50933099550153	7.88159901289072	5.90771470198079	7.4955728933818	7.87089607351031
3.40x40	6.48x48	9.94672111803684	10.6896155683916	9.72905822780396	10.0772576130612	10.8381464743747	10.6743076590475	9.82152763066927	9.55818795588369	9.72596632731165	9.21588568722508	9.78306112625287	10.608988076155	10.5947354379428	11.3336030458103	10.5740146585864	10.6609951224077	10.1777703845194	11.0030178133092	11.0314526242014	10.5872267851407	10.1863799752415	10.0023524233052	9.94355313758618	10.4059752546314	9.97304702686195	7.69390479535587	11.1080122434214	10.8855484473682	11.2528676345188	10.7645422568728	10.3040314925761	11.2360048949794	10.4651332528545	10.0115835910209	10.1349731622733	11.4469917882385	9.86359863335892	10.7767509482218	10.105486133779	9.81957417610356	9.7137027955358	9.94950375646947	10.3045816508968	10.6374031135423	10.0938443122529	10.2864951271072	10.8644462813344
3.40x40	6.51x51	14.1815115202858	14.9726044494604	13.9870464716465	14.333370957315	14.8257962012163	14.6529436291825	14.0404766656976	13.5948306719871	14.1935202469296	13.1921137426873	13.9390136666839	14.8955887765472	14.6428522836229	15.7468599409533	14.4803328691021	14.9640263298352	14.5124627131304	15.6722432663611	15.1450359194028	15.2257039902922	14.2360745291671	14.2234748567289	13.5940996759624	14.498240065608	14.1108456869176	11.8514227837842	15.4983812380519	15.1372591310316	15.1935042040999	15.0239660542747	14.6526308900484	15.3378796448531	14.6230998765652	14.0481994931735	14.5948863990098	15.6753099490887	14.1582170134519	15.0787594317305	14.1318493128111	14.0378115815821	14.1275239868846	13.9406207896205	14.7474258431768	14.7485136200229	14.3269384726815	14.5737428960442	15.26715854375
3.40x40	6.52x52	12.6781923001665	14.1655446065444	12.8077662767557	13.1168357083559	13.3557695023537	14.0840248863739	12.6266533174868	12.176051330378	12.4688684330215	12.3563426223135	12.1393875875186	13.7395296862738	13.1397977153379	14.8770281306449	12.6004657056793	13.7350849287509	12.7647618465837	14.4623136115906	13.4232926288597	14.0909699098394	13.0865794614177	13.1062097114307	12.4649725230343	12.846909978668	12.9856284407032	10.8030523927268	13.9747063654304	13.9929403986439	13.7876180683975	13.8097020243016	13.2988268279574	14.5272461602328	13.848318814932	13.0801758780224	13.1754290252728	15.048087287094	12.8280231914352	14.4317235976858	12.3019368800202	12.5530686288254	12.6851877400376	12.9737138090834	13.0772953243398	13.7142857633929	12.6141769846471	12.8878644856314	13.963566807947
3.40x40	6.55x55	16.9185523612394	17.735441945438	17.379565299512	17.1599791083789	17.0667632842317	18.1852453654054	16.8844448531777	16.782781086578	17.4257292530327	16.1793290651992	16.7389314175069	17.4640152313264	17.2470071896547	18.4250768790798	16.7893339355675	17.3600427130811	16.6631869100722	18.9454099454195	17.5038969661044	18.1255462538374	17.158310639454	17.6974867707254	16.5531637157372	16.9752488641551	16.519502080874	15.1131765357254	18.1449955635156	17.7897387558109	17.5780122596385	17.9779866225337	17.5173635287962	18.4387053233138	18.2046638529801	16.6990218276401	17.960886754278	19.3220333816087	16.9825674148522	18.77240466749	16.4269475253317	16.9398476380397	16.9227295079724	16.6988237310297	16.9640025053052	17.4075073746933	17.4779313707315	17.2228789985879	17.9236881528328
3.40x40	6.58x58	22.2080696144442	22.4921085939047	22.4405050522487	22.4434113717144	21.800873262326	23.0132105104872	22.157262172931	22.0627031435407	22.6404976535411	21.6279917005717	21.8387029834649	22.6376550464044	22.3156050780614	23.0102978251043	21.3899201027026	22.3875478558953	21.4863202293925	23.8219739736236	22.1085548148222	23.2867808423577	22.3240320954795	22.4724759205567	21.4939853447424	22.1189735295289	21.7262211624571	20.2261995935964	22.8333381703158	22.5788350895258	22.135862621547	22.9392325939644	22.3634039001222	23.8390431854972	23.3446292966926	21.6547869303764	22.8237637124117	25.4417882429675	22.1469515283707	24.0356528099405	21.3424296882993	22.054929086261	22.3303594910606	21.8729718831255	21.926553833195	22.4708039242035	21.9344279387451	22.2791963275159	22.7559334460268
3.40x40	6.59x59	22.261184200307	21.9409149307863	29.2583791929765	22.0979964702685	21.5330367575036	23.9280904796016	9.50545027865593	21.7086712859171	22.3019836113293	23.2028259916761	21.7821837977738	22.6822095264108	23.2389728473528	22.8037531340786	20.7070516974291	23.0671240946937	20.2938474666585	23.291879572074	22.0157158866115	22.899127799984	21.9275489966389	22.1416473867687	20.6780202147111	21.2194711998202	21.3907134289626	20.3909284486999	21.4690829566612	23.0906009233194	22.4580176774354	22.4469073816417	22.7789569778776	23.3630583186363	23.7182479538435	21.5587754986224	22.4990321125154	25.119807264388	21.2835203385154	23.5799301949773	20.1512023214497	21.8681538772709	21.6754809404543	21.3738683677055	20.793690100605	22.2751420870889	22.8587073562789	21.4932368432491	22.692105896104
3.40x40	7.35x34	20.1712687255909	19.5728032483852	20.7882488439984	20.6914529697651	22.3113222602337	21.6002494892999	20.5147547389678	20.2600672753078	21.394650055563	19.0337130901987	20.7526722616631	20.3946875680899	21.180900665458	20.9008273998902	21.4738889118855	20.5762034641962	20.963997448006	22.1037476460441	20.7705619567695	21.9496311814117	20.1013047835209	20.6500147457575	20.5044042585977	20.7926127506862	20.0331622316598	18.8913245962267	21.7697445322631	20.7597110047322	21.1655583200633	19.7022204839962	19.4652491121999	21.672755200943	21.1246453934735	20.3138278273692	19.9039656852598	23.0297077271945	20.7976226526014	20.1864288570316	20.0196650071873	20.6720284684401	20.4270650363678	20.9509063527094	21.3803879758998	19.9558645766101	20.7266807279892	20.9240983318278	20.8774300621508
3.40x40	7.36x35	20.2112077076062	20.2215064720708	21.0781834843518	20.759266003402	21.8274908544248	22.5400952526825	20.4680485391256	20.6922691119171	21.3293387848756	19.29472223174	20.9075778845853	20.5784362136679	21.6760425585484	21.0222290920825	21.9833365529439	20.697878586947	22.1501122570519	22.2788849137474	21.8310557005382	22.3025246328751	20.6523818723168	21.2379052403951	20.9693817505429	21.6358850292749	21.0980623517896	19.8476775719478	22.2621240900324	20.9548511567131	21.8400187270982	21.0638911410024	20.7953955720972	21.6163953054157	21.0879558753332	21.4594496434554	20.957542938045	23.1380704899955	21.5521062775776	20.9320597409811	20.3098970209108	20.3901358994981	22.0236499699755	21.4080252242004	21.6301131758482	20.3418634839584	21.9924236499755	21.6337820087011	21.2736276643172
3.40x40	7.39x38	15.3342934953	15.1477101239758	15.8281169126337	15.1877511172655	16.5966819274215	17.1653924219634	15.5283690708329	16.0744745170721	16.427543303854	13.9918486269685	16.0417338838419	15.6792965084534	16.6328352664241	16.0713768856312	16.7384693744679	15.6258868868298	17.1984062924447	17.4226772626942	17.2666922715383	17.4138555466617	15.6624154267469	15.9002151243309	15.8739752425157	16.6025458891099	15.9810484324402	15.0521547959088	17.2660622609789	15.9543385948776	16.8234981201889	15.4946324254562	15.1538015032532	16.5375404459067	15.848462322888	16.2660373170603	15.8956720524802	17.9492463072966	16.4625224069703	16.0220249344457	14.8449335128184	14.599479716757	17.0460464331176	16.0937747592043	16.7730755975164	15.2637750573048	17.0533302612716	16.6301113345642	16.0522678148603
3.40x40	7.40x39	16.7142046475446	16.9716096467012	17.2825358382386	16.3717019884922	17.8294705193396	18.6006507681855	16.8326353551665	17.4540242924089	17.6756928294197	14.8913765649788	17.3336092606243	16.6789720906296	17.8870115167403	17.1083692677005	18.1544110617778	16.6854475816503	18.7725657809475	18.6012022460915	18.2057780113897	18.4767526908816	17.1289566815962	17.4785215335852	17.210794664977	17.9374666550213	17.5294878989661	16.7226340927499	18.3931617184213	17.0127630031103	17.9631557361172	16.883372589622	16.2066076030735	17.9765493351755	16.8910994609587	17.7978253446875	17.3978093161179	18.6124058090296	17.848360064723	17.2557627765335	16.7270728461378	16.6676247557953	18.3282895546748	17.2552981428893	18.3108074371394	16.5782789516886	18.8040899806399	17.7850046387399	17.1123434105326
3.40x40	7.42x41	11.8937345690914	12.7853186898098	12.06199734704	11.4338831986338	12.7104791805817	13.2901149355451	11.9783427067354	11.8665792037975	12.5618168669982	9.95229124372875	12.0717327256695	11.7098619547798	12.6577847192943	12.1068123385142	12.9544096739296	11.8670050560367	13.4028022070013	13.2487369209295	13.1027338368754	12.9297660071635	12.1402353354455	12.3742679379428	11.9790338091183	12.5674015213965	20.2221377208247	11.5688667552185	13.2438939893069	11.9903051670923	12.6277541154395	12.1668305651061	11.5818142361204	13.0792266208672	11.9425938137408	12.6439537329112	12.2046926630702	13.48803265862	12.9480258340799	11.8492801891085	12.0290545347504	11.6253297157543	16.0760399663599	12.0799124996831	12.7279395425968	11.6542715345061	13.3853926726114	12.3541223484309	12.0812069347396
3.40x40	7.43x42	13.30422511836	12.6411947615722	13.2844202733879	13.0185354783094	14.0248089470053	15.1454075877805	13.401572519671	14.1824974175919	13.7837644350156	11.2214058833998	13.5713451433526	13.0652321066256	14.218426002902	12.4205271224695	14.4944413483238	12.8052303766859	14.8090250185487	14.4897964098879	15.4101399734071	14.7143668908995	13.5012581635935	13.2954786299704	13.1912254548241	14.2468251200048	21.1214166665023	14.1430316764122	14.3938587599017	13.4241705144117	14.9535303523951	13.3584468034274	12.5121985278367	13.9535425251081	12.8029264623366	14.5814929962607	13.3948993650568	14.1065765159375	13.991151382213	13.1024192422621	13.4889018455914	13.2938518496334	15.051116005134	13.7866799846809	14.5460016843117	12.8583624540608	15.6040146757173	14.3893569696495	13.5234816522965
4.57x57	4.60x61	6.58100623005327	5.33780563527748	6.21068184662522	6.54059232791649	8.90251363380029	6.05829926629578	6.85840280240232	6.77226239893287	6.20215204586279	8.4701444497718	6.15229981389074	6.08025279079743	7.69780916884798	5.53673631302774	6.36751654885953	6.26900398787559	5.4205776444951	8.97028043039904	8.44967129538185	8.32339323833735	5.46987650683267	5.54203473464395	5.84629532268085	5.1829278405164	5.68127353680493	7.52723495049809	5.82447285168366	6.07255942745726	8.66308628607611	5.85360008883422	5.65796023315824	5.93514296373727	5.53106942643102	5.38436263637582	5.58507260472055	5.8427680084015	7.9093454849311	5.75645594094144	9.34856571886832	11.4206558918479	5.80000086206889	5.79043219457754	5.93669141862705	6.09101740270047	5.52694137837557	5.29563471172248	5.93392736726698
4.57x57	5.38x39	11.1668821521497	11.0820419147376	9.69954277272903	12.6415689295277	10.2528948595019	9.99213815957326	11.375939785354	12.5385846888714	11.1551330337204	9.9984828349105	12.1668196337416	13.4177437000414	11.7935800756174	13.6850392765238	13.3856060378303	13.5227743455254	14.2985750338976	10.2327830036603	9.75908453698399	10.5066718326975	10.1493336727098	10.2586770102192	9.63839685839922	11.1636183202401	10.6209074000294	10.4414404178734	9.67448458575443	13.8150005790807	10.1187213619113	10.4998536180273	10.6399234019799	11.1112643294991	10.7307359020712	10.5594786803137	10.0152047407929	9.8464918118079	10.7708053552183	10.9301306945526	10.6059557796551	11.2580682623619	9.42284256474659	10.632029016138	10.0260715138084	14.1183167906093	10.693453604893	11.1964875742351	14.3568321366519
4.57x57	5.39x40	12.3285368556046	13.2391744833279	11.0456651225718	12.6540550812773	10.7849619841704	11.1398386433557	12.20115818273	13.8628717443393	13.3049721157167	10.4784611942785	14.0081992418726	12.6473322878779	12.468206687411	12.428903893747	15.0368415899084	12.7002862172472	14.6921549134223	10.0095305584228	10.0391044421303	10.2918532830584	12.5412977398673	11.635752919343	10.5525855599469	12.0816298155506	13.436342582712	11.0419428091256	10.6062356658713	13.1251705512728	10.7748433863328	12.0803691168772	11.4800344076139	12.9096648291116	12.8868857758576	12.7560190498447	12.7268018763553	10.6783446750889	11.6636427414423	13.0423914218214	11.4565274843645	11.4463708222301	9.48790577524883	12.0663838410685	11.0979535951454	13.6460676387009	9.54458574271299	12.205200735752	14.1000692551491
4.57x57	5.42x43	8.27939913278736	10.9704457521105	8.23205715480645	10.0399432767322	8.94391977826277	8.47495917394296	8.13624256029772	11.83133842809	10.6909940136547	7.9771880384005	12.0298705728699	10.6514153519614	10.4633993042414	10.3161470036056	11.4512953852392	10.3802398816212	10.7680754083541	7.91846809679751	8.34353216569578	8.57377355660855	9.82147264925174	8.80981713771631	8.02621766462884	9.40009968032254	8.5644078020608	9.08699609331929	8.72835035960404	10.8139766506129	8.4366729816913	8.63448672475672	9.59281241346874	10.0236746256051	8.64090145760267	9.81564103866885	10.0170688327474	8.6084444587858	9.40256800028588	10.572917336289	6.92319254390632	7.10354679016053	7.73537937014081	9.67111079452614	9.25710802572812	11.2539254484824	7.59470170579464	9.5561226969938	11.6407299599295
4.57x57	5.43x44	10.5142077685387	14.649859965201	11.6486500934658	12.8416345532802	12.2378205984562	12.0356763831535	10.5359314253653	15.3716282156446	14.4419040988368	11.06787192734	15.7111757675866	13.011494764246	13.4849437892785	13.537346157944	14.6577496908632	12.4914315032345	13.3350376827364	11.226042446027	11.543897911884	11.9614823914095	13.518503356511	12.1991016472526	11.3228612108424	12.7828670884117	12.0976475812449	12.3993879284423	12.3350574380503	13.4228161724729	11.7474175459971	11.942522514109	11.8762561861893	13.6180607650282	12.220817730414	13.4722957954463	13.777138527285	11.8242007340877	12.6377313628673	14.29644952427	9.9214809378439	9.76903639055562	10.6324044787621	13.2824657725891	12.8303646869448	13.7425130161845	10.0496097934198	12.931543063378	14.2978952646884
4.57x57	5.47x47	11.4230625490715	16.4882016302567	13.1416789262255	13.8422313952628	12.0477663904975	13.411880926999	11.2237096808497	16.1675668855892	15.7089619644329	13.5780806080977	16.40288864804	14.327777147904	12.9802718384478	15.8733062088526	15.0409909912878	13.7107399143883	12.7705239516631	11.2464135172063	12.2193436812294	12.2711851505875	16.1123314576134	13.975144507303	13.1129518415954	14.4684847167905	13.4491708294601	12.2514185709248	13.9042674744123	14.1460800930859	11.5856140536443	12.9221583723463	12.823706718418	14.6282721467711	12.4169185388324	14.900796388113	16.1346479664107	14.5469088468994	13.0660115184397	15.1418550382706	10.8802777997623	11.0788924536706	12.1638222200096	14.034019345861	13.9546963062619	14.414984495309	11.9361388648088	14.3792702526936	14.6728088994575
4.57x57	6.51x51	17.107405267895	21.1012517164267	17.4355997889376	18.9200195560153	16.7600025656323	16.6140447814492	17.1663279998956	18.4521531805911	18.9553262435654	16.9982918259453	19.2876383468791	18.4793269899096	17.3103413600079	18.5085016411378	18.3382956132788	18.4079108537607	16.1068623263502	15.6882780763218	17.7658732124261	16.4274378099568	17.7155165039013	17.503844749083	17.1044336357566	17.2753417621765	16.3281799965581	15.3222381198048	17.382000517777	18.7376859296979	17.8849358679309	18.4454594141756	18.9064901290536	16.1166301068182	18.9491026172745	17.2228698537729	17.0959968998593	17.640944787624	16.154706218313	17.6882668738348	16.4725033009558	16.6465114663704	16.902940483833	17.1109446261742	17.7365661840166	18.37354824197	15.7497294579939	17.0354982316338	19.8148155176878
4.57x57	6.52x52	15.3154824279224	20.8238628981272	15.8145900990193	17.5654776194671	15.7611912620842	15.2277385057664	15.414430252202	17.3359881172087	17.3609969759804	15.4845781666793	17.785259008516	17.427387210939	15.7838370810142	17.8069360362753	16.9248510185467	17.1933579617246	14.0608023597517	14.4709008358153	15.8308610947099	15.3500385015804	16.3296681227758	16.3378864300129	15.5471641787176	15.9057312312261	15.1943215050887	14.5012691858334	15.919121866485	17.7336084032551	16.3904141802457	16.831853165947	17.709695706025	15.7785780411291	17.7064927639553	16.0999160867378	15.5859383740601	16.4554345430317	15.0083425134157	16.9275100059046	14.41855544082	14.4776739153774	15.1304525047997	16.2153663541716	16.2298677135706	17.6777954225067	12.9157576239259	15.6211040903004	18.9019271504257
4.57x57	6.55x55	15.9283779462945	20.4387327640439	16.5684974877024	18.1241944372709	15.8446022985747	15.5928456030322	16.1935248787903	18.0447488483492	18.3987275646986	15.2376757742118	18.3913624835138	17.6868105943384	16.4021145588	17.5850485071836	16.9366700977494	17.6262857403368	13.9109329665555	16.209783280476	16.5023247756187	16.1812095345187	17.043838212093	17.493064968724	15.8126930343949	15.9157202161888	15.0968195657231	14.678932658746	15.7511974465435	18.20535737084	16.3616626905703	17.8312453294771	18.6671845761486	16.0986966553196	19.0429452028829	16.0398704795269	16.7056460515599	16.9870301406691	15.7785413140759	17.7205090784661	15.3083016366937	15.7729581879874	16.1137529768828	16.3192620543945	16.1520160970697	18.2563729146838	14.6485992163073	15.7553519478303	19.4796630617678
4.57x57	6.58x58	20.2198875862355	23.1638112796664	20.48489760775	21.5145904213861	18.9265601206347	19.0676432995795	20.2889707230308	22.4937988343454	22.544909092742	19.0026461578381	22.383806401057	21.353895312097	20.2299663123793	20.3564946147415	19.769018994376	21.0962712582105	16.7307581717028	20.0905869501117	19.9323088978673	20.3994725667111	20.6013672361812	21.2247603048892	19.1522101596656	19.5288745195416	19.0533493643506	18.5477585438241	18.4975849504739	21.5748817841489	19.2110851593553	21.5535794011111	22.3769713098087	20.125781525198	22.769378669608	19.0684250529507	20.6883865731477	22.0024468184791	19.662294983038	21.9682175198626	18.9113743815726	19.5545078946007	20.1039291184584	19.618816197722	19.3625066042597	21.9328964343518	18.1707881226985	19.423281365413	23.2652139255155
4.57x57	6.59x59	19.3349020168192	22.5718732939914	29.0671730307576	20.2385958752083	18.1965364011946	18.9064387180664	16.1065426768131	20.7747347756837	20.7197131495588	18.4801572504132	20.714830967208	20.6858691381339	20.3028475342746	19.4467709401844	17.9944810983812	21.2158560986824	14.5307236915441	19.0155436945673	18.5584042417445	19.2338538260017	18.8968387832463	19.8462001652709	16.7692751781346	16.9626352315906	17.9241993126611	17.344159074455	15.9877672612532	21.3877989751166	18.7945671139295	19.711510190749	21.5901996285352	18.666378866829	22.5253044818489	18.2333274527717	18.9315041927471	21.6690058839809	18.017446156434	20.9230617501359	16.6015064677878	18.0959436891255	17.969536304535	18.2248065284655	17.5979882088834	21.4252149114075	17.778582339433	17.0646252229576	22.2669051733733
4.57x57	7.32x31	22.8390017513901	24.0779757870133	24.3774895138938	24.4022232593672	21.9101374938634	24.2351238082251	23.0708041689058	25.5193441334216	26.9946744007036	22.4069752309409	26.7315547434114	23.4267145370408	23.8025328694238	22.896982115554	26.0794471375449	23.7645882354397	22.4354982561119	23.7393867022718	23.6336369397518	25.7745626733025	23.406114286656	24.1745577622425	24.1031299212364	24.9816154401592	21.0640521505241	28.5337621949858	23.8394185751247	24.3143300339532	22.6929038688309	23.2478454485572	22.5465314627328	21.5730699252563	25.8209023273781	23.8707697613629	22.3682864117929	25.8685691332165	23.7677381549023	23.4998260631861	23.5295933241525	24.0499946985441	24.1452258220958	26.0900544652555	25.9133196059478	23.102845842017	22.8537186033258	24.8109476441348	26.2575291107141
4.57x57	7.35x34	20.2501739745613	21.8707476552586	21.4335328165937	22.0172280044514	21.282533307856	21.0132107256364	20.4744637536615	22.0395984990653	23.6212914761238	19.3544346856218	23.4683360509432	20.4887736089791	20.6074046400802	19.926859336082	22.903404746893	20.8491916629878	19.4043666477419	20.0086150445252	20.9871656495107	21.651261579871	20.5166345437062	21.3231036437007	20.6784444772812	21.2724220294728	19.3925243586285	19.5582966027208	20.8429237392454	21.1972467315923	20.7202928068114	20.4394916032665	20.7694485723622	18.6212994713044	22.6225081500704	19.9589183574662	19.134591843047	22.4580464644635	19.4471717738081	20.0342731587647	20.3457211472093	20.8639281296692	20.4277130633852	21.8944938055211	22.2038451399752	20.1606528168113	19.4738772718737	21.0955569966759	22.465303514531
4.57x57	7.36x35	19.7688627138741	21.3619221981544	21.8480419717649	21.8828674080889	20.6975961889298	22.9953550309622	20.2738693149581	22.4439216493018	23.0769896000323	19.852863370305	22.978079989416	20.9373432412042	21.2234837385383	19.8042867329273	22.6980670983236	21.0328577706407	20.7512138199191	20.4527384230083	21.1125152220194	22.2619282632929	20.8529730734013	21.48430541116	21.3395014234166	22.4218263529089	20.0733127061778	20.813970452559	22.1596610533645	21.5949698078048	20.6913364237306	21.5175982163438	21.2690601578913	18.8028077158705	22.4020383670772	20.5147682414401	19.9324674588973	23.2543432717417	20.1198401832619	21.2155110709122	20.4267268303074	20.4975157519149	21.9185856067402	22.5225439504511	22.8080552656293	20.5832050711253	21.2617071280742	22.3050488006639	22.6263628097845
4.57x57	7.39x38	16.8736138097326	19.123438655221	17.9247293424475	17.9336863750875	16.7020182612761	18.4896600834088	17.1684035949764	18.9675394556068	19.2143959311762	16.5748277215783	19.2258320236082	17.6999570055975	17.4956054482261	16.8465112708834	18.8932473915947	17.3851634734908	17.114186191578	16.6247286594398	18.1769308190354	17.8948324943264	17.3825102329899	17.6651073305542	17.7703486178522	18.5540994931039	16.3544210842206	16.9153994040933	18.5312402445168	17.9587197205146	18.2782686816886	17.9651795148281	17.8399268215988	15.6908755013861	18.5805725961285	16.9574894663096	16.7814556281629	19.0730944002278	16.0728629061533	17.6882182822352	16.6994722371697	16.7970608738553	18.2060761835163	18.0271973417944	19.0576142263401	17.1139250319732	17.4743680572432	18.2183188302324	18.5510422887772
4.57x57	7.40x39	19.1737826471461	20.7279370415871	20.5998049990771	20.3665050757365	19.1842754880136	21.552374718346	19.5862748627706	21.571952670076	21.3998293684786	19.1436280260561	21.2113713135195	20.0664966797894	20.0409197892711	19.0440273576783	20.8944344982103	19.5929952023676	19.8813887844889	19.2520672396499	20.2703991327255	20.3477010740771	19.5775962773779	20.1533976043743	20.4115573389195	21.4637030355901	18.6834693245125	20.021004320463	21.3165177503269	20.419846351038	20.6917336393063	20.5442666698035	19.8677436313236	18.4117825861593	20.5469222269419	19.1653534274743	19.2385314928141	21.5185119141636	17.9808810963201	20.7251386967615	19.3852743596783	19.4760856693536	20.8069611668787	20.4064430021501	22.0864867283142	19.5461128104797	20.4879025280774	21.0886355651569	20.4794014805121
4.57x57	7.42x41	16.8803497001691	20.4602352381394	17.6420890202946	18.1145396298112	16.4121227755583	17.234607799425	17.1823358714699	17.857008764068	18.500854547831	17.2107150635876	18.3529643927078	17.9243625828089	17.2314982227315	16.7287517167301	18.4194937498293	17.5416720696745	16.793597857517	15.7953336780202	16.7900000595593	16.1590499101896	17.2695742564778	17.5950737139689	17.461486677829	17.9620461250939	18.1361019516323	16.8235385992365	18.0841317458152	17.772379750613	17.3614034858936	18.2806774765051	18.0961531823755	16.0601801048432	18.1258772753211	16.770018634456	16.7248906124973	17.8746417586479	16.1550402351712	17.2882266875466	16.6729194504142	16.780278573373	20.9088067091357	17.3862011376839	18.116390203349	17.3883192402256	16.9554488292112	17.413761713082	18.2534822157308
4.57x57	7.43x42	16.7587027540917	19.0781234140049	17.8489638074595	18.4893193222466	16.4893596297734	18.9945214733091	17.2875453433968	18.5815750408839	18.1589704003283	17.4203640030856	18.0754474910028	18.5125699188416	17.3892114542322	15.9452556266747	18.101182060849	18.0543883585127	16.4664910044612	16.3121569389214	18.4437283649483	16.7627577086827	16.8773318092642	16.9428362442656	17.6574739699652	19.112151579558	18.4729664645395	18.1460691611159	18.7065998246608	18.2856207988682	19.4168939586124	18.5894100498106	17.3793080702311	16.2034157818653	17.6811754699737	16.9489717977227	16.1875623242043	17.630799187785	15.6935092633866	18.0147580888559	17.1592698271226	17.1944135404497	18.1449510883882	17.651842764992	18.7464107497942	17.6196497127497	18.0236687164406	18.990228276669	18.5867713172568
4.60x61	5.38x39	10.0488979495266	9.84827528047424	8.59162458444269	12.6276948411022	11.5189002079192	8.32582266205569	9.86560008311709	14.7233028903164	13.1580491335152	11.4564921332841	14.4666635061441	13.4530029361478	11.1320472959829	14.1362813002572	14.7589912256902	13.2630209605504	14.0135393816123	11.5669018756104	11.7761875834244	11.9118271478392	7.73704859749504	9.43398288105295	8.50735922598782	9.34612106705236	9.02890884880338	12.0869355090527	10.0275456618257	13.391569922903	12.0402200146011	7.80491780866397	8.92805521936329	8.04805324286563	8.22173789414379	8.57162580844498	8.1319661829105	9.27677664924622	12.3135557009338	9.49336894890323	10.1150947103821	11.3162063431169	8.83223607021461	8.44961880796998	8.39865018916731	13.806569812955	9.65978804115287	9.29542688637805	14.3681852368349
4.60x61	5.39x40	11.9334802132488	12.0827929718257	10.7520760320972	12.8296465266975	13.5258319522313	9.63785416988657	11.7090628147602	16.4732726863851	15.6181758537929	12.7729353713232	16.4588092825696	12.8449207860539	13.1543328983267	12.3317922866062	16.6424395447302	12.5385977286138	13.8029470041727	13.2936917746727	13.6583560138107	13.541443756114	10.5669987224377	10.7989605518309	10.1213547018173	10.2855040712646	13.136982111581	13.4010589506949	10.5207324364799	12.9273732830765	14.1044955244773	10.364999276411	10.5607223237807	10.2501515110753	11.5356648703055	11.0143248998747	11.0616046756336	9.96607831596762	14.2903545792258	11.9963722433076	12.5565627064097	13.9906629578444	8.70673199311889	10.6285038457913	9.95018567665951	13.5901118832775	8.50044387076346	10.1813713221746	14.3326448012919
4.60x61	5.42x43	10.5852388258367	11.7807983176014	10.9149406778049	13.0069652494346	14.6484713878275	10.0128446008115	10.3635039441301	16.3559765529301	14.959184035234	13.5733302472164	16.1922405182235	13.2980601968859	13.6087420065192	12.7779632179781	14.9904316482215	12.6910385311841	11.3423613943482	13.8252828542493	14.5089675028928	14.1258410723043	10.2218766378782	10.5213194514757	10.56555294341	9.68547711782956	9.73674370618843	14.1949469178296	11.3148235514302	12.9579259528676	14.5728356540517	9.54506306946162	10.8673232214746	10.0203144162247	9.68075301823159	10.5654006076438	10.7325519798415	10.8914392988255	14.5869781311963	11.8117012322527	11.780781213485	13.3572401340996	10.7057338842323	10.9031592210698	10.8372552798206	13.3915234010175	9.61572852154219	9.79840119611358	13.9836558167026
4.60x61	5.43x44	13.365364267389	15.5663603324605	14.2438751749656	15.729401959388	17.9335156062608	13.3098876028312	13.4193033351214	19.958060426805	18.5760643302073	16.8381577970988	19.805155616657	15.6583915521359	16.9750081296004	15.7909686846628	18.2679060923796	14.9543876504523	13.9091881143365	17.427971023616	17.7911231236254	17.6892085181898	13.880596384882	13.9306227427204	13.6394292035994	13.0645349706754	13.3626781746774	17.3924793804679	14.3935725238733	15.7192358592904	18.0677468158041	13.0763639441551	13.5630236673096	13.6031470255967	13.4282441517869	14.0899742015378	14.4764533639977	13.6678027861101	18.0408681054987	15.5023927830513	15.4135025545786	17.0176100848503	12.6497356889383	14.5487083275458	14.2399416782514	16.0883008736162	11.9088453680447	13.1186056042554	16.7970619752384
4.60x61	5.46x461	13.327593406163	15.1100954662768	14.1115086011383	15.4707113605031	18.8261295278663	13.533245360962	13.1406518103175	18.3627437220041	17.3816993703147	17.7846267602106	18.0278274065401	15.5966142479706	17.6764941094098	15.9903234801551	16.5577967737257	14.8758274727828	11.3899081646868	16.7963689230738	18.9624961437043	17.2869779892265	14.5122361474722	13.8144169981943	14.0273132495143	12.9783926970947	12.9218530017951	18.2599417852303	14.6977857856209	15.156607173111	18.3754223352825	12.9314386670625	13.2829289691694	13.2225247589105	12.2028717111998	14.1123200785697	14.7399852781473	14.9439130083121	17.0934654766083	14.6272112858193	15.3315338436831	17.6723680642974	13.701581988953	14.1771583189298	14.367651478234	15.4862586185302	12.8660354810641	13.1339898355374	15.5989532020581
4.60x61	5.47x47	16.2755529859971	18.6149640880664	17.4461045508732	18.4174805551682	19.6578519172365	16.4110603557479	16.2691661126193	21.8394115534279	20.723537342838	20.927260833659	21.3762837977044	18.2689376264741	18.4995931036334	19.2383954892293	19.9361119830322	17.6018964319189	14.3794545793643	19.1327858400182	19.8932469194951	19.4986255413042	17.7093335278322	17.0638975911132	17.0715722474528	16.1502357567931	16.2982284006575	18.8587678017415	17.0785773997719	17.924744740163	19.4976508585009	15.92851797877	16.2471925574851	16.4411578059454	15.5342278533566	17.0081965534268	17.9621279641361	17.7396508139253	19.9944987183975	17.7768840070469	18.7127730173804	20.924021625873	15.7701723833318	17.0633113433472	17.1724128764714	18.2041871282406	15.2058969482237	16.0130536125999	18.5838054499072
4.60x61	6.48x48	20.2543419048855	21.260982902961	20.4729850290572	21.5785324338797	23.2471335652377	18.1857974529576	20.725418885996	22.8721693111956	22.1148500560144	24.6232285860323	22.5527282828486	20.73786703111	22.4399356059682	19.431108614796	21.4419214857251	20.4749832722764	17.5203096433824	22.2730221119632	23.6652993642591	22.6409382535265	18.2195724153999	19.1151134184446	20.1929125685226	18.2631387773296	17.7092952428943	22.2799261219601	18.4864212058473	20.8516383289179	24.8184656052706	19.9683536376938	21.1534902557474	17.1887424787272	20.4328904220622	17.4993111864439	17.4326976110985	19.4359481888587	22.0821082779702	19.2279788069365	22.5993541721882	25.3595923863141	18.385754947785	19.640869074458	19.8494163894055	20.7234862173332	16.7399074668888	17.8499021005719	21.8471409800001
4.60x61	6.51x51	19.0601428116371	20.4867667776055	19.0757198815667	20.6128008771249	21.7911289519382	16.4114438731027	19.273360838214	21.7881864550494	21.4373267689794	22.5098208344713	21.9152519036401	19.4037945773501	21.1520276569411	18.6375023004693	20.3130389897721	19.1293702196387	15.5562197207419	21.0781099247537	23.0113754043516	21.2121426074784	16.840944807225	17.6814375546786	18.4786005151905	16.183213154377	15.9876823523611	19.5770570055869	16.9587080286206	19.5739853376874	23.5168325035495	18.6657686956632	20.0016451573364	15.3065610115401	19.8554181270504	16.4403864613944	16.1351093581667	17.84493096092	20.9749831227584	17.3147702843555	21.1126759554539	23.7384800060998	17.2805153568984	17.8951105333273	18.1501210188803	19.2948638243446	15.1908485938081	15.8308919205457	21.1714361345658
4.60x61	6.52x52	17.706415927567	20.6424402384989	17.7378745344531	19.8022624969977	21.230275999148	15.0967175902578	17.8924090328832	21.2589555246724	20.568802152775	21.1176825906632	21.0987803675947	19.0804825148632	19.6374969127942	18.3845088593631	19.6327954453766	18.6265926298934	14.0743847112405	20.0487650492493	21.4482990001538	20.3657401780539	15.752371123104	16.9890303431361	17.2792416789627	15.3114447718039	15.4176661333679	19.3108034529897	16.1792363540434	19.1821860328796	22.4708527875557	17.2676697038135	19.0399681197212	15.0831258365102	18.6292641024813	15.4663499572459	15.1379291516376	16.8500797030756	20.2438099427949	16.8570385892659	19.6696188575173	21.6658380174873	15.9640358618991	17.1379457637139	17.1235997675722	19.2283992573485	12.6082437317812	14.8931551391906	20.8864148670853
4.60x61	6.55x55	16.4573196784896	19.0720954276136	16.5050169948413	18.8360440645057	19.1769840433787	13.3892837747207	16.6701046487417	20.3566554472978	20.1426301658944	19.0719925545287	20.2770436947796	18.1130956216766	18.1760093529906	16.6141577577679	17.9782350913542	17.7634276534682	12.2075995183328	19.5784097668835	20.3481909269596	19.1956610982795	14.8788963972467	16.5027162915685	15.7824465783984	13.6759228939037	13.8760252954511	17.703141359657	14.0918586779743	18.2996427560759	20.6519835851184	16.6004446325995	18.507919223943	13.5239185889298	18.4880329132117	13.828685620839	14.4025158218972	15.5853247961023	19.1885666478765	15.9174418484881	18.051985984927	20.2772835705377	15.2519937385248	15.6024242667606	15.3226679465425	18.5208903943628	12.3148590734933	13.24980452686	20.1978370376632
4.60x61	6.58x58	19.4206083581334	20.9189435201685	19.1684489982888	20.7595259338936	20.2381084837492	15.5829194633098	19.2690552440954	23.8439927445049	23.4330499081959	20.8190198136224	23.345089290898	20.6530140415388	20.3553791170786	18.2797652063696	19.6509961834	20.0854895384703	13.7736502424013	21.7629169690095	22.3323218004756	21.8349711701206	17.3309534936771	19.4312071421206	17.8941978026398	16.2991130126765	16.7461862225403	19.8799968058347	15.7472368687335	20.5971767482828	21.8703164357537	19.2607619008179	21.2461935178987	16.272757172649	21.1376873853314	15.6575054526575	17.5479155172345	19.6037306653606	21.502012603475	19.2504270601979	19.678059203082	21.4608818551335	17.9884305596681	17.4250898993377	17.2039296383123	21.1085960452134	14.8899745466539	15.9409051185935	23.1791784366918
4.60x61	6.59x59	18.483239191224	20.8094733474925	27.8414509858951	19.6930617985117	19.3490843194194	15.2036083545979	19.953830760032	22.0324567173069	21.6508507685033	19.0850855643877	21.5811720951389	20.3851838353251	19.6364258967868	17.5915345834296	18.0918983249409	20.5637146692907	11.99414728107	20.3346894001359	20.5221521532221	20.3217934740022	15.5663728915891	18.1879916978208	15.402004057914	13.6488086293273	16.0013735035465	18.4740772976623	13.6151899729677	20.6359471553888	21.2670292471704	17.2213010542177	20.1681480062003	14.610584998555	20.7952876633145	14.9200889072418	15.750966795724	19.682511475927	19.7821433115828	18.4401540666015	17.2512289996974	19.0962816014008	15.753878157457	15.925637506863	15.7727792097652	21.0272608059157	14.2402264378064	13.5058922326516	22.3383323907583
4.60x61	7.32x31	21.301664019508	20.987079287028	22.9780213682554	22.7029192836516	23.1852570828964	21.1607454027499	21.4426637804168	25.7183739960364	26.6849664418001	24.1783371636678	26.6707872024805	21.0488751718471	24.5256575243152	20.0926478842387	25.0327776325361	21.1297576181082	19.1210298362824	25.5202264488386	25.6446269226129	27.7459828804099	19.9358538568078	21.6726658720149	22.3201019934946	21.7370028522793	17.6541351529889	30.042325159681	20.4211263646254	21.9921733578107	24.4028324995276	20.7442763190235	21.0321684331407	17.6704557383221	24.3546595952397	20.2220677478837	18.6200783295882	23.3862077515787	24.2464280874524	20.4609912272109	23.8530703474416	26.5879625018541	21.5799104261348	24.629993808363	23.8094251505575	20.7771814498502	19.6226008724634	21.4932218152607	24.9148099129815
4.60x61	7.35x34	20.179415378053	19.8100517414771	21.1583962530245	21.5419284419942	23.6190625766562	18.8956920222574	20.3181467904925	23.3852262336715	24.2559508780835	22.8111499271738	24.4028681511006	19.2527222490743	22.5355914943451	18.1612382287112	22.9889490407891	19.4074509918227	16.9459527616478	23.248060972907	24.4493919965303	24.6967033225084	17.9763984157005	19.7594767137189	19.9428684747205	18.8121662229526	17.1284668899467	21.4663678809434	18.5002818897443	20.0220906251071	24.0825625297641	19.1847682550507	20.5061733631607	15.9174676377871	21.9954553033121	17.3908503242366	16.3865836891037	20.8434434055412	21.8210567571784	18.0312056169298	22.5889989596706	25.3322221686136	18.916474803726	21.1970171014697	21.0239376426016	19.027806205656	17.1098720334198	18.5309181100128	22.0782319038459
4.60x61	7.36x35	19.5702042401197	19.0033449950265	21.7142789196418	21.2820109482163	23.1935430023099	21.3109215427208	20.1944750365044	23.5901563581084	23.3123738173529	23.4358370663392	23.4774470716047	19.5432730626167	23.5405078959652	17.970923348565	22.386553933109	19.4106086715487	18.2802905064444	23.8761007285528	24.0348489905803	25.444235437521	18.3893812022047	19.7437987732858	20.6415409792971	20.1715803545483	17.5520205674447	22.5786550086581	20.0290905934343	20.3597782650008	23.4591688471693	20.1890843031575	20.8320530433272	16.7640532091735	21.9454530598026	17.9555084862557	17.0920012578984	21.9834733606862	22.279862364925	19.3802419747536	22.455076397109	25.2750166172052	20.220512580051	22.1585744351933	21.9079568193841	19.3234333905753	19.1219619547786	20.0710563000556	21.967466535766
4.60x61	7.39x38	18.2858684234575	18.1080683950553	19.0534857965675	18.8223599742434	20.9033113883901	17.9260813899748	18.6870816073565	21.1686325255081	20.4123399197642	21.8258818149462	20.6793842751664	17.6237568639606	21.2237332719764	16.3867496777122	19.8376008125983	17.1094539363476	15.792964034658	21.4917481838961	22.5496239214759	22.1408486964705	16.0754712839158	17.159007663615	18.3479045942582	17.3039123032914	15.1153580837504	19.9390201113294	17.5323290238348	17.9547366452421	22.9618803672522	18.1448601262176	18.8643351592363	15.0739205915382	19.2114672266332	15.6660038937822	15.325273146016	18.7958880077532	19.6721583462517	17.0960398045863	20.8820666122872	23.9994105969292	17.7038897985725	18.7251853128347	19.2669668863576	17.2491858068722	16.4913157146421	16.9337715232018	18.9965656369776
4.60x61	7.40x39	20.7493467367047	19.6165579294636	21.9846239221871	21.4351316534329	23.6988445920893	21.4308354013557	21.3800649671604	23.8649610098152	22.4782215711119	24.6435469240935	22.5235746274875	20.1151281626541	24.2626545126456	18.8415335097757	21.7848992194134	19.4376703851053	18.8013294742686	24.4800048611106	24.8340519851272	24.9560460009193	18.5687050975559	19.7946598354203	21.2515819175891	20.6400337451275	17.5710403505313	23.1097190809408	20.674146004128	20.6688767232281	25.4684811679063	21.0888985724717	21.2724460981806	18.3185655551956	21.5671815961196	18.2496986550463	18.0569260396115	21.7515017642461	21.433680155307	20.5609274839439	23.5449531110172	26.6588584526795	20.6683774641359	21.5896165088683	22.6633120483304	19.8215463322113	19.8273924407624	20.3075392157691	20.9522031538452
4.60x61	7.42x41	19.9223919497635	20.6019273612932	20.3321515339622	20.6861689541587	22.606305602641	18.2322397417322	20.4492652924255	21.499511947949	20.9281789222092	23.9979654554298	21.04283348316	19.552887919691	22.6824541220742	17.9044574059087	20.8606515957676	19.0391896886396	17.0582549224708	22.560360480276	22.6994460064558	22.079284612505	17.5690814216339	18.6012849556153	19.6159222571869	18.2004534009458	15.4037391889112	21.3698278186793	18.6823555527669	19.4793427507193	23.572205560787	19.9973669016698	20.5636397070168	17.0614410587148	20.2425714275633	17.1753293418205	16.9558311503742	19.1310910823194	21.4282286015433	18.3688555168797	22.5824463245238	25.7378363115472	21.6699010150023	19.6368656103768	19.856203388362	19.2206633860541	17.6051969031874	17.7436993324391	20.2228565984136
4.60x61	7.43x42	19.4872782347869	19.4073271214766	20.4802954080257	20.7132738358764	22.2723525025984	20.0796790312993	20.3176742025262	21.5438380285408	19.9875762912865	24.0261219717207	20.1372275400562	19.7908116811817	22.7399943051884	17.138893488204	19.9875265853482	19.3852184924493	16.5388208769549	22.6850942030224	23.835163792179	22.1660556031063	17.1011147589857	17.7642787920028	19.6655469794257	19.514423870563	15.6740239568529	22.0351672106204	19.2302762590661	19.6726789736426	25.0830045050428	20.362462130106	19.8617270397113	17.6555233567289	19.8452156702818	17.284671532893	16.3155840226453	18.9410710890382	20.4376570330359	19.1649051132532	22.5519004077262	25.7735468261549	19.0026393956208	19.9170464677873	20.3753423774915	19.2027599318431	18.5388575969503	19.4710431410338	20.1759794309967
5.38x39	5.39x40	3.80798792014891	3.78318384433006	3.83526922131941	3.85930291633088	3.84639701538986	3.81542317443295	3.82359111307682	3.79013891565995	3.81095132480067	3.87221719432162	3.82200811092808	3.80988530011075	3.85800635043542	3.82566804623715	3.81217496975152	3.80163149187293	3.79762557396066	3.81625811496025	3.78950827944735	3.82751629650352	3.77917173465298	3.83791375619621	3.80667466432318	3.78210060680569	5.24943958913711	3.80841843814463	3.82784051391904	3.80735879580583	3.86680539981003	3.80491497933922	3.81369453417549	3.79594797119244	3.81071778015638	3.80556277047167	3.83287307381812	3.80566866660775	3.83094322589098	3.78534978568692	3.85267932742916	3.81457992444777	3.88436584270843	3.85982564373056	3.8327444475206	3.81392225930209	3.81086355043053	3.85630250369444	3.8071390833538
5.38x39	5.42x43	5.40048562631177	6.29495361380844	5.99971640996472	6.2470199295344	6.1905511870915	6.1427379888776	5.63039297029968	6.12558642090698	6.18495157620494	5.84738933200108	6.11039491358783	6.3678442977196	5.91816610108233	7.36029571416801	5.80046248156128	5.99287393493305	5.99518540163688	6.05132291321493	6.2326609084724	6.19855031438804	6.40575452230258	5.98129735090975	6.13829178192109	6.06984513805748	6.09618807124583	6.2271338511389	6.29066800904324	6.28787070477757	6.1871758500951	5.83250246463729	5.32215802095353	6.03669727582889	6.04986718862489	5.99344617061002	5.89931911325367	6.03851612567194	6.02897147115493	6.10545854133824	5.94922423514192	6.14249737484681	7.09025754116168	6.21419029319186	6.14231446606245	6.13384324873077	6.60376816673632	6.00711320019858	6.25847816965115
5.38x39	5.43x44	7.81016197015145	8.8075146324034	8.38752770487228	8.44449649179867	8.50624182585941	8.54269061830054	8.05602166084476	8.66486329955644	8.29730540597368	8.4345803689336	8.61453794466076	8.73735188715666	8.51868687063916	9.48023021872359	8.16841532979317	8.45295658334999	8.58308977000707	8.3115180923824	8.59707368818018	8.3412506256556	8.67805698298876	8.82696714619467	8.39248103959729	8.65301733501095	8.47879820493447	8.61219861591684	8.68625546481336	8.66815026404134	8.66140825732167	8.34265509295452	7.96252554156029	8.47400472031967	8.21990370989831	8.41232631321444	8.55305395750547	8.50822437409827	8.62846463746593	8.55579078753098	8.40600226028996	8.50040334337142	8.9841194894102	8.84336644044563	8.74019988329786	8.6218499754983	9.27510318001908	8.67747762889655	8.6867489891213
5.38x39	5.46x461	11.0489212143087	11.3503569547394	11.033675996693	11.7693739425681	10.4169902083087	11.5030773708604	11.3385326652085	11.1548366639768	11.1460261977083	11.5707360612884	10.9899642401602	12.1716427814819	10.2659303036793	12.6697718211497	11.2016617517224	11.903240987227	11.2327105366425	10.4511956253818	10.669503924738	10.7140258539916	11.7524488086526	11.4057862508465	11.3901735719874	12.0250133471859	11.2095256813123	10.5272745760714	11.3947150468978	11.9704187896665	10.4767629542717	11.3520753168749	10.6651135952694	11.0805681262289	10.8751365048904	11.5710008642295	11.3790358994073	12.0334564028794	10.6644207531399	11.0197499971642	11.5696310658551	12.1224084653174	11.7476299311819	11.1678141997438	11.0331941884479	11.6811366741426	12.2067437918554	11.7612942315036	11.6624193887889
5.38x39	5.47x47	12.9015326608896	13.58317466574	13.246350931483	13.582781048077	12.1593081217642	13.3612270768818	13.2170001513203	13.1973331018051	12.9793476338374	13.6019543448727	12.9696127929865	13.8955950574274	12.2711840504492	14.45253354952	13.2118273149478	13.5995577501623	13.671224743965	12.1497695862926	12.4140685917229	12.2079370083565	13.654016954728	13.6364312780141	13.3943051331527	13.8272568501493	13.4431800553292	12.3431563629406	13.2080730615787	13.6368487928847	12.3598535185495	13.0348515526645	12.6884333942374	13.1510920078904	12.6094054181789	13.3041015104366	13.285815029572	13.7610363708552	12.7497547035227	12.8754172359578	13.4689694854506	13.9215709961197	13.9010861805832	13.1463773717325	13.1886265016491	13.5360453235057	14.0858553520899	13.5247578536549	13.494635452653
5.38x39	6.48x48	18.0474676894017	18.5682648623936	17.7952150029158	19.0147325250712	17.1480585781598	17.0329536487363	18.506801155251	17.6394537613839	17.4092346758839	19.0579454821342	17.5129311652847	18.4397174869899	17.5567213624868	19.3727728784498	17.9457234181295	18.4923470927841	23.7928796912017	16.2972890076847	17.8627743086006	16.6298638298694	16.3602782983664	17.8360688493849	18.0467916539201	18.2292955705919	17.0216162863578	18.7892615607958	18.2609514812345	18.2921381473025	19.0446088171955	17.5800620306073	18.7619253276416	16.0803207990388	16.6920238736949	15.639558081992	15.5626660954992	17.8894360168229	18.61634754725	15.9604261534584	18.2175276588235	18.5452109721081	20.5665873931481	17.3066098933327	17.7395604793354	18.4486626344567	19.873764338947	17.8059116026111	18.4605534586588
5.38x39	6.51x51	15.5751120060178	16.8182573710834	15.6288647700337	16.7843675186168	14.9155301950685	15.1123303629851	15.8608176649251	15.2023581394467	15.2061723651943	17.0018711323195	15.4454625375869	15.3914268344426	15.2942559479041	18.5868235317388	15.4748511786059	15.3777213526582	21.6492580473327	14.0030594157134	16.2017254636659	14.2102510181911	14.0167699916921	15.7256993167236	15.5483612641333	15.7701962892033	14.3433046401448	15.3035460269834	16.9334147176522	15.2200285479364	17.1313760393029	15.0789492007898	16.7359623266784	13.6227515942999	14.5428875055816	13.7985204279299	13.2817592208261	16.4534394580586	17.201812142911	13.4524754599293	15.7347611675551	15.9998367804175	19.2674242440447	14.6642998810035	15.3180833657478	15.2348200514479	18.2453243873602	15.4924286669328	15.6581082829312
5.38x39	6.52x52	12.9228592424432	15.3626468097135	13.0116039749141	14.1556435742074	12.8365000292136	12.1291648929347	13.2289911179954	12.6202160837285	12.6998438179373	14.0538246040001	12.7683772657296	13.1287711915472	12.4832805784377	15.7067588954564	12.7586436191313	12.9485762151674	18.3471960528033	11.4519955902891	13.3418736315407	11.7082246732799	11.5877042161077	13.2677401617608	13.057821257775	13.2655874351647	12.0636395005819	12.9530015826449	14.1498165712493	12.9064542768337	14.623993606399	12.7028832553873	14.5089467570875	11.6153466586237	12.627837542509	11.1115411172348	10.8080383511533	13.6606536812848	14.5291744087543	11.1402534082488	13.2661914278364	13.076331404488	16.3826891870657	12.496178975991	13.006679591656	13.044973974677	14.5972300454573	12.8446829855781	13.6279686307241
5.38x39	6.55x55	10.2412228273776	13.0354560334497	11.9768410275832	11.9686011296225	10.5722623406724	10.8064737541901	11.258610837932	11.0688050393889	11.3874325903603	12.55935698991	11.3500182378708	10.1963419420888	10.1812769827758	14.651670860349	10.7383995548685	10.1704362246661	16.4842200907413	10.4600974182844	11.8284654964201	10.0642704156834	10.1549232887304	12.1749456672299	11.0911388504517	11.1322107418069	8.91407252606798	10.6042748927025	12.9363916530074	10.0541919615651	12.1000276859187	11.1321400458313	13.1940279672282	9.71473792749964	11.1180546409882	9.34403055431648	9.59385324048685	12.8034075932933	13.2969717605175	9.83255658514102	11.0185905178476	11.3718442215852	15.5452579586188	10.2511954912586	10.5225936916713	10.2958234736227	14.1240569596699	10.8747574225819	10.8436557488699
5.38x39	6.58x58	12.1313347575607	14.2768934996378	14.0611569936474	13.3055712391464	11.5716709683606	12.8114556549988	12.9534219031112	13.4928878302608	13.9759151757586	14.6349476937911	13.9159329187805	11.3866618901239	12.105609526166	15.7152247518131	11.053287339068	10.9855702173351	15.8033663818821	12.6648649420355	13.4333031306526	12.655054563296	12.2880583494708	14.0544817762876	12.0640029011933	12.4421265867214	10.5096273007181	12.8734875228121	13.6292327370252	11.0978605595853	12.7711146342048	12.9803955640805	14.9564780947922	11.8062705796538	13.2669839074298	10.802904146571	12.367424994719	15.2754247404123	14.8029533539764	12.6950207561863	11.5334578076135	11.9894814733582	17.5648800166696	11.6935924334654	11.5655060416741	11.4352312176012	15.1547491236246	12.3661417184181	12.238651478002
5.38x39	6.59x59	9.80130302561858	12.7266384014004	21.5362788336333	10.3056476749402	9.35778253647732	11.0229885239893	16.9505514069602	10.4207341871866	11.0416919899081	12.5498657761747	11.010086375683	9.02132096757454	10.3280792502769	12.5281522979249	7.55388674789343	9.28212777330715	12.0132078563554	10.2372286288819	10.6918228099796	10.1137054534923	9.55994089939891	11.3670233130754	8.66545901842482	8.86144469034254	8.20488957878167	9.90284999381491	9.94786942013213	9.08437328603355	10.7578989119623	10.1948103464459	12.8173985660117	8.96860228798223	12.5905345795959	8.59277207890445	9.65706005987329	13.6869472491129	11.5551203368896	10.6121893122956	8.16928999362858	8.96076274655233	14.1174179296357	8.92321769318669	8.78452554211097	9.25791180558553	12.6980065364608	8.84953377303008	9.66650117674435
5.38x39	7.35x34	17.5929499800346	17.0244032494534	18.9400228352555	19.6646534167272	18.8159682450838	19.4032226704741	17.7860407623507	18.5827005034252	19.5256755580953	19.7977615148784	19.2253987474903	17.2138585447888	18.5151774768702	20.9803779517911	19.8482398715856	17.3066094599722	23.9134794833374	18.0741642130418	18.9876701309034	19.1592910359439	15.79461392374	18.7964812930506	17.8376149190412	19.5060173536271	16.036228640176	18.5832342717838	20.8081206743906	17.2527269148967	19.2465570427544	16.2294893635012	18.2241866759535	16.1021472170639	16.6044794558577	15.9044179396795	14.5330188536312	21.7515000402271	19.7475346815748	15.6491982542238	18.0734318545206	18.706436485873	21.906405387466	18.969272679784	19.4356998587651	16.8009933932491	20.9426776225009	19.5240049426341	17.4290450398179
5.38x39	7.36x35	18.9678241767473	18.2018599324355	20.9180733338422	21.6280690538938	20.0808422383126	22.6216301357793	19.4998279736002	21.0309283913003	20.751409590676	22.0187041171818	20.7023008383126	19.9175492970395	21.1170409148631	23.2266127750044	21.7645897962723	19.7849171845626	26.9329667693702	20.2806404484671	20.4559457371201	21.4606725197511	17.7651342240919	20.5993307901009	20.0187596768631	22.2992473639807	18.294565996492	21.4375701514887	23.5671812909393	19.9372984629312	20.640044307123	18.5591306639077	20.1140161578935	18.4619734860605	17.8356856330224	18.2070288075787	16.9688306314843	24.0372775912748	22.1259235513458	18.5584318572448	19.6748430489293	20.1691322817815	24.4692883631707	21.2825314988607	21.6271680300496	19.6142823982933	24.092290841678	22.4015695432262	19.8002193169672
5.38x39	7.39x38	17.878518227191	17.2462256450506	18.2482482994944	19.1723470133419	17.5512256267191	19.5047557534054	18.0799141037783	18.9078462813722	17.9927302541888	19.5491472192523	18.1752242627154	18.2048132646287	18.9508194281936	21.0717733947573	19.2587981452634	17.8272709352834	24.9920515564449	17.9312543621466	19.1879170573567	18.5712068805449	15.6645660648484	18.1384483625254	18.0448408693455	20.0654982993197	16.2713902602083	19.2733811512148	20.625098617946	18.0205757122241	19.6736778971295	17.0605580506618	18.2924321783627	16.52994001804	15.6687881152309	16.109042771065	15.4165317435537	20.4501797302615	19.2759561630545	16.7809137117143	18.1262230759748	18.5472170149594	22.2711527766301	18.3224293422024	19.3680194650873	18.025541018233	21.8027080198768	19.7779871827241	17.3629386049712
5.38x39	7.40x39	21.4698047033502	20.2995015456045	21.9025856464482	22.9023556430338	21.2045463285589	23.1581893290473	21.7647691694628	22.5759910524433	21.506755217838	23.1167109468454	21.6689601273342	21.9236935984792	22.6545723640946	24.6638340490687	22.833775990843	21.5265760166358	28.695514980568	21.5981510551251	22.4731500684706	22.1394441212963	19.1554630849792	21.7655677849212	21.6844126736234	23.7510430507799	19.8646665212382	23.0451568447689	24.2066147364723	21.7640766401885	23.2206001860417	20.7095983785297	21.7100663518102	20.3003555880186	19.0196788616422	19.6730605143175	19.0909981928657	23.8230498047584	22.5876618754576	20.4418267530082	21.7658233476246	22.1126751886785	25.7553975896316	21.9190182490001	23.1339983141696	21.803569088569	25.518048318788	23.4276719287257	21.0240974598198
5.38x39	7.42x41	19.8751629175713	19.966571187863	19.5665386565943	20.9958268472571	18.9079085305594	19.7310205767467	20.219554050473	19.7193348265097	18.9196450812377	20.8144616553011	19.0832890770957	20.3669160650306	20.1985283622347	21.5355004121102	20.7165810161812	19.9477922838594	25.8887093730066	19.4464672884306	19.9250103387677	18.8091232384713	17.5682873667299	19.5770872450424	19.3439287374618	20.8721204241447	16.9034975670717	20.5840268412184	20.8115868928825	19.8623157008441	20.9967844442905	19.1733379722989	20.0616555149369	17.9910271524446	17.6809777444575	17.7468238003311	17.086138650965	19.9778606712531	21.0912511956972	17.4829542984016	20.1471688581796	20.6827025313425	25.7665868907778	19.3956622212287	19.9329465458572	19.9692060182672	22.6770579440985	20.4971645112196	19.9212363572144
5.38x39	7.43x42	21.3051013844103	20.5805089344263	21.2659704927849	23.1600778496101	20.5855972951965	22.7289904967203	21.8376999246715	22.1340231544109	20.4518936287083	22.6376734007716	20.8730501364798	22.8503338050016	22.0999042531863	23.176295497771	22.4674597807585	22.5582694593357	27.1582994681184	20.7467115466524	22.7206468877979	20.8975372950977	18.6960914364474	20.6008056638569	20.9794923913807	23.5588548108774	19.0495056103826	23.1378018402786	22.9628143092261	22.3152119640392	24.0300369745866	20.9032116671099	21.0170274539479	20.1134574849776	18.697480284787	19.5570690288704	18.2338423816814	21.4527979760217	22.2872333186513	20.0014324986987	21.8093584729125	22.3177384606953	24.5300172441847	21.2038191371272	21.9084760309794	22.3759626608555	24.9048873918354	23.5044527696349	22.2922105902488
5.39x40	5.42x43	5.7499778260442	5.00808156882453	5.32145365478269	5.56660947076405	5.123205832289	5.08004271635584	5.54757694854249	4.9790545287233	5.38852725705271	5.35079601554759	5.03851545596518	5.2296962626906	4.90757832336887	6.06421149037531	5.4913724149797	5.06128185344385	4.99549396956898	4.86656316099976	4.83375061417115	4.82558980851046	5.29289863874229	5.12709761951146	5.30353071076241	4.6429487397558	5.52286492682919	5.12672166203706	5.12850494783811	5.06178199846655	5.25863489890675	5.19249179103829	5.11703097508702	5.20146373629577	5.58605576413269	5.42353620804728	5.19917435753024	5.22938667531863	5.12310579629193	4.96470673856976	5.51898985322495	5.30738786975288	6.05775981696205	5.22961671635694	4.75996060908071	5.00248398298286	4.93373661639938	4.85388153955162	5.17680065291295
5.39x40	5.43x44	6.06521805049085	6.36755793063557	6.01172945166364	6.21903159663946	5.97701263174171	6.05794990075025	5.98316254166641	6.27288713432659	5.91439405180277	6.39402846412182	6.15538772133811	6.30129240711776	5.91244272699533	7.77098764636774	6.03536055260993	6.13031296101594	6.27408049039857	6.01149041419847	5.81026651712295	5.87964429196189	6.1239792618852	6.54108026246429	5.89254223574172	5.92259807854627	5.05665373542623	6.13039101526159	6.23977731974467	6.27357728891579	6.23596095241143	5.92456023684459	5.75603431191997	6.15416744978555	5.90524216268901	6.15177584116977	6.23826578465522	6.14567408833238	6.23689826756858	6.01267902020389	6.20207465288834	6.04852254687043	6.41208647789471	6.43716319507281	6.09081767909695	6.1827655624324	6.54900923804509	6.11790250004035	6.31366042799262
5.39x40	5.46x461	10.6584715602191	9.90870299282404	9.85599127434679	10.6263274935417	9.85568713992079	10.225234911727	10.5192677501811	9.92172192716567	10.0895396327087	10.716766349977	9.95390446005988	10.3856681056155	9.59168337675927	11.4561854908167	10.5542703205859	10.2182187293089	9.99099184265506	9.71099201935621	9.67187887641279	9.61649057608856	10.1775060795855	10.3318156197253	10.0676611981135	10.2166370690164	9.57382692552983	9.88550013909261	10.2253970094075	10.314178057412	9.92350008817454	10.2999195142486	9.64210153441666	10.0501703965654	10.3245889990837	10.7188902877117	10.1663508694123	10.6502800432665	9.89381079261171	9.92219839551699	10.5364358774682	10.6268939488451	10.4645734265664	10.3129327545563	9.87347162856105	10.1001956911735	10.2656031970849	10.3403711248678	10.2467921809706
5.39x40	5.47x47	11.407171647696	11.4959517222368	11.2288376513333	11.661791200326	10.5408668523988	11.2204536004566	11.364523483191	11.1536932896687	10.9168276069562	12.006936162069	10.9847518861374	11.4841946169507	10.6504145928691	13.139552884326	11.5743746699336	11.2898932235872	11.6795077807243	10.2241175169302	10.3824651215403	9.94757201532113	11.2645699429672	11.721427643423	11.2352485508777	11.3361715318709	10.3651218034329	10.6309930862549	11.0819334504409	11.314535164999	10.7116110366275	10.9244478579011	10.648757955743	11.183885013715	10.8719854212559	11.4055639492311	11.146036829295	11.6873905556373	10.9047540549982	10.751325406665	11.5311321647096	11.5761127758847	11.6934263156698	11.2174674503651	11.0704714895076	11.1983229101504	11.5463849753938	11.2633360067078	11.3421628448899
5.39x40	6.48x48	15.1337221462534	15.571430634338	14.6454176792606	15.6758824313019	13.7251291068609	13.8609859678163	15.3511950023443	14.6242279796234	14.6814455010397	16.2070892513122	14.6729122535371	14.8956416108874	14.350298603165	16.3560907615481	15.2542784490123	15.0155778110601	21.6438459613813	12.7101385122272	14.2553003826647	12.9075634416415	13.847191809172	14.8612920703416	14.7121546008734	14.9667661169673	14.4999056893485	15.8404524240945	15.0648161621707	14.7876991110855	15.6547724672063	14.4163728101073	15.3808291714069	13.4368552124372	13.9618226245716	13.0085381576871	13.4306212812364	14.6803221694893	15.7846822584428	13.0753766293748	15.1413321078431	15.1744244701405	17.4023220002389	14.2296773680924	14.439821882558	14.9182254306603	16.2231058062259	14.6156872229807	15.0388868604029
5.39x40	6.51x51	12.0994129609663	13.375204409653	12.0092195416688	13.0406663173321	11.1035239000959	11.5260654605117	12.2586969128044	11.7047633893215	11.9341483986081	13.5223974945274	12.0339393799371	11.68865201809	11.5819560524119	15.0729454653031	12.3343382878856	11.7097553347626	18.9628812684149	10.1955050389865	12.4194103322179	10.4422157131521	11.0314538479749	12.1829760321524	11.839987753372	12.2319157125938	12.0076663844396	11.7954122437497	13.322644069403	11.5201516483074	13.3702304019041	11.5167913500245	12.9789583942626	10.5269872233227	11.3228814795528	10.669969540725	10.5263876044919	12.7835697674789	13.9320135299963	10.2221634207246	12.135192993933	12.2647058260686	15.6210830930509	11.0840327047515	11.561692869126	11.4467055959346	14.4524930375351	11.8968821545815	11.9419242586779
5.39x40	6.52x52	9.55727131560049	11.753378620635	9.38210221645448	10.6806467032666	9.18485084255591	8.44545611556889	9.67849704241315	9.11572493003162	9.33918642066856	10.7792958026023	9.37017747964253	9.72182632019313	8.91418044466231	12.481026039553	9.58553874333624	9.59597749059469	15.7411637117463	7.78808866153949	9.5875236114442	8.00560965823341	8.3019357983545	9.74244512430015	9.44051121497136	9.66104906311939	8.84555922483141	9.54701424530204	10.4984188333291	9.52127874815143	10.9204930749486	9.03752958501382	10.820882126703	8.23794155114007	9.11329803089968	7.69004980478021	7.78086376953099	10.0016081206974	11.11988178894	7.57165536722321	9.80081450696829	9.41474561525695	12.730907155423	8.91889595185413	9.37064597559848	9.50266220592945	10.7952029161105	9.2430594502037	10.2481157780345
5.39x40	6.55x55	6.43945906113239	9.30922520943607	8.27527455737875	8.31831389164896	6.85517038446164	7.23848444082047	7.48078451768262	7.39476585160071	7.82255015963464	8.74784442019861	7.69171983369129	7.01051859707968	6.35303817082819	11.0204393288108	7.49347669643404	7.00610226873688	13.5616114086785	7.30981230949195	8.31551688110847	7.03456054064502	6.78903704511914	8.3513227694779	7.32990074966913	7.55103125407384	6.16600170288656	6.79757699478277	9.27087083288296	6.89924814744331	8.26130413433618	7.45110703184433	9.45959058310665	6.23783247610899	7.40722842904146	6.03971812256168	6.36655448417745	9.0583517264456	9.69360304530777	6.51322930657289	7.18062260531773	7.61821035414487	11.6727876276406	6.40070035230521	6.74546825654083	6.87278648002395	10.5827653285897	7.19156102664783	7.51801077413434
5.39x40	6.58x58	8.77515281918213	10.950285841018	10.8135001733944	10.2287774929363	8.79756540185977	9.91903090024424	9.67317455647317	10.2886893723156	10.7310141645606	10.936475940631	10.5579074157714	9.34515580394463	8.9674862140959	12.3492149143174	8.1013616756691	8.98126410924431	12.4630898656794	10.5977309835644	10.7456781079651	10.8175648368753	9.45213187593148	10.6191710599274	9.0924539041999	9.50671778270503	8.24438584735091	9.44199989409023	10.4360800111919	9.04269815928852	9.51141025295408	9.9424602086204	11.7767698033035	8.90446674428065	10.1417170143916	8.28081505650259	9.35358952488295	12.2719542453515	11.3635514695011	10.0363404186984	8.20998739341298	9.06605526124786	13.8902462901131	8.516208663484	8.6677858764508	9.07553822095417	12.2507975250593	9.2797884674167	9.82371772802945
5.39x40	6.59x59	7.06831981449623	9.50187713033588	18.5194564175086	7.88786263825632	7.45170839472399	8.84910786463811	13.778992924013	7.738833245393	8.1604069751453	9.33817632088836	8.11765347868459	8.05934128821953	8.11347139022503	9.57640725951022	5.0511666969127	8.53154675308059	8.72155095152233	9.0734142416182	8.746009032696	9.19549460333701	7.09674580353559	8.40201005712324	6.28768001730368	6.44526345466188	5.79520776159061	6.97268305604091	7.02391094761316	8.26600719815801	8.15419014985547	7.66859100487176	10.2543535144835	6.65642591786313	9.67237618168359	6.64538998103196	7.05695437139847	11.1830157381629	8.21623819031557	8.35505002977241	5.27244506846681	6.76605623683398	10.6154176083657	6.30140603357695	6.50334029557119	7.84004846923793	10.4722755406836	6.34982275343178	8.23694463985282
5.39x40	7.32x31	15.9904338277609	15.0688755718534	17.9656099534639	17.917654254952	13.7833040306017	18.4325170012128	16.4723956363366	18.1341413913094	19.7079159984002	18.4716638665822	18.8431143126607	16.1239798436986	14.9173538202994	18.5193897847634	19.44093377387	16.2236990233424	21.8734817073094	18.0785348134189	16.993754882309	19.7567998673874	15.5110736249945	16.4016640924023	17.1649173024515	19.3146395513869	15.9774772414171	24.2159780310439	20.3488244623614	16.3745714142386	16.3202042266633	14.7420493148002	15.1738899758763	14.2512826791135	16.8194875070556	16.2546506883415	14.3301333210825	21.4738723568899	20.7709840161703	15.8728991995791	16.6580702964059	17.8975165875045	20.5885700814797	19.2319106955081	19.1961078607097	15.5819039273126	19.7239524690159	19.5971354539382	16.6279820182727
5.39x40	7.35x34	14.1634851996251	13.8592771095754	15.5409871951559	15.8795249614086	15.3172834732533	16.0837851888167	14.4127106749563	15.2616886680341	16.4708966361883	16.0601754971731	15.8519693729202	13.71616236416	14.9681900709471	17.1645043913304	16.7904567537634	13.7901336106653	20.9268786253469	14.6767559767137	15.4990441640767	15.8579265983924	13.1980843306898	15.248736373877	14.3366049677042	16.2382454717251	14.8080416328426	14.9742598815434	17.404353507097	13.7380757386178	15.671962289388	13.0920346394287	14.6441071424652	13.6569773376103	13.9187028849674	13.2097737300833	12.185548859202	18.1663958450761	16.6285533946883	12.9479346229428	14.5066324486422	15.2045028198886	18.2258674690671	15.5145981578641	15.8351006627681	13.2516229949392	17.4268788083237	16.1176431279514	13.7962738085325
5.39x40	7.36x35	15.9320860529938	15.5507489530247	17.7863503282714	17.9267367917309	16.7143622373096	19.3631761340954	16.4313336646786	17.9335135988462	18.1152551734719	18.4914919084427	17.6846703672983	16.3562360584579	17.7466140432478	19.417259976629	19.0917782042428	16.1914221117232	24.166690526425	16.8822624964784	17.1746604333244	18.1153113691154	15.6878613265161	17.3686741290175	16.6924709674751	19.2096931261278	17.8198257286653	17.9845918774934	20.3143836972722	16.346227791145	17.3772240878686	15.8320902283937	16.8118581364464	16.3721600896155	15.6965405742794	15.9884979281983	15.191392595809	20.5848007034316	19.3162441742695	16.1304830677819	16.4438740873311	16.8665676709875	20.981366089938	18.0784745208217	18.1692008354798	16.0940238908733	20.5798385562181	19.1547066539793	16.1585401877769
5.39x40	7.39x38	14.9261584475042	14.5095823165245	15.1532440751147	15.5140521141319	14.131606171982	16.3902222376635	14.9587479088325	15.9206886157603	15.4738796686545	16.2868665187629	15.3263979134042	14.4446136673848	15.6667998008528	17.4088151808215	16.7043050139777	14.0578292420985	22.5783859697721	14.3737573723783	15.7539643899559	15.059928485886	13.6222828116289	15.0349200529966	14.6986416379202	17.0595234106935	15.5364559987148	16.0397019298988	17.4326272833443	14.2581273665233	16.2725945687834	14.2700523124479	14.9251480729673	14.3762885335541	13.47239343992	13.9265747044993	13.7630590712966	17.0641377455763	16.5812333678771	14.5084720766868	14.9964725519037	15.1440254556046	18.9456123152565	15.3105258890738	16.0058718600394	14.3742432844307	18.1796539571027	16.6889968542151	13.6168288892826
5.39x40	7.40x39	18.6666300654403	17.8730900238319	18.9071603896513	19.2994606401319	17.8454437042064	20.0067475867518	18.7565815115655	19.5986016082781	19.1375638470522	19.9859740067879	18.9749929380751	18.169564138966	19.4161143898567	21.071784594571	20.4128535486835	17.7721100885629	26.3542750232292	18.0356211148937	19.1073377266431	18.5972710632501	17.3345239623129	18.794926469662	18.4187415693907	20.7189243687987	19.3173718709352	19.8132090535582	21.0748061438297	17.9992370116069	19.9299813597504	18.0240624998916	18.4916985428597	18.1509505536212	17.0964786432762	17.6444683116267	17.5947328482134	20.5217373046241	20.1228051970892	18.0217318812594	18.7579728648913	18.8080010633773	22.5496699975853	19.0220151140724	19.7861017383415	18.1638028507248	21.8951797663321	20.315749678513	17.3207821416933
5.39x40	7.42x41	17.1649609670398	17.2878374876675	16.6343087923725	17.5833479747174	15.5899732841336	16.8232977444971	17.2480262928835	16.9859466913093	16.5502187296724	17.9825799595053	16.515583973932	16.6701296935567	17.0944784360331	18.2527952379903	18.3607514279781	16.270666765686	23.7789655157662	15.9683999824654	16.6207334374871	15.2260791407375	15.6319891888397	16.7128412007055	16.1184111810066	17.9333450867372	17.0082886264315	17.5922691543757	17.7540484960473	16.1878728065179	17.913286381901	16.3768182807284	16.8318370358081	15.7448794533334	15.5295946502154	15.6505786155017	15.5065865360498	16.7921060918516	18.5855436562937	15.1158014673387	17.2548169796147	17.4559675755886	22.4717183588617	16.5966918691648	16.7665574880475	16.3809167631119	19.0678646942965	17.6041737096633	16.359998594132
5.39x40	7.43x42	18.9945061794194	18.4624801150875	18.7503933558739	19.8817501493204	17.5953687656724	20.0678322446646	19.239472575931	19.6766600316212	18.618211326548	20.025134681195	18.7482694134685	19.2219313545752	19.2821461720422	19.9809433460986	20.539583759171	18.9531272617476	25.3695693696208	17.4059966103639	19.6403060566784	17.5819945967458	17.3921900863577	18.174219598101	18.1016054812826	20.9094813182919	19.8349277790467	20.346472937588	20.2302247639516	18.7046049410299	21.1258532845421	18.5504335798385	18.1431214789517	18.3655312201962	17.2104714926698	17.9806113633547	17.3416494025222	18.5989986020753	20.2779429183534	18.0668572529923	19.2762791793437	19.3772455730942	21.7442543675335	18.7971500499411	19.0319288039862	18.9300676702435	21.4668648153381	20.8475366650355	18.8333680737143
5.42x43	5.43x44	3.81262599791797	3.82043989613762	3.81304156809233	3.84905144158921	3.83519412807227	3.81086092635247	3.83402034423397	3.80148405231431	3.79333006736825	3.8640520182834	3.82241729799351	3.80011749818344	3.85260145875485	3.84223320479119	3.81196143737053	3.80742340697748	3.81172690522288	3.8130688428089	3.81769799748487	3.83090642015698	3.79731773756161	3.86078243365254	3.8225797571797	3.80252403016733	3.82142722029349	3.80284064877823	3.83453074052093	3.81023109535367	3.86554317011206	3.80020381032386	3.80457369490985	3.79005461702071	3.80775970880517	3.80779345553301	3.85801321926195	3.80396464231728	3.81534284173782	3.81148422533795	3.90224486674017	3.81092652776198	3.86340821037591	3.8873179700148	3.82381707198448	3.81644887297079	3.79400013178703	3.85521166734072	3.80848066819303
5.42x43	5.46x461	5.66289687350918	5.14957105009728	5.06795984593406	5.53086512220285	5.18635411440445	5.42291093417548	5.72781581407782	5.14464245599245	5.00452335392693	5.78739621937189	5.05543291914748	5.80777453074756	5.13305630204852	5.55439366627898	5.43929416376794	5.92037600157287	5.29728288842497	4.9099273925385	5.3707096365378	4.88989140983724	5.38126657953311	5.49768987848533	5.2649064569088	5.97544492067327	5.17162440631568	5.11234055986101	5.2517062941486	5.69174735911565	5.05253609586315	5.5635895786803	5.57673901128607	5.11269987384357	4.95023686301979	5.62722329395237	5.48728147628678	5.99628134763538	4.8626997645341	5.08409146259192	5.62158927706392	5.99600041694462	4.69284103715436	5.18020472568411	5.18080968575376	5.55803355513441	5.62965132135197	5.81406234916689	5.43082986292151
5.42x43	5.47x47	7.86969541977325	7.6110840883543	7.45795320446569	7.65583078444136	6.01533058110691	7.41600546116304	7.94314396193346	7.2015224779209	7.02970347881047	8.1170638780288	6.95177401819133	7.97530946108049	6.37566733762043	8.01421792815743	7.59696347233551	8.09724057935788	7.87058765277409	6.24568058741399	6.29328761459382	6.22838502342301	7.72959455599063	7.8542310890373	7.52715125396056	8.00876744574345	7.64811094323298	6.15875872234008	7.13403041765313	7.71253453801019	6.21638882310301	7.43198641010598	7.72103127826847	7.27920689361142	6.73813060128698	7.49481047125278	7.68109738253591	8.06393557761965	6.79585461880991	6.89162977821647	7.86173657660952	8.24283331142878	7.06110536672552	7.03370933434131	7.15898386644362	7.74347790078851	7.76340524512279	7.744132101146	7.4973047823868
5.42x43	6.48x48	14.504037679212	13.132701816458	13.2911058230683	14.3323456210071	12.4532065348648	11.9460680560593	14.6835225337792	12.535704687013	12.5747339534481	13.9795345416076	12.3427105612989	14.0084478797617	12.6547324349431	13.2096214177394	13.4522393674808	14.3502502765631	17.8767434394523	11.9524965592967	13.4346806437667	12.4888802140144	10.8693884372581	12.66361583435	13.5051454268364	12.9925012603424	11.8633485154909	13.2982856789889	13.0204998751968	13.6937984503935	14.3328563796614	13.5214934826002	15.4259214959755	11.1418004379903	12.3884767425217	11.151940907304	10.8597387629722	13.0398284497918	13.7916595448119	10.9278767837124	13.5877752042047	13.9094145814984	15.1145575191601	12.2857846717253	12.4987796604309	13.8840666232916	14.8402082532557	12.6399930775298	13.6768033180272
5.42x43	6.51x51	13.553712886143	12.8092607124689	12.737577987985	13.6971425122176	11.9466919689092	11.6133392699947	13.5993760886299	11.6176618129467	12.0962364394881	13.0795652068408	11.7413012481581	12.8330225979697	11.8235790266738	13.9951958900188	12.5014283183963	13.0473443274867	16.1917656233037	11.7699222597263	13.3864130371059	12.3122304234448	10.2284506158069	12.0124572423797	12.537823734604	12.0178847972511	10.8053009675807	11.239712852204	13.2334619053368	12.4911746845523	13.9305995563723	12.7590233168531	14.8698454934811	10.4063740563176	11.9868865849311	11.1200496851408	10.3152984445434	13.1240044574817	13.7558199319415	10.4355304608822	12.6679891853443	12.9949536744076	15.3091116985931	11.2273107198474	11.6629593585848	12.4253356091496	14.7928847085347	11.8868864300119	12.6437605956456
5.42x43	6.52x52	10.462665912663	11.1230475140584	9.7676992685074	10.7452073502562	9.25198038259918	8.7496629077925	10.5772754053206	8.51725102365781	8.96673837022136	10.1161051793662	8.48412387934075	10.0392260657881	8.52820461762029	11.3447992489951	9.28077248939979	10.1901394494874	12.7136073165723	8.9405513252819	10.1679473838135	9.50536022463115	7.45158654247537	9.35302961611905	9.64628622838862	9.0789932261237	8.19972895893517	8.42245130588477	10.1837125352201	9.77534592738283	10.9807720129324	9.93137261409519	12.0960584489329	7.95544065404299	9.77970336973469	8.28957483831348	7.18292050631218	10.4351370858269	10.6871493860617	7.88497596698937	9.74395084141951	9.82357679259444	12.0959965691133	8.56391043857886	8.78308038218938	9.81032196209686	11.0492438202802	8.79315222204188	10.1089973785732
5.42x43	6.55x55	10.0946259960436	10.9565423834347	11.3442089190917	10.8902173072901	9.70023685277839	10.1985789696408	10.8759519583345	9.81208306120571	10.6014333464867	10.4254493428341	9.85042922922651	9.64195436620605	8.86555689170173	12.3350906766023	9.80360596923397	9.75875468489704	11.7162673236829	10.8038073381563	11.075468297097	10.718916969545	8.98251412467579	10.7025889391306	10.2629493324288	9.40757099361998	7.74502420912937	8.58004020969599	11.3794601365794	9.58609002670015	10.7716688122129	10.8335993557081	12.6368117023243	8.97696713818203	10.8808324130096	9.39973095359647	9.25126726454273	11.8987966198267	11.529596740563	9.78919572794415	9.90952128006192	10.5697218979498	13.3337079989026	8.89076295938656	8.83033255319413	9.50255407772037	12.9293772858557	9.47372545517337	9.89232930102916
5.42x43	6.58x58	13.9232034388642	14.2324779641495	15.1475365984044	14.5514811617237	13.0112945166882	14.1198516281156	14.5676104423478	14.0139489438202	14.8749484368854	14.4747257659688	14.087861903071	13.3582339401584	12.8718747663268	15.512765839785	12.4902037613483	13.0472135339313	12.6090783564859	14.7783625953622	14.4622596782107	15.0571563716394	13.360742681453	14.3294066869497	13.4198471675351	13.0517421825594	11.9571208491008	12.9444536771546	14.2482009039738	13.032718941188	13.5290720302614	14.4433270405402	15.6567839928895	13.32537462888	14.9557505662538	13.2036256763057	13.5072138874011	16.416903301171	14.8436464859549	14.3443552660968	12.8803870283466	13.7178604016807	17.178608965804	12.8147641804288	12.3029788669249	13.079300745835	15.8008382372582	13.1771425582332	13.4292561595942
5.42x43	6.59x59	12.2371611904069	12.9597848747578	22.599312932034	12.3905618113143	11.5353991695129	13.7087367032852	13.0968647393183	12.1307544695291	12.9961969821944	13.9188678059676	12.5073577545379	11.7491319253807	12.3414544118592	13.6735040498038	10.16601524689	12.1865971460453	9.00016727622326	13.1218722368418	12.7649674108476	13.3464675476322	11.9174866897345	12.6129316576282	10.9549335917659	10.6337653726232	10.635891594032	11.2107131798115	11.4722432854259	12.0552364555823	12.272065922248	12.3936978743231	14.0452500867731	11.7101291623961	14.5642586491726	12.0501563890267	11.9848902790138	15.272892194997	12.2512881363553	12.990188066383	10.2330840903415	11.837086254649	14.5931706287565	10.9126013855542	10.07592963453	11.4934751054675	14.7558305086498	10.9047362645779	11.7749082374344
5.42x43	7.32x31	20.1752169505064	17.6690136114046	21.3924604942956	21.4670607443124	17.6343437643707	21.0581099104359	20.4257445886313	20.8817720512412	22.4051653196311	20.8254378585421	21.2911146021057	20.1281453939502	18.1777178435578	20.7901390808239	22.1283927342227	20.2255154198849	21.4448461407397	21.7289705692654	20.3509901970396	23.2911295131859	17.9569253771351	19.3940437505952	20.9638406309531	21.299234117686	16.7634446937376	25.7988200311565	22.4848696238159	20.1375967285076	19.9618762895676	18.6363916303559	19.4661349784697	17.5930484851262	20.2023106351724	19.9928470708901	17.4775103776253	23.974893555551	23.4041751830736	18.6560245497266	20.0121120574516	21.0663985056772	23.4016397716058	22.0107120738971	21.6838964671943	19.2808225446945	22.4232138196111	21.7449790526457	20.2993994246135
5.42x43	7.35x34	17.3981411650785	14.9646066102654	18.0913453894397	18.518958016044	18.2255955458251	17.7886086021364	17.5664145744087	17.0389953048881	18.4005510243579	17.3017935775456	17.3854096011569	16.8317606030979	17.1580769027301	17.9114876545752	18.546901439324	16.9708916972562	19.4566864856275	17.6869278564707	17.8392675578343	18.8922804605479	14.4619435070118	16.8924263206918	17.2665888350884	17.358972579044	14.729159853841	16.5763549672417	18.6966390027727	16.6132364697551	18.0887892629662	15.8169209392979	17.9616879496332	15.4902249499483	16.5248537966301	15.6807584319127	13.9864872287505	19.991108698619	18.3099980611687	14.7031585042126	16.7956456857127	17.6304379979625	19.8365691842113	17.539271222032	17.5475101937568	16.0338243098769	19.2739120574937	17.4963963718247	16.4935134522636
5.42x43	7.36x35	18.5316683274874	16.332317410582	19.7955266916544	20.1080202158243	19.1557429769769	20.4771691402889	18.8840298135753	19.166915505631	19.4978256736488	19.165664950635	18.8056889796678	19.0260896928402	19.4599764388347	19.6112855774424	20.252094607719	18.9565934175948	22.4213079680914	19.4130250605103	19.4628961359814	20.7520764503218	16.2959932805583	18.5791850467129	19.1808816533547	19.8267647638237	16.9149925805482	19.1603484832609	20.9799368445189	18.749051336001	19.6386937447479	18.2620851492922	20.118629327069	17.3609147512451	17.5480463015117	17.896793595502	16.4587040498333	21.7958987197133	20.5635142910933	17.2308732512314	18.1395730379742	18.5621571214124	22.4817754859353	19.596547706165	19.4236376098814	18.3941237627673	22.0236834793819	19.9647026774756	18.5366610261935
5.42x43	7.39x38	16.0465292509003	13.6555927736587	15.9221720566008	16.2725735518387	15.355295926813	16.3568924615894	16.0825876338355	16.0320266342094	15.6986653572844	15.608733805149	15.2834860879316	15.8774714296704	16.1756483950412	16.1931064654068	16.5826223800701	15.6133379198684	19.8843928999605	15.8791010450844	16.8574099137442	16.8743692919173	12.7214166270899	14.8641968165118	15.8423466064848	16.5316209126631	13.4140301923024	15.9713825638233	17.104109243103	15.4273567729537	17.0705450703837	15.0869097564743	16.906965458059	13.9409832149673	13.819253163612	14.2921113205852	13.3650083800946	17.3752481996661	16.7420910581683	14.1638873548189	15.0090586646865	15.269457914412	19.1756761028132	15.593796843617	16.1635753779911	15.3350010107597	18.5862413898023	16.3867886420738	14.7238396486786
5.42x43	7.40x39	19.4284670265052	16.8636551791123	19.3085689526697	19.6787403052126	18.5953246005548	19.6083370279073	19.5019995897857	19.3097797242744	18.8891314252403	18.8760365278307	18.5045221229839	19.2349299452844	19.5170350975757	19.354426599618	19.8786222108073	18.9889250090678	23.5154367171864	19.0747041916775	19.723253737657	19.9157940840932	16.0398212271833	18.2926980240751	19.1616551216225	19.8644861499109	16.8413072236095	19.4636854166933	20.2693341035171	18.7873634659044	20.3015423552005	18.5066553974509	20.1087039114907	17.4179132217381	16.8870457155774	17.5415643829164	16.8402179914632	20.2582003889783	19.9299426491899	17.3158011365342	18.5437272682705	18.7943526092281	22.2935804437062	18.8557845766226	19.6052183104397	18.8432719027243	21.9910932879655	19.6216844587818	18.0924703951672
5.42x43	7.42x41	16.7481492708896	15.165332373542	15.7875471812438	16.6534038262453	15.0091933494109	15.3626647753572	16.8439571657019	15.4408731942206	15.1286630605616	15.7908731234216	14.8128760880526	16.3559827280418	15.9770792700043	15.3589560517634	16.6647488429919	16.1959116754816	20.2598424722405	15.679981983408	16.1171950723443	15.4622683006084	12.9819624864656	15.0046759711765	15.5625739837599	16.0974833747391	15.6875074183249	16.0376327741971	16.0298434490172	15.6485393887097	16.9718285402605	15.6948946476235	17.3346525203132	13.8515830864201	14.0283245257586	14.1752264884904	13.4007430391005	15.6365061954389	17.1967511466556	13.1743388069383	15.8625816309956	16.2118124218114	21.4074103057796	15.1984324849637	15.4611876969397	15.7969400201431	18.129175629355	15.8111750986446	15.6118963294021
5.42x43	7.43x42	18.3477974699962	15.9580827482502	17.7205144959169	18.9874504344317	17.1005416288491	18.4844650720544	18.5862033508729	18.2985475379878	17.0451707236977	17.7135752743482	17.0772367788234	18.9584689782693	18.2942533600035	16.9440255547494	18.6589714078778	18.7518627074752	21.793027554702	17.2218352390214	19.1546383155621	17.8623936525876	14.7596077183643	16.3445691897951	17.4694867984151	18.9181048733746	17.7455172085797	18.9650406274281	18.3400461558852	18.238938428538	20.2564941685377	17.7006084923655	18.631975445454	16.2683366697398	15.3543267517661	16.4814108619378	15.220639079881	17.2466032597726	18.7848189238012	15.9955818274922	17.6989205885557	17.9721274199801	20.5017664117022	17.481738614909	17.8632978198316	18.3108771499347	20.5498193179405	18.9745447639726	18.1728965770457
5.43x44	5.46x461	5.30092727737327	4.95048734974649	5.26220514613408	5.73360985767256	5.69745776640775	5.70547824463471	5.37938602444554	5.56251786513985	5.69026299919433	5.35985456892256	5.79403434577325	5.19950593806758	5.46456485001322	4.99089380772623	5.74269300938157	5.05843266239653	5.12941887546728	5.70653879334925	5.6100864520968	5.60252425251333	4.99408630281857	5.07693893995191	5.46642808422465	5.53165011547188	5.12490673085862	5.53470586391003	5.65892931569215	5.41630473662625	5.43142900165325	5.60654795752253	5.19872032331034	5.46750381801421	5.79400008629617	5.84312151165796	5.08244173601626	5.48630850390315	5.57189159980702	5.73713046740267	5.38284246472066	5.30095746068576	5.6747325928188	5.72627487988483	5.73724934092985	5.1657769018803	5.07222722282825	5.53053523630399	5.45386670170806
5.43x44	5.47x47	5.38158963504279	5.25467049395107	5.40102434728821	5.59621657908269	5.38289457448314	5.40095602648272	5.4661576998839	5.24249339532249	5.31428885176559	5.64486634031312	5.25446857446117	5.32673727529338	5.47427365044898	5.43282440356763	5.66476901559101	5.2720864939794	5.60290942279099	4.85496426351419	5.11973934883408	4.66652847414435	5.18464598598593	5.25677324981781	5.48576430408745	5.53789933097379	5.40667078709256	5.22143505178414	5.12426053201826	5.24681674922995	5.12283847100414	5.18759260158313	5.19500230991287	5.29847836647466	5.18026234856885	5.48439704981324	5.02408528988113	5.57825617912982	5.05094456512839	5.1217478461947	5.40327428509788	5.58844218007129	5.61136970801246	5.14492701600324	5.36303673304593	5.18224873968821	5.09528664551858	5.28202962884533	5.23560063412021
5.43x44	6.48x48	11.2274381761825	11.7537312373561	10.9002583455623	11.3280117408131	10.1058860571451	9.80887440025613	11.4954464898063	11.0833078546073	11.5138576072488	10.9522975671774	11.0191162077546	10.7085969669234	10.1496768914089	10.7963796709823	11.397158856487	10.9404728417011	16.4021883296102	9.90152816488444	10.8072323006402	10.4276095534883	10.0596029245691	10.0799516367887	10.800799831494	10.7319862094582	10.1578223059867	11.4936620360962	11.1857851311385	10.5569156954103	11.827399545124	10.9389290609273	12.1128134221575	9.98765062464642	10.5535598733318	9.64428623590156	10.2051584995041	10.1806680036233	12.2771057664256	9.64309841285466	10.765025034806	10.8933989645106	13.246432349882	10.3853442889487	10.3240730334495	10.8356804124153	12.1939462849399	10.3023635152328	10.5632456186534
5.43x44	6.51x51	10.3218600068011	11.4779751263017	10.2173308158247	10.4723018482089	9.32890406210719	9.62159893157057	10.5046103211876	10.1640561293216	10.711359810967	10.0021074779268	10.2034055589298	9.68832400366544	9.03187981540941	11.8046848327264	10.5325840134318	9.87141474156567	14.6545158227763	9.75298856761352	10.5352463663647	10.3518463087509	9.37211534286684	9.63102746336028	9.63407473502256	10.1405539296431	9.29083478488344	9.168957083551	11.4489249276952	9.51843905270187	11.3977171398487	10.2422994000371	11.6630597186159	9.47013141408291	9.96229210573551	9.6592311288218	9.66282546670486	10.3230502275248	12.2365876370825	9.53171652956591	9.8249857506258	10.0712942564499	12.77948926992	9.32586601876737	9.32173556801522	9.57094243008493	12.4093482907041	9.92126030300586	9.52477291067876
5.43x44	6.52x52	6.91291552096509	8.84446092195562	6.73557191335673	7.14526458572389	5.99081238230676	6.26350429073055	7.11495010523616	6.46822247607486	7.02922001362883	6.61072900669813	6.44014549525087	6.51383980460066	5.31463808739598	8.62648978437928	6.83300709790353	6.68378044223477	10.9921330505048	6.3378897118836	6.96469984995764	6.94763938327257	5.75117935731446	6.32983870252631	6.26545880203517	6.55499969488939	5.83990796160351	5.65760063984725	7.83221456549806	6.34261688895049	7.92233235859239	6.88528089477837	8.56312822512895	6.0618134250404	6.94680876374181	6.2300821824435	5.87300987569406	7.21734279357715	8.65366806620175	6.14938452204772	6.38764095734881	6.5375779918866	9.17661081227705	5.85744679873407	5.81762649196388	6.42837670022534	8.717565829978	6.21613151405277	6.52166428145454
5.43x44	6.55x55	7.62617446692639	9.46429870619054	9.40545235488437	7.9699110409088	7.40643915792198	9.0685745296601	8.49575393946882	8.73828020837053	9.15775441907021	7.8314227315348	8.63556633927388	7.27798715305269	6.63096471111105	10.7680931459567	8.63173122843848	7.44726110727964	10.5180679784835	9.11611501682597	8.65479335397443	9.14009392730731	8.17171915816984	8.84723205302088	7.77147508520744	8.18473903065944	6.4638816511443	6.45340166113965	10.1087315227975	7.39611093751304	8.4255220016329	8.78184843868306	9.86998890576884	8.27537993085514	8.62422112425232	8.6518504957032	8.87019142972687	9.68056207045851	10.0453483762386	9.14171214817006	7.62076131367464	8.43351207979215	10.3925855300786	7.24900358670073	6.83458630789019	7.25698615128898	11.4354437605193	8.33131544235363	7.37147081660099
5.43x44	6.58x58	12.1636519598351	13.0456097596088	13.359154351979	12.3689306328397	11.242715374855	13.2184429869785	12.8294452724972	12.6975855185149	13.2168449336443	12.3993961949766	12.7228234680829	11.8149554802377	11.0611007589661	14.3772783237997	11.7211153906102	11.6964232994536	11.556059752355	13.3725291923406	12.3803169991725	13.6195044696935	12.6171764273945	12.7599219825201	11.3771014762109	12.1176437891201	10.8883461094879	11.0397754506149	13.1546177823607	11.6021123076791	11.6419751760601	12.7684757508483	13.4282834346018	12.6329703949625	13.1227614852972	12.768307640404	12.8293959717518	14.4316704854289	13.3514656124337	13.4799574183304	11.188347018215	12.2604924452487	14.2243433943363	11.6580983869583	10.7436625040067	11.6065777040435	14.5961073577855	12.2885978451571	11.5181520219174
5.43x44	6.59x59	11.1359028821196	11.3420231440427	20.0894830446181	10.7092769597205	10.1771152101173	13.1501131173842	9.70853778897729	11.3546662214263	11.6507225956161	12.625316510884	11.6959097978738	10.854077482679	11.1778168261964	12.8464798680417	10.1059675439811	11.474708318733	8.36186731537878	12.0357394870444	11.2994496768648	12.2672989692108	11.4246906741496	11.5188458623249	9.68840059039674	10.5601706899084	9.85313604899476	9.84422526154293	10.880133914617	11.236856277447	10.6494243036889	11.2589662935813	12.4224595390768	11.4514527899302	12.6098582069744	11.8990459281406	11.7152891983083	13.4355633674216	10.9976922124599	12.1577317785844	9.18549688367483	11.0713732662213	11.902387407575	10.1379644899753	8.91530924870248	10.4560263006555	14.1553015156866	10.8891824302837	10.5521867401975
5.43x44	7.32x31	18.4279748751728	17.6120705483484	19.9058439157952	19.4627937871211	15.6925486139123	19.9568216407323	18.9615291050063	20.1745418039667	21.5488783002735	18.998963287506	20.2758588227478	18.5442469245855	15.9098812691987	19.862792024285	20.9814312428871	18.6585499168612	20.2984449158057	20.7283752378232	18.2988884908346	21.8624751114781	17.9390415853244	18.0615460578545	19.0317727497992	20.3103889918436	16.5712283189871	23.6160937921579	21.7074782966608	18.7236675093316	18.5496401312802	17.505616755773	17.5481604164083	17.5975739521106	19.4847790082413	19.5741648353129	17.6332548611991	22.1169092325307	22.8167430848489	18.6089030305389	18.5037883148289	19.6353666887074	20.8767210787518	20.7585945815221	20.1290940928796	18.0796320205916	20.8896001637178	20.7311597601292	18.4364369117246
5.43x44	7.35x34	15.0111458923028	14.6330022210071	16.304771080883	16.0890433214657	16.3285915191727	16.5916951816263	15.4591764657759	16.1890270862705	17.4097394868505	15.1107947176844	16.1911492180141	14.7691473010462	15.200583179602	16.7710900659438	17.0858798719879	14.8483256968589	18.2805628195633	16.4448898141642	15.5524133497024	17.3522427657061	14.3055488535044	15.2976998924675	15.0757866129765	16.1449610714922	14.0297379162977	14.7772361759566	17.620975001401	14.7108288345695	16.3404202210347	14.2648013305479	15.4927805444988	15.666906554901	15.459245162685	15.0837427053103	14.1431401393043	17.8932779557017	17.3677892663401	14.5865413995231	14.7360502510001	15.6319946583921	17.4138856663296	16.2135555014932	15.7951827149926	14.335694123411	17.5124496573152	16.1992506925475	14.2744676608271
5.43x44	7.36x35	16.509326031065	16.7517583853159	18.399347080807	18.0381658158472	17.7110706903902	19.3090953956937	17.0740464448238	18.6512430953006	19.1147928317311	17.34302721557	18.1955714392266	17.074224140499	17.7816701409063	18.8656708865601	19.2461213235291	16.9579811003551	21.5410101202335	18.4852088438297	17.7060823447763	19.5214852150137	16.731609277054	17.4639738318631	17.334918084606	18.8644937912471	16.7570830993941	17.6579021687175	20.1284759979488	16.9895420479776	18.4856459989907	17.1533977100748	18.0273693311032	17.8752696483158	17.1001433034931	17.7744246039077	17.104324277796	19.9054665356027	19.9965212224527	17.379349959075	16.5921766203232	16.922393920483	20.4488938087125	18.6451401979175	18.0254929197512	16.8601834806149	20.3159310148464	18.8431652330494	16.5857283530148
5.43x44	7.39x38	13.6825657681591	13.8225005335504	14.5601258579725	14.166924472164	14.06676796567	15.4391228377781	13.9173058096745	15.691818090967	15.5728526930682	13.689631879638	14.9376575472863	13.6918529790529	14.6295080915252	15.2929208786288	15.567474136802	13.3553679844473	19.1371461561018	15.0366346633813	15.1472712063923	15.923233182994	13.3144231944159	13.6508224660641	14.0578060165874	15.7032659978745	13.2648727849158	14.8603222037747	16.3112035423509	13.5219421681946	15.6464956140345	13.8231305788523	14.5206501920541	14.3666856651073	13.3555324865765	14.2224316134759	14.1048080809347	15.5086841801618	16.3160448638756	14.5874048754396	13.2418175867212	13.2104971140378	17.5315383523523	14.9414927299785	15.017659804377	13.6147882098841	16.8182644169962	15.4399228948852	12.6845973132772
5.43x44	7.40x39	17.143302073988	17.3613226742665	17.9689454615456	17.5888066963055	17.2887531360709	18.4596710154867	17.3659239892382	18.7971235033449	18.858484589171	17.0092879627573	18.2254030682452	16.9516715694943	17.8885004681779	18.4359407950883	18.9152085634814	16.6601440570002	22.7638458525795	18.1119303775164	18.0952749081079	18.8927835429298	16.7424729654851	17.100674548099	17.4063524898239	18.8282654272772	16.7713234719267	18.2114364891955	19.4069986602772	16.7184106002933	18.9461019209757	17.2362155068913	17.7876122062519	17.6720834368786	16.6333009652324	17.4948951983143	17.5601555801764	18.3560811721892	19.6862525890531	17.3570837700346	16.9016484994808	16.8811079316495	20.8113731887158	18.1919255990123	18.3224937713184	16.9967769297594	20.1060592110936	18.4246864288107	16.0619201218285
5.43x44	7.42x41	14.122726117857	14.8722476109027	14.275769331283	14.3799488872527	13.5753068105292	14.4327366081419	14.3510567206739	15.0528138897682	15.011601680034	13.6215689992012	14.4796113898129	13.7556070749349	14.2649574131856	14.0491606510852	15.4501649182137	13.4402485840106	19.373542241934	14.7628591065552	14.6228759483215	14.5219740049347	13.3983581830014	13.402312263188	13.6502814989289	14.9737515005425	16.0296561722328	14.9318294257603	14.9907099565031	13.3148713099301	15.7069697905102	14.0134201749609	14.6384037722697	13.734155889606	13.3228617421333	13.8341305834519	13.8102220836596	13.588915666822	16.628736001272	13.1297836615841	13.9147971239253	13.9729854004075	19.6581798496198	14.3882709524112	14.2903323264366	13.5541632718512	16.08339908104	14.6309538650083	13.321694261617
5.43x44	7.43x42	16.3387692620956	16.4650787425994	16.8895643519897	17.2578792150137	16.3661029570268	17.9445866489033	16.7022037767475	18.3890249061771	17.6393130251719	16.2060895653455	17.4170861512481	16.8118689323942	17.183590486275	16.3813280902374	18.0921127013956	16.4291419739437	21.5112860145552	16.6916658545515	18.0694673690178	17.5401072687712	15.9798433659407	15.5702620722967	16.240987316047	18.2652895131722	18.6067689564846	18.3060526875676	17.9164024569666	16.4110273292076	19.3322202553147	16.6788566154878	16.5435181868912	16.7809329895569	15.5245181567738	16.8164070776132	16.428621244645	15.9107280474528	18.9156214013709	16.4962720030921	16.450906388403	16.3825102166915	19.7002084506738	17.3451222538211	17.3028637514141	16.5939128598411	18.9906681030447	18.1893591420918	16.4033021370698
5.46x461	5.47x47	3.83204136198972	3.70861443129371	3.78444434494683	3.86555118967528	3.85154657248228	3.80413801011478	3.8466164352584	3.79957155479404	3.80785201918352	3.83113364423639	3.78625857542773	3.80445922569818	3.85056580258018	3.80792069245146	3.81441201235525	3.81217378932283	3.79860369083167	3.79097625948778	3.78580467008006	3.84552545174258	3.8074266900362	3.84436392658136	3.78937435469234	3.76535390102976	3.78401453485581	3.80760042546484	3.87177078350462	3.82240565612809	3.86640362611045	3.81967132093849	3.80458276293209	3.80516504241275	3.82283258853955	3.80658981241741	3.85371677734626	3.8116918815665	3.78272824823565	3.81501284401508	3.8649305297767	3.81496212300987	3.82337154877734	3.86568622627342	3.82157415210015	3.81081579192697	3.79221663410729	3.78158815843291	3.82142722029349
5.46x461	6.51x51	13.2894745569567	12.5359542915567	12.2663674329444	13.4239398836556	14.4536210687841	11.7517711856554	13.184875956944	11.7428641310372	12.2145353575157	11.9670484665184	11.9633268366287	12.7341212496191	13.6250835593768	13.6532494667021	12.4715253678129	12.7882149653499	12.5700057279223	14.4713527011126	15.5777009215096	14.8718429927161	10.1902842943659	11.851507709992	12.2258882703876	11.3138510242976	10.985846621904	13.1189074621327	13.6026050813806	12.857463863453	15.9022598708485	13.2237252315677	14.2463402668896	10.809723076934	13.3499224342316	11.9606139056488	10.3462367071317	12.2864444409276	14.2289583947666	11.7108048399758	12.0524813212882	12.4394564993813	14.5362844633696	12.4751058111745	12.8386662858725	12.6008479079783	14.5414222825692	11.8411370231072	12.9405365035612
5.46x461	6.52x52	10.3775647914142	10.740867283418	9.66483119355946	10.6785511189487	11.0895703253102	9.80155283615816	10.4293378984478	8.88879086265393	9.17010496123136	9.41131250145271	8.87159827764986	10.0410404341383	10.0149730404031	11.3218203924987	9.42902905924041	10.0902056470619	8.96683695625163	11.5819387409881	12.0719566765293	11.9971965475273	7.71526499868929	9.49419807040068	9.59838496831629	8.56787348179232	8.54834416714723	9.85191250468659	10.781917176458	10.2787302717797	12.5211487092838	10.6715030337811	11.6748423543961	8.69847204973379	11.2498807549236	9.89160578470451	7.54008229398062	10.3624175750642	11.2988078574689	9.72537865586734	9.24473579936171	9.64168221836833	11.5149157183194	9.88221812145431	9.81575417377595	10.0231510015563	11.3701371583636	8.94413165153555	10.3559648995156
5.46x461	6.55x55	12.5481481103787	12.8414985496242	13.2240821609668	13.076005276842	13.0817991881851	13.2740519058801	13.0020301876284	12.5323854872087	13.0492389433254	12.0735021017102	12.5533331828642	12.1824208185401	12.0811857033985	14.324257362949	12.3397216743329	12.1822264385456	9.84393955690505	14.6645175167818	14.2005025967393	14.5288485779156	11.5769172926129	13.1382826122747	12.4777334880979	11.7569787785808	10.7166272212856	11.8914875436171	14.0065255506139	12.5624804079449	13.8402996354848	13.6717881054381	14.2265881363031	11.9555518065876	14.0522364412217	13.0170856185246	12.1133877177279	13.9922679005228	13.9177219400303	13.4725420392738	11.9718016188041	12.8343860780327	14.3235693177364	12.2933109047156	12.1427672299192	12.1274846114106	15.0853381466906	12.3566764544517	12.5799512717657
5.46x461	6.58x58	17.3881008451182	17.0906574186015	17.8439853732287	17.8497673094077	16.5382161674106	17.8746610876962	17.7958565964103	17.3828461708663	17.9048227302032	17.201488336769	17.3810895803456	16.9545758130364	16.2598241995416	18.4655614861829	16.2565791296939	16.698185799661	12.8154071726184	18.8686080567698	17.601383610387	19.0574386001897	16.5999410541122	17.5242969045837	16.6766695116261	16.558287290659	15.6355902990581	16.5571648237251	17.8960455408451	16.9416092210864	16.9513625116095	18.1129518577177	18.3352512118051	17.044390895541	18.7314473012632	17.6632222711486	16.7305555496523	19.5651475844165	18.1046713861368	18.4309937333829	16.2733187150009	17.3016832996099	19.0123278690433	16.9764748402017	16.3545392475606	16.706414127514	18.9063600145559	17.0253763835047	16.9426857965318
5.46x461	6.59x59	16.4015291055438	15.9657755840423	25.0014860758316	16.3983293356366	14.6991253141131	18.2030769102369	10.6557568478264	16.2767191411537	16.7592949135696	17.7810383836265	16.6084655522417	16.0115368406659	15.6896779444321	17.3973393942867	14.7788517483599	16.4918318570133	10.1801114433979	17.1718457947886	15.9618351388554	17.4033591585073	15.9153275492526	16.5147687540577	15.0071147793305	15.1897953244934	14.7655671411565	15.0496646474265	15.7787118929271	16.5475922719893	15.454910772955	16.7402982649653	17.5944490678168	16.1199420904667	18.356303903564	17.0961011052228	16.10928505552	18.8470243274635	16.0426216685428	17.429627764241	14.4186548609778	16.3043339637043	17.1547932077306	15.4483123997413	14.3460424159418	15.5581762748723	18.7792898161778	15.6829139511763	15.906246100196
5.46x461	7.32x31	22.3483268724976	20.2426595090665	22.8568011978929	23.2936981606614	21.3764668034734	22.9588069812	22.500904292939	22.959461883938	24.0841514070976	22.1446577078988	23.2798229589488	22.3831507612311	21.3602222132636	22.8632544927445	23.8700744447938	22.3939104669104	20.2569621118271	25.6219579462616	23.8988005138333	26.7389902202757	20.378839736354	21.7110160287353	22.9958064437845	22.5486643506883	19.5801046217838	28.3167821088485	24.480229512813	22.7413854019495	23.817843227295	21.4772947551595	21.2177039521245	20.4840108133149	23.4473320870414	23.2580414050711	20.0987797390787	24.7105342920787	25.8709408603553	21.5734090491049	21.7264168467789	22.9133034501793	24.4835553994921	24.6856039221243	24.3970895190389	21.8222244741456	24.2015006559511	23.3755059196587	22.8002492530235
5.46x461	7.35x34	18.5724646991184	16.3887501964	18.8290735566039	19.5809849854393	21.8745684300285	18.9609076523251	18.7256868765875	18.3911507252809	19.5555173288768	17.674627181358	18.7283025659028	18.2284285115311	20.3436859983632	18.9754638678479	19.5081250764906	18.2474763460595	17.2706431553663	21.1904144839123	20.9855416179807	22.0398773816916	16.0979191823043	18.0912752729044	18.5967341756557	17.7870033732498	16.4880365416868	19.6070229764745	20.0309262142318	18.4049317847147	21.3487130759678	17.5670915350265	18.4576025528778	17.3341898281979	19.2460482177511	18.019678160278	15.7285285707214	20.1416569576587	20.1253660836269	16.9720636930221	17.5247911257167	18.6312011690068	20.1871809324631	19.7930431717813	19.7213357306243	17.7116551739243	20.2862811771897	18.4701886021773	18.2054664592809
5.46x461	7.36x35	19.2846345570768	17.7354323883011	20.0426205372451	20.6671344893287	22.9313732689519	20.8952803044132	19.4477714918702	19.9171712850997	20.3462488926092	19.0135057787879	19.7633476415308	19.7510517694628	22.5653140018037	20.2509777294826	20.7662975274843	19.5915782416833	19.940889273049	22.6313159361094	23.0167279603335	23.6520291941305	17.6758843908869	19.4546673320312	20.0508966632418	19.6013153895344	18.4034718735352	22.0407131009865	21.6673493764235	19.8667473432366	23.1532891183953	19.7300329700688	20.3850406425889	18.4938287274431	19.9627802672874	19.8179420475487	17.875608325313	21.2656472509068	21.9900349476757	18.8280546260096	18.4487603377571	19.0379422732605	22.6518456201697	21.4011322364028	21.1409525092887	19.457391911559	22.4549012467212	20.2302314371339	19.7500570885251
5.46x461	7.39x38	15.5105219125599	13.6851927279085	15.3333781666011	15.7930369783649	18.7536928096842	16.0000576248962	15.4425509874502	15.9603350215464	15.8937500294927	14.3547909772313	15.4613698293521	15.5439219632627	18.7636423436389	15.8796487366692	16.1416882636235	15.1639488590538	16.5462208676181	18.5289929839697	19.9309482714697	19.3785749992098	13.2394078795088	14.7155474583856	15.7331823227216	15.274602253414	13.9157331463348	18.3788810595205	17.0963306589455	15.5272710094208	19.7306399288011	15.1940797352127	15.8671356898465	14.0235468052843	15.368564311607	15.159217855813	13.6507834573698	16.2427425639884	17.4832946551844	14.7510052199842	13.9100684398029	14.2056729513248	18.6196114621117	16.6818434532878	17.0928150987484	15.2616568235562	18.1320823680018	15.7922065272716	15.0286431523275
5.46x461	7.40x39	18.291265948534	16.6357893711119	18.1211571926298	18.5132200602704	21.587170402811	18.514724140532	18.1857437021421	18.5311404128294	18.4407124591215	16.8674338297205	17.9977481091385	18.1499148482851	21.6153935888292	18.3011218235386	18.7851815003209	17.7973925337393	19.9104843235919	21.1636396444468	22.4482829187446	21.8587913664045	15.9391182629404	17.5054999642969	18.3956191252157	17.807485785478	16.7615897217418	21.3999307942806	19.5226052052486	18.1051277266967	22.5979649747494	17.9440583202351	18.3994809981151	16.8039971732918	17.8045057780327	17.6285208398209	16.4328011610924	18.2254334653528	20.1908559749209	17.1137514589876	16.9317295336301	17.3248005760528	21.2109918202804	19.2644044029396	19.9043365124286	18.1100268635913	20.9385162320543	18.1724613082543	17.705443795624
5.46x461	7.42x41	14.4866012922286	13.4670371648704	13.6172706883575	14.3912657539217	17.1485673454082	13.5205206260706	14.4000039236106	13.6580966829204	13.7775866536923	12.6163419817315	13.288661181624	13.9973286737149	17.1454419890535	13.3352584526885	14.4487445475377	13.7236480208434	15.9378077852633	16.825373220229	18.2382152909763	16.7456432841501	11.5064477576705	13.015030580064	13.7520145796898	12.9979374132975	17.4082039854777	17.1720019508501	14.5300047487948	13.761454174614	18.4698255812014	13.9560327099072	14.6603244848127	12.1749083774787	13.7720636071723	12.9875593550135	11.685409278241	12.9284598464009	16.3749934045788	11.9708337637777	13.0967361582953	13.355580519019	19.6623285752222	14.6280034522829	14.8545565399981	13.8481977527764	16.1484070112194	13.3251048401129	13.84176311024
5.46x461	7.43x42	16.107731466597	14.2464160756311	15.50300961104	16.7033338289097	19.5979300182443	16.4027560489084	16.0696598906137	16.6210142891461	15.754443722328	14.6285325989998	15.5776928330225	16.5238705816767	19.8661653320413	14.9471045022105	16.4471179542192	16.0250976596088	17.7172567854056	18.4606116366712	21.4298856039877	19.2265683105436	13.8767347023715	14.5127234521988	15.6869139412441	15.7058747607384	19.1587803891584	20.3442295995695	16.6956822562003	16.283381067825	21.8520664697872	15.9052169428776	15.9006773126179	14.4719504559683	15.056410495201	15.4276229536504	14.0264576426124	14.5526201764493	17.9529068676914	14.5591253171336	14.9814468593658	15.272723431006	18.8945735331603	16.9985277597797	17.3722921918784	16.2843145081394	18.5785783632656	16.360222309003	16.3386359589777
5.47x47	6.48x48	9.03292483086182	9.87413743068224	8.77765481207822	9.06082325178016	10.1224027286015	7.5208873811539	9.03978108142006	8.82274367756425	8.87336289126056	7.99279613151743	8.50469576175421	8.39856374626043	9.35399278383301	9.54683135914739	9.21856832702345	8.46262382479571	11.3229410490385	9.46609644996289	11.1259335338658	9.75919714935609	8.2020363934818	7.86268948897257	8.73280739510497	7.85052845355012	7.95866389540355	9.2880117893982	8.88557589579876	8.4132305923468	11.1806451513318	8.91765159669293	9.69816075346248	7.76687414601267	9.01142252921258	7.74276475168915	8.52141918931348	7.84573240685661	10.2068614666801	7.53266287576976	8.16396625421737	7.99725759245005	10.2198839523744	8.62568687120046	8.56555538187688	8.58392369490782	10.5121198623303	7.7474389962103	8.51685117869275
5.47x47	6.51x51	10.8559379603975	11.9942828464231	10.8627015516399	11.0054151216572	12.0423888410896	10.2169329057208	10.8550426070099	10.6746954054905	10.7750906724723	9.96601394741147	10.4776308867988	10.411439381757	11.1723328360732	12.8181648062427	11.1973683515369	10.4315558283508	10.9475044644887	11.9794038248988	13.0373986285608	12.2175106302389	10.0718392560644	10.3532642678529	10.3341313132745	10.3515086340108	10.1690478413665	10.0590115816615	11.5632223017635	10.488212621796	12.9934211815057	11.0224818439406	11.7663240223954	10.1701142569786	11.0508713683582	10.5570634648088	10.4423310137153	10.7480895976913	12.34797384189	10.5203736150386	10.1455853453608	10.1577717044635	12.0205493218904	10.4044273749207	10.7231645049398	10.3567651803061	12.877909651803	10.4153360483472	10.5371032546901
5.47x47	6.52x52	7.90393003511544	9.44543969331232	8.07919680413839	8.09849702105274	9.07263385131352	8.26357392415654	8.02267305827677	7.56929395650611	7.46676328806532	7.26248759035084	7.19419279697174	7.62093701587935	8.06261806115111	10.146410843249	7.99993987477406	7.65920420148203	7.16675247235455	9.31141611141935	9.9168177859634	9.4911496142459	7.21260022460693	7.74466377578781	7.54670378377209	7.23480932713503	7.4338153057498	7.14566784842397	8.5081293478649	7.82054403478428	9.89211777123584	8.31016871068211	8.97181129984353	7.56996836188897	8.7538500101384	8.42623397491429	7.36506524071579	8.58324746235363	9.18655376079626	8.26372319236312	7.08740883539252	7.44564221541701	8.83944670214147	7.63333668849999	7.5843966800267	7.62968262773754	10.0161487608761	7.27819057183858	7.73163701941575
5.47x47	6.55x55	11.2854838620238	12.4467952501839	12.7393391508351	11.5212566154912	12.2497282010663	12.7752422286233	11.7500016595744	12.1129543052056	12.0943799344985	11.0243569426974	11.8094625618611	10.925347088308	11.5281187103534	14.1044353662243	12.1480589396002	10.8856019585506	9.12146161533337	13.3361239871261	13.0976505908503	13.029115894795	11.5196163130549	12.2960726250295	11.5045696573144	11.4726588025619	10.701678419762	10.4845198745579	12.7738333713886	11.2797243317379	12.4326034683006	12.2063111954431	12.4234075035797	11.8273152490326	12.4480347846558	12.5018113087664	12.2090421000175	13.0228682708534	12.5785506716792	12.886327715839	10.9897959034734	11.6630850978633	12.2989877632267	11.1380727686616	11.1033701640538	10.8939668624427	14.2641877441374	11.7581121784069	11.1791115926088
5.47x47	6.58x58	16.3168015860952	16.7913142427864	17.3013378962437	16.666719683249	16.5131586621094	17.4095006533789	16.7744468165123	16.6585083665975	16.7492639838293	16.2091086121353	16.4604890875089	15.9300617387379	16.311870340338	18.3507332006108	16.2748368348196	15.7286283572345	12.4117126537799	17.9039445095208	17.1514906057753	17.8264738521111	16.3159367797255	16.638689311361	15.8228945518827	16.1680234413487	15.5204757014726	15.527857482602	16.8439775290755	15.9299429377509	16.3344906868871	16.7671587933078	16.7532315987095	16.8201233051366	17.4270321913974	17.2902833695692	16.3356928839887	18.2966323404063	16.8834043071888	17.6735775948165	15.4495763695967	16.3881548991947	17.1457478402081	16.1040109910544	15.5967623242774	15.7482887324306	18.0925248099871	16.3596355093871	15.7276319260084
5.47x47	6.59x59	15.8513692153076	15.418705944404	23.5122476381991	15.6692306448019	15.5343609459804	18.0383425236356	7.48561193223373	16.0706171007837	16.0677491578628	17.3595565899593	16.2537678708661	15.4861800971059	16.6455268766116	17.471903903124	15.3563197413964	15.9371358468202	10.467463541852	16.8367618323714	16.3181957335975	16.826085700483	15.8825505823215	16.0540347888	14.8221916732985	15.4400766189809	14.9838648218676	14.9046629951838	15.2949441319673	16.0243079413746	15.6913245457482	15.9250367974457	16.5155216084749	16.340478144779	17.2418247874174	17.0624768717792	16.0255011154098	17.5808237861597	15.2590432531008	16.9122666428838	14.1509748074117	15.9908677062879	15.8465564713599	15.1187650950731	14.1242472365787	15.0311044171744	18.398265162781	15.6888111404274	15.2700743613121
5.47x47	7.32x31	21.1980896544948	20.7212767222486	22.395663553465	22.080273684898	20.2791739969852	22.0780087870261	21.5954412318897	22.4687857704861	23.1272633486974	21.266704258065	22.282151489477	21.248388644789	20.2373013517119	22.9227677648228	23.2597190223786	21.2452053179064	19.2857599279883	23.798205436545	22.3059026044677	24.4064042005372	20.5762824873688	20.8719161314911	22.0027813241872	22.0626133084909	19.8024528026202	25.3560816767891	23.2541374813172	21.5132099650424	22.1298569584171	20.3714433705616	19.955103883468	20.595974024066	22.3077847174479	22.6082123574598	20.3750810059739	23.8340534110335	24.9090985786319	21.0590848091744	20.9189686409249	21.7636216425484	22.5029220547021	23.0227400845338	22.8434778000199	20.8148163095426	23.0447088287095	22.4724005393282	21.3912044074194
5.47x47	7.35x34	16.9126411302316	16.6973439205162	18.1113001189865	17.9906456526718	19.937283942403	18.0193279841397	17.3079866246771	17.7971022641328	18.4646950963183	16.5544793031977	17.5573442467817	16.8007029019622	18.3361539315092	18.992911967363	18.6198172654836	16.7513942106321	16.1942770446846	19.1074998102839	18.7878687987755	19.5746786691378	16.3050398956887	17.1137477193045	17.4253802254068	17.2287686443344	16.2847591630948	17.0135281761309	18.553833727831	16.8587597112006	19.0010344192099	16.1597300101208	16.7357966646348	17.5643681924514	17.7866214048649	17.2486420624929	16.1975534572354	19.1353634404994	18.8374390244534	16.3880913165628	16.2988674453166	17.0710093726177	18.1018715606978	18.0805835082831	17.9985673318739	16.3781895214337	19.0485284208518	17.4269261202313	16.5761868051733
5.47x47	7.36x35	17.9679595113079	18.6425131621249	19.6144456205114	19.3670833632739	20.6391593578808	19.8922916980422	18.2888074515535	19.5590688939939	19.7424437443798	18.2149032662817	19.0406542954805	18.4022717075909	20.1454706820168	20.6356670597294	20.2314692990895	18.2368320439708	19.08830031721	20.4752965302093	20.6877719196631	21.1417184968488	18.3883560167841	18.8852389712177	19.1184137678836	19.2784830575437	18.5589756991058	19.1492663305935	20.3146205969986	18.3915890830564	20.7366454857096	18.6500636996231	19.0241009774444	18.9727805553113	18.8527730851459	19.3856101528944	18.7869624473995	20.5032804692322	20.9178612673476	18.3798798146234	17.6906991947746	17.7981681641679	20.7946141103893	19.8557600962542	19.5426362602388	18.1895357005065	21.2575304539356	19.3348422543345	18.2902575432934
5.47x47	7.39x38	13.9061104914351	14.4751630388055	14.9471221644837	14.4611121633158	16.0857813301064	15.2834852700554	13.9885825229006	15.7973950384233	15.5323695874133	13.5470748503136	14.9750271118286	14.1062799490156	15.9383518282161	16.2636839615138	15.5979325232545	13.7579852449405	15.8154963564221	16.2627860466772	17.1523485855436	16.934676465761	14.3022180447649	14.2048503336008	14.8610294394433	15.251142973561	14.1453027185706	15.2600125819083	15.8324661692359	14.0241275664478	16.7583313310126	14.0572921289984	14.2799906512574	14.4886530774948	14.1595348087428	14.8476815025108	14.923209105283	15.6468307653659	16.5079550823232	14.5808194557096	13.0136987824369	12.66749130649	16.9224038777001	15.3780095916214	15.6402938911006	13.921516655882	17.0181899154992	15.2129512587137	13.5717744234127
5.47x47	7.40x39	16.6498487981123	17.6292826002648	17.6002310496198	17.0478976123157	18.5399085488575	17.4724287378716	16.6359703053354	18.114979906144	18.0796215944914	15.9683250530543	17.4905278651046	16.5000829997912	18.4302361623502	18.5871738572597	18.1731235344946	16.2261103164005	19.0859313107849	18.6168603690311	19.3590736606894	19.1906684094119	17.0637270547791	16.9055516029498	17.3949435469047	17.5126521692175	16.9201787815614	18.0182721424669	18.1327962818756	16.3267753399133	19.3550881682311	16.726959974843	16.7984247178121	17.0112275277242	16.6293647804118	17.2779703958538	17.6961865100931	17.5306943958304	19.2992267720756	16.5103804317163	16.0473944614071	15.8134895263506	19.4789854458593	17.8422860362679	18.1825788324979	16.5223940759201	19.652607486031	17.3067287203561	16.1158985477075
5.47x47	7.42x41	12.4105086922334	13.7521100562786	12.8296801986643	12.5835431417387	13.7674539766799	12.7562467834391	12.3973686320929	13.418041175969	13.3455028005692	11.3036336635615	12.731641292465	12.0079051461943	13.642002712212	13.3398366556716	13.5068008055202	11.7160588083195	14.9543984499544	14.1656179886371	14.9366486870382	14.0766023244247	12.6396266558787	12.0748920906151	12.5015405850639	12.7485636445837	18.0277959274006	13.6337976367555	13.0053587032423	11.7237205698532	14.9842141602421	12.3482893552103	12.5588845842296	12.0845567978309	12.1037097205774	12.4552564806992	12.9816295972424	12.1544588114815	15.1341901005637	11.3699742304018	11.8492203119024	11.504020992679	17.480704362239	13.079244358907	13.1933025812342	11.8712271480248	14.7917397894906	12.6290351967203	11.9042933431599
5.47x47	7.43x42	14.7664314578709	15.316495095158	15.4041049074589	15.5185317282274	16.2941579101223	16.0065043029389	14.7789643412521	16.8432791344204	16.0570154761089	14.104635089218	15.712969738404	15.0507763587132	16.437246058875	15.6870509975585	16.189565960828	14.5389818763213	17.4481546875307	16.057747071118	18.1545530377368	16.9750528423331	15.697037809727	14.4546813178292	15.1508455539617	15.9447679192894	20.1785102026884	16.9348504864968	15.8136235253025	14.7825982154694	18.4129296419663	15.0071577922004	14.5733793267039	15.0079286045743	14.220106961623	15.5589053599538	16.0140621017904	14.6165621470987	17.4027425999467	14.5189268542823	14.5337493441988	14.1788408905665	17.6995869160837	16.0807414630047	16.2700088813743	14.8507758046507	17.7505597939896	16.0611141269838	14.951737725094
6.48x48	6.51x51	5.41070106363307	5.54007048691621	5.40608185287644	5.42092298414209	5.42141107092978	5.17867676149033	5.50708507288566	5.54068678053543	5.72146012832389	5.29066385248581	5.56218689006401	5.74928317270945	5.38211965678951	5.3580080253766	5.39356783585782	5.93219529348116	5.68308103056784	5.8526522192934	5.2295018883255	5.97275522686138	5.41093162034044	5.54701099692437	5.1210406169059	5.70807901136626	5.48945288712819	6.11434158352312	5.42279678763643	5.86762720356363	5.31358937066085	5.67822384201257	5.69130995465894	5.32524647316911	5.23397458916262	5.11656398376882	5.60645556479314	5.24784098463359	5.29606391577745	5.84858435862902	5.47380169534849	5.50471370736027	5.50560096628879	5.37759732594399	5.82064171719923	5.86294712580627	5.37334095326176	5.76790135144491	5.81389172585799
6.48x48	6.52x52	6.34492088209144	6.43623966303307	6.4425728556222	6.32799920986089	6.12713864703583	6.57652529836235	6.45573272371154	6.37957122383628	6.26595507484693	6.31138098992606	6.13391375876772	6.49426885800088	6.26525554147634	5.93816655205965	6.08046659393833	6.71321867661109	6.51652568474951	6.76454122612908	6.22696314426222	6.83544453565385	6.53058366457394	6.41933773842753	6.32739353920712	5.9746106986146	6.37338818839713	7.16939676681379	5.89291591659002	6.64952629891784	5.95718272340206	6.65311370712992	6.27374290196849	6.23097014918223	6.55131971437817	6.41875011197663	6.41055044438463	6.34180526348768	5.90044989810099	6.73393859490863	6.09407983209935	6.4949054650549	6.47722208975421	6.48763708911034	6.27664384842728	6.68623130021688	6.41911239970138	6.0234864488932	6.3515620913284
6.48x48	6.55x55	11.0756842226564	10.9257932435133	10.7609786729647	10.7904262195708	10.4628612721378	11.1723439349136	10.7229550497985	11.0927247329049	11.1732582982763	10.4399054593421	10.8705004484614	10.9693668003217	10.9884800586796	10.292326559141	10.5328236480063	11.1053939146705	10.7263643421245	11.3426224921753	10.4516969913981	11.3181210454739	10.7178994677129	11.1207824365015	10.6194597791036	10.6922651014647	10.9703016366917	11.6803567582502	10.4923179517207	11.2697404584134	10.7668118308067	11.0300016772438	10.7619007614826	10.5374077457409	11.2386119249665	10.4687010655573	11.1536894344428	10.9764502003152	10.3224375997145	11.5934052805895	10.5312526795249	10.8179367256423	10.6818193206963	10.6220331857889	10.8700402023176	11.1450273216354	10.9613234602396	10.890431075031	11.0594252111039
6.48x48	6.58x58	15.8485229911181	15.7155414796946	15.4999064835889	15.7131736768865	15.2526375424056	15.7055260975238	15.5064125444927	15.9219318237455	15.9870729340927	15.280346854702	15.39427481241	15.635362291933	15.5485576501488	14.9621023255424	15.2492744089678	15.8268578688254	15.7011897956811	16.0413875023328	14.8987718621368	16.0396313236932	15.5867321142053	15.7762084798598	15.553967371703	15.5319648145365	15.7856443960961	15.9986643505013	15.4704343830417	15.7008696255972	15.332040242577	15.7910638653639	15.4922747522757	15.7250468361783	16.0662805589844	15.5039971942722	15.6019032492834	17.1013377839279	15.4350839323925	16.509596815186	15.6278125468666	16.0198589881434	15.8286880378634	15.4751695951935	15.823556363852	15.8093925879523	15.441691163859	15.6498946002841	15.4957495462465
6.48x48	6.59x59	17.4566672936159	16.5800976173242	21.6311934252366	16.8751693621131	16.6730139746838	17.8558249879416	2.10717963164036	17.1331853430703	17.1581296766285	18.0184440227229	16.9144736246801	17.1394245235947	17.8954614357943	16.2042460176338	16.4576901781508	17.8250453295356	16.3576292597674	17.0994979166056	16.6028340050727	17.2352174630899	16.8092203864427	17.0210870099415	16.4962149901121	16.4058455740629	17.1022694985198	17.5243042657904	15.9364062134472	17.6440419972295	17.2207506805017	16.9894109668346	17.4329097972771	16.8765276641849	17.7133479048993	16.9857360452823	16.8341938030902	18.0060620347704	16.1512523972601	17.4239892389774	16.2956204239053	17.4469014154376	16.7645011855408	16.5857216906591	16.4329912979956	17.07689520961	17.8252693948787	16.5984317331488	17.0487091886747
[truncated: 75 more rows]
[truncated: 2 more columns]
