# Supplementary material for: Improving the Modeling of Extracellular Ligand Binding Pockets in RosettaGPCR for Conformational Selection
Source: Int J Mol Sci. 2023 Apr 24;24(9):7788. doi: 10.3390/ijms24097788 (PMC10178219; doi:10.3390/ijms24097788)
Supplement: Supplementary file 1 [file ijms-24-07788-s001.zip › S2_all_calculated_volumes.ods]

## Sheet: Sheet1
PDB	Receptor	Volume		Average	2627.8850864721
./4IAR	5HT1B	2385.96085571933		Median	2570.79611328867
./6A94	5HT2A	2459.19214762333		STDEV	251.261894304206
./6BQH	5HT2C	2471.63357487433		Min	2097.27365573017
./5UEN	AA1R	2857.77026369917		Max	3449.486779129
./5NM4	AA2AR	2503.226815794
./6KUX	ADA2A	2600.042348092
./6KUW	ADA2C	2514.5126051715
./4BVN	ADRB1	2383.67127324883
./2RH1	ADRB2	2447.16753404133
./4ZUD	AGTR1	2990.76490576983
./5VBL	APJ	2615.804314715
./5X33	BLT1	2097.27365573017
./6C1R	C5AR1	2441.76548578183
./5U09	CB1	2994.97016984683
./6GPX	CCR2	2414.4324270245
./5UIW	CCR5	2508.90601442283
./6QZH	CCR7	2794.3736805455
./5LWE	CCR9	2137.98260725733
./5ZTY	CNR2	3449.486779129
./6LFL	CXCR2	3071.074125083
./3ODU	CXCR4	2893.42801323533
./6CM4	D2R	2466.25251594433
./3PBL	D3R	2522.58193487333
./5WIU	D4R	2442.59432019317
./4N6H	DOR	2712.18025153483
./6IGK	EDNRB	2410.68786766967
./3RZE	H1R	2763.63767367067
./4DJH	KOR	2734.42235145033
./4Z35	LPAR1	2835.12972156583
./6WJC	M1R	2703.3876650865
./5ZKC	M2R	2570.79611328867
./4U15	M3R	2614.25860519883
./5DSG	M4R	2564.330863322
./6OL9	M5R	2557.82086622717
./4DKL	MOR	2877.45140529167
./6ME2	MT1R	2757.32786134383
./6ME6	MT2R	2836.14322372383
./6HLP	NK1R	3110.29192405383
./5DHG	NOP	2669.79546237333
./5ZBQ	NPY1R	2458.232751328
./4BUO	NTS1	2428.368465644
./1U19	OPSD	2611.4888115405
./6TOS	OX1R	2413.77102494033
./5WQC	OX2R	2488.48301951083
./6D27	PD2R2	2522.37390679233
./5YWY	PE2R4	2830.9215324315
./3V2Y	S1P1	2574.42932838433
