# Supplementary material for: Improving the Modeling of Extracellular Ligand Binding Pockets in RosettaGPCR for Conformational Selection
Source: Int J Mol Sci. 2023 Apr 24;24(9):7788. doi: 10.3390/ijms24097788 (PMC10178219; doi:10.3390/ijms24097788)
Supplement: Supplementary file 1 [file ijms-24-07788-s001.zip › S4_List_of_benchmarked_parameters.ods]

## Sheet: Sheet1
To optimize and build the method RosettaGPCRPocketSize, an optimization of several parameters in a multidimensional, non-trivial task was necessary.
Different benchmarks with various receptors were conducted over time and with increasing complexity.
Some parameter were selected in a first benchmark (the four receptors 5HT2A, CB2, CysLT1 and MT1, not shown) and redone with the final benchmark set as the geometric benchmark.
Different geometric constraints and effect
This benchmark set focused on RMSD and the sum of distances as indicator for volume changes.
	RMSD										Sum of all distance differences
	5HT2A	CB2	CysLT1	GPR52	MT1	CCR5	D2	LPA1	P2Y1	PAR1	5HT2A	CB2	CysLT1	GPR52	MT1	CCR5	D2	LPA1	P2Y1	PAR1	Sum_distance_difference
without constraints	2.2502	2.7906	2.8234	4.8458	3.8312	2.4442	2.6526	2.9462	3.3168	2.1648	-536.7	-568.3	-473.74	-981.6	-741	-302.5	-630.7	-224.7	-448	-678	-5585.24
Triangles	2.278	2.7948	3.0438	4.761	3.6308	2.455	2.6218	2.7492	3.4086	1.9658	-538.6	-544.19	-50.5	-959.3	-544.7	-630.6	-392.3	-363.3	-516.2	-624.6	-5164.29
Tetrahedron without relax	2.2874	2.878	3.101	4.93	3.5304	2.5854	2.7714	2.7448	3.3468	2.041	-477.3	-566.2	-583	-1027.2	-597.9	-645.7	-406.9	-346.5	-518.8	-652.5	-5822
Tetrahedron with relax	2.0446	2.5776	2.8008	4.7246	3.3296	2.182	2.4338	2.6588	3.2242	1.789	-190.3	-681.8	-312.2	-1017	-624.6	-370.2	-252.4	-205.7	-388	-492.9	-4535.1
Tetrahedron with low STDEV of distances	2.09	2.5668	2.8278	4.636	3.3932	2.1556	2.4232	3.085	3.2378	1.7944	-190.1	-626.9	-330.5	-1020	-620.1	-362.2	-264.4	-281.2	-393.2	-501.4	-4590
Tetrahedron with bigger distances	2.1572	2.7302	2.8112	4.8028	3.5428	2.1026	2.435	2.8936	3.2208	1.7928	-190	-659.2	-322.7	-957.5	-629	-353.7	-264	-281.4	-387.4	-509.1	-4554
2xTetrahedrons with relax cst	2.0234	2.6934	2.9308	4.7378	3.4604	2.082	2.4712	2.828	3.1972	1.8192	-190.1	-688.2	-323.9	-925.7	-614.1	-359.8	-268.6	-244.1	-395.9	-494.6	-4505
4xTetrahedrons with relax cst	2.107	2.6686	2.819	4.8864	3.5694	2.1074	2.4226	3.1884	3.2064	1.8724	-192.9	-711.7	-324.4	-1013.4	-594.8	-359	-250.6	-290.5	-427.7	-511.4	-4676.4
Tetrahedral constraints in just relax	2.302	2.529	3.1482	4.7402	3.5866	2.4552	2.6602	2.5252	3.2466	2.1338	-533.8	-513.1	-570.4	-989.4	-650.5	-651.8	-340.6	-327.9	-531	-682.6	-5791.1
Geometric constraint benchmark (absolute volume of best pdb).
Receptor	Structurally determined	RosettaGPCR	RosettaGPCR	Linear Restraints	Linear Restraints	12 Triangles as Restraints	12 Triangles as Restraints	Cubic Restraints 1	Cubic Restraints 1	Cubic Restraints 2	Cubic Restraints 2	Cubic Restraints3	Cubic Restraints3	All possible restraints	All possible restraints	Final restraint set	Final restraint set
AA1R	2857.75	2359.39	-498.37	2316.69	-541.07	2514.05	-343.70	2244.80	-612.96	2333.66	-524.09	2359.39	-498.36	2640.19	-217.57	2936.59	78.84
AA2AR	2503.15	2284.32	-218.84	2194.84	-308.32	2575.52	72.36	2254.06	-249.10	2313.64	-189.51	2442.32	-60.84	2642.96	139.81	2664.96	161.81
ADRB1	2383.67	2151.73	-231.95	2566.46	182.79	2541.92	158.25	2272.52	-111.15	2582.45	198.78	2613.91	230.23	2644.89	261.22	2511.41	127.74
ADRB2	2447.17	2315.05	-132.12	2387.63	-59.53	2408.97	-38.20	2252.32	-194.84	2448.62	1.45	2640.41	193.24	2641.27	194.10	2535.08	87.91
CCR7	2794.59	2430.13	-364.46	2675.82	-118.77	2812.40	17.82	2496.83	-297.75	2543.13	-251.46	2564.79	-229.80	2643.35	-151.24	3011.14	216.56
CXCR2	3071.11	2461.70	-609.42	2786.45	-284.66	2746.56	-324.56	2648.48	-422.63	2641.74	-429.38	2655.43	-415.68	2653.42	-417.70	2741.58	-329.54
CXCR4	2893.43	2378.22	-515.21	2527.30	-366.13	2840.47	-52.97	2518.68	-374.75	2603.45	-289.98	2639.60	-253.83	2637.96	-255.48	2802.79	-90.64
D3R	2522.48	2321.52	-200.96	2205.53	-316.94	2677.87	155.39	2463.11	-59.37	2351.17	-171.30	2418.01	-104.46	2656.96	134.48	2346.76	-175.72
H1R	2763.58	2443.42	-320.17	2327.74	-435.84	2493.11	-270.48	2416.53	-347.05	2393.58	-370.00	2511.78	-251.80	2636.01	-127.57	2769.70	6.12
MOR	2877.39	2571.21	-306.18	2502.50	-374.88	2656.75	-220.63	2536.87	-340.52	2529.93	-347.45	2662.19	-215.19	2644.48	-232.91	2537.05	-340.33
NK1R	3110.22	2473.31	-636.91	2618.63	-491.59	2876.11	-234.11	2335.26	-774.96	2515.50	-594.72	2570.57	-539.65	2644.22	-466.00	2815.75	-294.47
S1P1R	2574.43	2329.16	-245.27	2131.78	-442.65	2201.68	-372.75	2242.83	-331.60	2317.40	-257.03	2343.08	-231.35	2725.84	151.41	2429.55	-144.88
Absolute Sum			4279.86		3923.17		2261.22		4116.68		3625.15		3224.43		2749.49		2054.56
Different investigated tetrahedrons.
	Tetrahedron1	Tetrahedron1	Tetrahedron2	Tetrahedron2	Low STDEV of distances	Low STDEV of distances	Biggest Tetrahedron similar to Tetrahedron1	Biggest Tetrahedron similar to Tetrahedron1	Final Tetrahedron2	Final Tetrahedron2
AA1R	2379.32	-478.68	2365.14	-492.86	2291.92	-566.08	2275.27	-582.73	2439.66	-418.34
AA2AR	2233.91	-269.09	2183.23	-319.77	2175.98	-327.02	2101.10	-401.90	2300.70	-202.30
ADRB1	2255.72	-128.28	2587.03	203.03	2620.65	236.65	2795.58	411.58	2283.77	-100.23
ADRB2	2366.25	-233.75	2456.72	-143.28	2357.31	-242.69	2335.21	-264.79	2422.16	-177.84
CCR7	2603.42	-190.58	2467.59	-326.41	2524.74	-269.26	2618.68	-175.32	2582.45	-211.55
CXCR2	2667.89	-403.11	2585.96	-485.04	2536.17	-534.83	2595.39	-475.61	2692.88	-378.12
CXCR4	2518.13	-374.87	2474.83	-418.17	2420.83	-472.17	2630.25	-262.75	2507.25	-385.75
D3R	2418.83	-104.17	2361.24	-161.76	2317.91	-205.09	2312.55	-210.45	2426.47	-96.53
H1R	2358.87	-405.13	2378.53	-385.47	2395.35	-368.65	2329.85	-434.15	2307.28	-456.72
MOR	2546.31	-330.69	2497.33	-379.67	2557.21	-319.79	2438.59	-438.41	2522.65	-354.35
NK1R	2541.07	-568.93	2396.12	-713.88	2563.36	-546.64	2951.15	-158.85	2598.60	-511.40
S1P1R	2122.04	176.04	1882.90	-63.10	1674.82	-271.18	1747.93	-198.07	2115.93	169.93
Absolute Sum		3663.32		4092.44		4360.05		4014.61		3463.06
Different tetrahedron combinations
	Tetrahedron_Kombo1	Tetrahedron_Kombo1	Tetrahedron_Kombo2	Tetrahedron_Kombo2	Tetrahedron_Kombo3	Tetrahedron_Kombo3	Final_Tetrahedron	Final_Tetrahedron
AA1R	2489.16	-368.84	2613.20	-244.80	2530.31	-327.69	2516.62	-341.38
AA2AR	2317.47	-185.53	2441.27	-61.73	2384.78	-118.22	2554.69	51.69
ADRB1	2298.41	-85.59	2218.22	-165.78	2617.71	233.71	2499.21	115.21
ADRB2	2290.48	-156.52	2304.98	-142.02	2594.96	147.96	2483.34	36.34
CCR7	2629.52	-164.48	2487.19	-306.81	2460.67	-333.33	2737.92	-56.08
CXCR2	2594.12	-476.88	2633.79	-437.21	2519.73	-551.27	2666.73	-404.27
CXCR4	2515.77	-377.23	2562.63	-330.37	2381.72	-511.28	2575.91	-317.09
D3R	2222.08	-300.92	2363.14	-159.86	2421.24	-101.76	2484.64	-38.36
H1R	2361.40	-402.60	2438.44	-325.56	2341.69	-422.31	2538.36	-225.64
MOR	2469.47	-407.53	2457.90	-419.10	2585.61	-291.39	2637.01	-239.99
NK1R	2681.97	-428.03	2664.33	-445.67	2590.50	-519.50	2660.14	-449.86
S1P1R	2066.42	120.42	2057.69	111.69	2085.69	139.69	2211.24	265.24
Absolute Sum		3474.57		3150.60		3698.11		2541.15
Different constraint functions (just difference to determined structure shown)
	Harmonic	Harmonic+Constant	Flat Harmonic	Flat Harmonic+Constant	Flat Harmonic+Slope adjusted	Sigmoid
AA1R	-377.1786715	-374.4151248	-500.5470459	-460.9030048	-438.3306098	-417.9093651
AA2AR	8.504337639	-27.09900112	-133.3020178	-213.8959762	-89.9445965	-101.0874601
ADRB1	-149.4303368	-20.43221021	-186.6103295	-56.43544607	-72.52684583	-34.17947006
ADRB2	-202.2532033	-163.2964528	-212.244307	-203.3172035	-231.0810802	-124.5295208
CCR7	-326.1864072	-301.1100006	-453.2091895	-436.9880679	-345.7253569	-315.6038328
CXCR2	-582.3296079	-550.9121505	-644.5502445	-642.963762	-567.4953808	-590.5422472
CXCR4	-382.6893011	-313.2753043	-475.3458265	-470.6616812	-431.801809	-409.1751468
D3R	-5.782224792	-1.916526335	-131.6154746	-127.0166475	-87.07995999	-60.71568089
H1R	-315.3294375	-197.6936808	-282.3408378	-375.7230741	-340.6261368	-243.524256
MOR	-370.5128398	-279.2973453	-365.8928409	-453.0830695	-420.527391	-382.8554935
NK1R	-623.2336173	-483.6519094	-659.2913741	-641.4495664	-616.2749273	-585.2688078
S1P1R	214.6039567	243.1706927	506.6414427	438.3647082	568.0204342	502.4764441
Absolute Sum	3558.03	2956.27	4551.59	4520.80	4209.43	3767.87
Different investigated constraint parameters
Final selection:			Distance 3-7%			Constant -1 - -10				Harmonic 0.4-0.8			Weight 2-4
	Distance-5%	Distance+0%	Distance+5%	Distance+10%	Distance+5% and in relax+0%	Constant -1	Constant -5	Constant -10	Harmonic 0.25	Harmonic 0.5	Harmonic 1.0	Weight 1	Weight 4	Weight 8
AA1R	-370.54	-208.52	-369.15	296.00	-468.97	-72.26	-99.15	-101.97	-13.95	-14.47	-122.48	-90.78	-43.75	-30.68
AA2AR	-164.59	-238.07	8.66	333.60	-282.70	97.38	90.17	73.16	369.67	147.15	171.08	168.82	188.39	273.55
ADRB1	-245.30	-127.38	11.86	233.40	-186.46	12.56	61.10	2.94	120.24	-1.08	-16.65	9.10	61.56	217.66
ADRB2	-274.92	-147.73	18.06	244.27	-272.68	53.16	17.27	78.52	163.01	-16.09	49.05	88.55	39.30	181.75
CCR7	-367.62	-235.54	-238.19	279.14	-384.58	-87.79	-102.48	-78.52	118.68	-14.35	-122.85	-85.46	-36.71	-13.51
CXCR2	-637.62	-501.14	-389.96	143.96	-595.38	-316.45	-330.97	-298.55	-162.17	-347.39	-319.23	-347.47	-296.17	-212.24
CXCR4	-552.53	-403.40	-322.20	168.28	-492.41	-149.45	-158.47	-127.85	35.18	-146.22	-206.66	-167.68	-101.25	-110.97
D3R	-255.76	-165.42	-169.61	185.96	-333.05	49.05	93.01	69.57	82.18	29.83	-48.26	-111.43	53.31	84.24
H1R	-507.49	-276.12	-326.00	108.46	-490.24	-121.98	-127.38	-144.66	-74.03	-126.19	-179.57	-145.82	-124.91	-102.59
MOR	-497.83	-432.55	-326.40	-192.09	-385.30	-266.08	-176.40	-203.51	-206.00	-219.28	-272.54	-254.29	-199.83	-188.55
NK1R	-584.89	-454.80	-297.92	-280.46	-604.40	-231.71	-270.73	-281.14	-197.22	-259.50	-282.47	-253.28	-247.25	-332.65
S1P1R	-273.28	-213.73	-11.91	166.06	-106.45	-109.89	-107.02	-195.16	29.04	-52.70	29.04	-145.65	-98.71	-29.11
Absolute Sum	4732.37	3323.20	2571.12	2631.68	4602.62	1567.76	1634.15	1655.55	1571.37	1374.25	1819.88	1868.33	1491.14	1777.50
Filter in the end for selecting the best models
	No Filter	Filter +-50	Filter +-100	Filter +-150	Filter +-200	Filter +-400
AA1R	-110.397241	-48.88998214	-61.21288642	-81.5824157	-81.5824157	110.397241
AA2AR	299.2009464	151.7768472	172.5594089	184.4981081	184.4981081	299.2009464
ADRB1	-64.3493859	-158.0311263	-163.1452901	-163.1452901	-223.4345924	64.3493859
ADRB2	208.4401345	121.1834957	121.1834957	59.8632069	118.5640296	208.4401345
CCR7	344.9025669	274.7901089	260.4573701	282.9979366	282.9979366	242.0551198
CXCR2	-232.2264202	-314.4770642	-345.2205398	-304.9564547	-329.5125152	348.6122757
CXCR4	-381.5942932	-110.4383593	-122.7400424	-95.52336654	-72.8067592	254.3433129
D3R	-32.24863942	27.38734311	21.89853625	-4.314202852	-29.08819221	166.82763
H1R	-127.7506375	-169.1450363	-101.4725083	-101.4725083	-88.70529903	127.7506375
MOR	-191.3751477	-217.3209092	-207.1319093	-191.3751477	-191.3751477	191.3751477
NK1R	-337.228197	-268.2509541	-252.7599322	-299.6159734	-248.4955921	215.8836997
S1P1R	200.0846337	254.8188484	255.88766	270.4435774	144.8026579	200.0846337
Absolute Sum	2529.80	2116.51	2085.67	2039.79	1995.86	2429.32
